# Supplementary material for: Transmission Patterns of Co-Circulation of Omicron Sub-Lineages in Hong Kong SAR, China, a City with Rigorous Social Distancing Measures, in 2022
Source: Preprints.org preprint supplement (doi:10.20944/preprints202404.0623.v1), 2024-04-09
Supplement: Supplementary file 1 [file Table S1.xlsx]

## Sheet: Table S1
Table S1. Quarantine arrangements in phases for the inbound travelers and social distancing measures implemented in 2022.
Period	Quarantine arrangements in phases for the inbound travelers	Social distancing measures
Before 05 Feb	Up to 21 days of hotel quarantine, depends on which risk groups that the countries were categorized	Suspension of face-to-face classes, operation of various scheduled premises, and food and drink consumption at the catering premises; restriction-testing declaration under which people within the specified ‘restricted area’ in Kwai Chung; work-from-home arrangement in Government departments and private companies
05 Feb – 31 Mar	14 days of mandatory hotel quarantine + seven days of home surveillance for all countries (14+7 model)	StayHomeSafe Scheme for close contacts to undergo home quarantine; increased number of scheduled premises subject to LeaveHomeSafe and Vaccine Pass Arrangement; suspension of dinnertime dine-in services; tightening of boarding requirements of place-specific flights; closure of gazette beaches
01 Apr – 11 Aug	Seven days of mandatory hotel quarantine + seven days of home surveillance (7+7 model)	Whole-school resumption of half-day face-to-face classes; dinnertime dine-in services resumption; re-opening of most previously closed premises; establishment of the third stage of Vaccine Pass; compulsory RAT conduction for patrons within the preceding one day before entering bars, pubs, clubs or nightclubs; suspension of route-specific flight suspension mechanism
12 Aug – 25 Sep	Three days of mandatory hotel quarantine + 4 days of home surveillance (3+4 model)	Adjustments to the Vaccine Pass, including the Red Code and Amber Code for categorization of people with different risks of infection, as well as revision to the Vaccine Pass applicable age to 5 and to all inbound travelers; compulsory RAT conduction for participants of banquets within the preceding one day before entering the premises
26 Sep – 13 Dec	Cancelled mandatory hotel quarantine + three days of home surveillance (0+3 model)	Further relaxation of social distancing measures, including increased maximum number of persons allowed in group gatherings in public places; lifting of restrictions on live performance and dancing activity in catering premises and bars/pubs, and eating and drinking outdoor areas of theme parks and inside cinema houses
14 Dec – 31 Dec	Both mandatory hotel quarantine and home surveillance were ceased	Rescission of LeaveHomeSafe QR code scanning before entering scheduled premises, while the Vaccine Pass arrangement remained in force
