# Supplementary material for: Transmission Patterns of Co-Circulation of Omicron Sub-Lineages in Hong Kong SAR, China, a City with Rigorous Social Distancing Measures, in 2022
Source: Preprints.org preprint supplement (doi:10.20944/preprints202404.0623.v1), 2024-04-09
Supplement: Supplementary file 2 [file Table S2 .xlsx]

## Sheet: Additional file 3
Additional file 3. List of local COVID-19 positive clinical samples during the study period.
Date of collection	Lineage	Sequence name on GISAID	Accession ID
2022-01-10	BA.1	hCoV-19/Hong Kong/HK-HKPU-12941/2022	EPI_ISL_12417546
2022-01-14	BA.1	hCoV-19/Hong Kong/HK-HKPU-PU22TM212995/2022	EPI_ISL_12417605
2022-01-17	AY.127	hCoV-19/Hong Kong/HK-HKPU-13047/2022	EPI_ISL_9009611
2022-01-20	AY.127	hCoV-19/Hong Kong/HK-HKPU-13088/2022	EPI_ISL_12417666
2022-01-21	BA.2.2	hCoV-19/Hong Kong/HK-HKPU-13103/2022	EPI_ISL_12417672
2022-01-21	BA.2.2	hCoV-19/Hong Kong/HK-HKPU-13107/2022	EPI_ISL_12417675
2022-01-21	AY.127	hCoV-19/Hong Kong/HK-HKPU-13124/2022	EPI_ISL_12417679
2022-01-21	AY.127	hCoV-19/Hong Kong/HK-HKPU-13120/2022	EPI_ISL_12417680
2022-01-21	AY.127	hCoV-19/Hong Kong/HK-HKPU-13123/2022	EPI_ISL_12417686
2022-01-22	AY.127	hCoV-19/Hong Kong/HK-HKPU-13147/2022	EPI_ISL_12417699
2022-01-23	AY.127	hCoV-19/Hong Kong/HK-HKPU-13157/2022	EPI_ISL_12417709
2022-01-23	BA.2.2	hCoV-19/Hong Kong/HK-HKPU-13265/2022	EPI_ISL_12417737
2022-01-23	BA.2.2	hCoV-19/Hong Kong/HK-HKPU-13266/2022	EPI_ISL_12417738
2022-01-23	BA.2.2	hCoV-19/Hong Kong/HK-HKPU-13155/2022	EPI_ISL_12417786
2022-01-23	AY.127	hCoV-19/Hong Kong/HK-HKPU-13281/2022	EPI_ISL_12417795
2022-01-23	AY.127	hCoV-19/Hong Kong/HK-HKPU-13282/2022	EPI_ISL_12417800
2022-01-24	BA.2.2	hCoV-19/Hong Kong/HK-HKPU-13293/2022	EPI_ISL_12417818
2022-01-24	BA.2.2	hCoV-19/Hong Kong/HK-HKPU-13353/2022	EPI_ISL_12417848
2022-01-24	BA.2.2	hCoV-19/Hong Kong/HK-HKPU-13340/2022	EPI_ISL_12417852
2022-01-24	AY.127	hCoV-19/Hong Kong/HK-HKPU-13381/2022	EPI_ISL_12417855
2022-01-24	BA.2.2	hCoV-19/Hong Kong/HK-HKPU-13335/2022	EPI_ISL_12417857
2022-01-24	AY.127	hCoV-19/Hong Kong/HK-HKPU-13390/2022	EPI_ISL_12417866
2022-01-24	AY.127	hCoV-19/Hong Kong/HK-HKPU-13383/2022	EPI_ISL_12417869
2022-01-25	BA.2.2	hCoV-19/Hong Kong/HK-HKPU-13428/2022	EPI_ISL_12417879
2022-01-25	BA.2.2	hCoV-19/Hong Kong/HK-HKPU-13463/2022	EPI_ISL_12417884
2022-01-25	BA.2.2	hCoV-19/Hong Kong/HK-HKPU-13427/2022	EPI_ISL_12417936
2022-01-26	BA.2.2	hCoV-19/Hong Kong/HK-HKPU-13566/2022	EPI_ISL_12417973
2022-01-26	BA.2.2	hCoV-19/Hong Kong/HK-HKPU-13620/2022	EPI_ISL_12418000
2022-01-26	BA.2.2	hCoV-19/Hong Kong/HK-HKPU-13612/2022	EPI_ISL_12418005
2022-01-27	BA.2.2	hCoV-19/Hong Kong/HK-HKPU-13717/2022	EPI_ISL_12418018
2022-01-27	BA.2.2	hCoV-19/Hong Kong/HK-HKPU-13681/2022	EPI_ISL_12418020
2022-01-27	BA.2.2	hCoV-19/Hong Kong/HK-HKPU-13795/2022	EPI_ISL_12418021
2022-01-28	BA.2.2	hCoV-19/Hong Kong/HK-HKPU-13875/2022	EPI_ISL_12418065
2022-01-28	BA.2.2	hCoV-19/Hong Kong/HK-HKPU-13846/2022	EPI_ISL_12418066
2022-01-30	BA.2.2	hCoV-19/Hong Kong/HK-HKPU-14100/2022	EPI_ISL_12418069
2022-02-01	BA.2.2	hCoV-19/Hong Kong/HK-HKPU-14241/2022	EPI_ISL_12418078
2022-02-04	BA.2.2	hCoV-19/Hong Kong/HK-HKPU-PU22MB304835/2022	EPI_ISL_12418197
2022-02-04	BA.2.2	hCoV-19/Hong Kong/HK-HKPU-PU22MB304836/2022	EPI_ISL_12418198
2022-02-04	BA.2.2	hCoV-19/Hong Kong/HK-HKPU-PU22MB304851/2022	EPI_ISL_12418199
2022-02-04	BA.2.2	hCoV-19/Hong Kong/HK-HKPU-PU22MB304869/2022	EPI_ISL_12418200
2022-02-04	BA.2.2	hCoV-19/Hong Kong/HK-HKPU-PU22MB304906/2022	EPI_ISL_12418201
2022-02-04	BA.2.2	hCoV-19/Hong Kong/HK-HKPU-PU22MC861422/2022	EPI_ISL_12418202
2022-02-04	BA.2.2	hCoV-19/Hong Kong/HK-HKPU-PU22MC861420/2022	EPI_ISL_12418203
2022-02-04	BA.2.2	hCoV-19/Hong Kong/HK-HKPU-PU22MC861392/2022	EPI_ISL_12418204
2022-02-04	BA.2.2	hCoV-19/Hong Kong/HK-HKPU-PU22MC861390/2022	EPI_ISL_12418205
2022-02-04	BA.2.2	hCoV-19/Hong Kong/HK-HKPU-PU22MC861389/2022	EPI_ISL_12418206
2022-02-04	BA.2.2	hCoV-19/Hong Kong/HK-HKPU-PU22MC861429/2022	EPI_ISL_12418207
2022-02-04	BA.2.2	hCoV-19/Hong Kong/HK-HKPU-PU22MC861431/2022	EPI_ISL_12418208
2022-02-04	BA.2.2	hCoV-19/Hong Kong/HK-HKPU-PU22MC861430/2022	EPI_ISL_12418209
2022-02-04	BA.2.2	hCoV-19/Hong Kong/HK-HKPU-PU22MB304961/2022	EPI_ISL_12418211
2022-02-04	BA.2.2	hCoV-19/Hong Kong/HK-HKPU-PU22MB305002/2022	EPI_ISL_12418212
2022-02-04	BA.2.2	hCoV-19/Hong Kong/HK-HKPU-PU22MB304990/2022	EPI_ISL_12418213
2022-02-04	BA.2.2	hCoV-19/Hong Kong/HK-HKPU-PU22MB304991/2022	EPI_ISL_12418214
2022-02-04	BA.2.2	hCoV-19/Hong Kong/HK-HKPU-PU22MB304992/2022	EPI_ISL_12418215
2022-02-04	BA.2.2	hCoV-19/Hong Kong/HK-HKPU-PU22MB305034/2022	EPI_ISL_12418216
2022-02-04	BA.2.2	hCoV-19/Hong Kong/HK-HKPU-PU22MB305020/2022	EPI_ISL_12418217
2022-02-04	BA.2.2	hCoV-19/Hong Kong/HK-HKPU-PU22MB305035/2022	EPI_ISL_12418218
2022-02-04	BA.2.2	hCoV-19/Hong Kong/HK-HKPU-PU22MB305023/2022	EPI_ISL_12418219
2022-02-04	BA.2.2	hCoV-19/Hong Kong/HK-HKPU-PU22MB305077/2022	EPI_ISL_12418220
2022-02-04	BA.2.2	hCoV-19/Hong Kong/HK-HKPU-PU22MC861472/2022	EPI_ISL_12418221
2022-02-04	BA.2.2	hCoV-19/Hong Kong/HK-HKPU-PU22MC861483/2022	EPI_ISL_12418222
2022-02-04	BA.2.2	hCoV-19/Hong Kong/HK-HKPU-PU22MC861493/2022	EPI_ISL_12418223
2022-02-04	BA.2.2	hCoV-19/Hong Kong/HK-HKPU-PU22MC861503/2022	EPI_ISL_12418224
2022-02-04	BA.2.2	hCoV-19/Hong Kong/HK-HKPU-PU22MB305140/2022	EPI_ISL_12418225
2022-02-04	BA.2.2	hCoV-19/Hong Kong/HK-HKPU-PU22MB305141/2022	EPI_ISL_12418226
2022-02-04	BA.2.2	hCoV-19/Hong Kong/HK-HKPU-PU22MC861546/2022	EPI_ISL_12418234
2022-02-04	BA.2.2	hCoV-19/Hong Kong/HK-HKPU-PU22MB305303/2022	EPI_ISL_12418242
2022-02-04	BA.2.2	hCoV-19/Hong Kong/HK-HKPU-PU22TM230886/2022	EPI_ISL_12418247
2022-02-04	BA.2.2	hCoV-19/Hong Kong/HK-HKPU-PU22TM230887/2022	EPI_ISL_12418248
2022-02-04	BA.2.2	hCoV-19/Hong Kong/HK-HKPU-PU22TM230888/2022	EPI_ISL_12418249
2022-02-04	BA.2.2	hCoV-19/Hong Kong/HK-HKPU-PU22TM230889/2022	EPI_ISL_12418250
2022-02-04	BA.2.2	hCoV-19/Hong Kong/HK-HKPU-PU22TM230890/2022	EPI_ISL_12418251
2022-02-04	BA.2.2	hCoV-19/Hong Kong/HK-HKPU-PU22TM231111/2022	EPI_ISL_12418252
2022-02-04	BA.2.2	hCoV-19/Hong Kong/HK-HKPU-PU22TM231113/2022	EPI_ISL_12418253
2022-02-04	BA.2.2	hCoV-19/Hong Kong/HK-HKPU-PU22TM231112/2022	EPI_ISL_12418254
2022-02-04	BA.2.2	hCoV-19/Hong Kong/HK-HKPU-PU22TM231168/2022	EPI_ISL_12418255
2022-02-04	BA.2.2	hCoV-19/Hong Kong/HK-HKPU-PU22TM231165/2022	EPI_ISL_12418256
2022-02-04	BA.2.2	hCoV-19/Hong Kong/HK-HKPU-PU22TM231166/2022	EPI_ISL_12418257
2022-02-04	BA.2.2	hCoV-19/Hong Kong/HK-HKPU-PU22TM231167/2022	EPI_ISL_12418258
2022-02-04	BA.2.2	hCoV-19/Hong Kong/HK-HKPU-PU22TM231652/2022	EPI_ISL_12418260
2022-02-04	BA.2.2	hCoV-19/Hong Kong/HK-HKPU-PU22TM231665/2022	EPI_ISL_12418261
2022-02-04	BA.2.2	hCoV-19/Hong Kong/HK-HKPU-PU22TM231666/2022	EPI_ISL_12418262
2022-02-04	AY.127	hCoV-19/Hong Kong/HK-HKPU-PU22TM231667/2022	EPI_ISL_12418263
2022-02-04	BA.2.2	hCoV-19/Hong Kong/HK-HKPU-PU22TM231668/2022	EPI_ISL_12418264
2022-02-04	BA.2.2	hCoV-19/Hong Kong/HK-HKPU-PU22TM233625/2022	EPI_ISL_12418265
2022-02-04	BA.2.2	hCoV-19/Hong Kong/HK-HKPU-PU22TM231669/2022	EPI_ISL_12418266
2022-02-04	BA.2.2	hCoV-19/Hong Kong/HK-HKPU-PU22TM231670/2022	EPI_ISL_12418267
2022-02-04	BA.2.2	hCoV-19/Hong Kong/HK-HKPU-PU22TM231671/2022	EPI_ISL_12418268
2022-02-04	BA.2.2	hCoV-19/Hong Kong/HK-HKPU-PU22TM232234/2022	EPI_ISL_12418269
2022-02-04	BA.2.2	hCoV-19/Hong Kong/HK-HKPU-PU22TM232235/2022	EPI_ISL_12418270
2022-02-04	BA.2.2	hCoV-19/Hong Kong/HK-HKPU-PU22TM232258/2022	EPI_ISL_12418271
2022-02-04	BA.2.2	hCoV-19/Hong Kong/HK-HKPU-PU22TM232259/2022	EPI_ISL_12418272
2022-02-04	BA.2.2	hCoV-19/Hong Kong/HK-HKPU-PU22TM232260/2022	EPI_ISL_12418273
2022-02-04	BA.2.2	hCoV-19/Hong Kong/HK-HKPU-PU22TM232261/2022	EPI_ISL_12418274
2022-02-04	BA.2.2	hCoV-19/Hong Kong/HK-HKPU-PU22TM232262/2022	EPI_ISL_12418275
2022-02-04	BA.2.2	hCoV-19/Hong Kong/HK-HKPU-PU22TM232263/2022	EPI_ISL_12418276
2022-02-04	BA.2.2	hCoV-19/Hong Kong/HK-HKPU-PU22TM232264/2022	EPI_ISL_12418277
2022-02-04	BA.2.2	hCoV-19/Hong Kong/HK-HKPU-PU22TM232265/2022	EPI_ISL_12418278
2022-02-04	BA.2.2	hCoV-19/Hong Kong/HK-HKPU-PU22TM232273/2022	EPI_ISL_12418279
2022-02-04	BA.2.2	hCoV-19/Hong Kong/HK-HKPU-PU22TM232274/2022	EPI_ISL_12418280
2022-02-04	BA.2.2	hCoV-19/Hong Kong/HK-HKPU-PU22TM232275/2022	EPI_ISL_12418281
2022-02-04	BA.2.2	hCoV-19/Hong Kong/HK-HKPU-PU22TM232276/2022	EPI_ISL_12418282
2022-02-04	AY.127	hCoV-19/Hong Kong/HK-HKPU-PU22TM232277/2022	EPI_ISL_12418283
2022-02-04	BA.2.2	hCoV-19/Hong Kong/HK-HKPU-PU22TM232278/2022	EPI_ISL_12418284
2022-02-04	BA.2.2	hCoV-19/Hong Kong/HK-HKPU-PU22TM232279/2022	EPI_ISL_12418285
2022-02-04	BA.2.2	hCoV-19/Hong Kong/HK-HKPU-PU22TM232280/2022	EPI_ISL_12418286
2022-02-04	BA.2.2	hCoV-19/Hong Kong/HK-HKPU-PU22TM232281/2022	EPI_ISL_12418287
2022-02-04	AY.127	hCoV-19/Hong Kong/HK-HKPU-PU22TM232287/2022	EPI_ISL_12418288
2022-02-04	AY.127	hCoV-19/Hong Kong/HK-HKPU-PU22TM232288/2022	EPI_ISL_12418289
2022-02-04	AY.127	hCoV-19/Hong Kong/HK-HKPU-PU22TM232289/2022	EPI_ISL_12418103
2022-02-04	AY.127	hCoV-19/Hong Kong/HK-HKPU-PU22TM232291/2022	EPI_ISL_12418104
2022-02-04	BA.2.2	hCoV-19/Hong Kong/HK-HKPU-PU22TM232293/2022	EPI_ISL_12418105
2022-02-04	BA.2.2	hCoV-19/Hong Kong/HK-HKPU-PU22TM232294/2022	EPI_ISL_12418106
2022-02-04	AY.127	hCoV-19/Hong Kong/HK-HKPU-PU22TM232295/2022	EPI_ISL_12418107
2022-02-04	AY.127	hCoV-19/Hong Kong/HK-HKPU-PU22TM232297/2022	EPI_ISL_12418109
2022-02-04	AY.127	hCoV-19/Hong Kong/HK-HKPU-PU22TM232298/2022	EPI_ISL_12418110
2022-02-04	AY.127	hCoV-19/Hong Kong/HK-HKPU-PU22TM232300/2022	EPI_ISL_12418111
2022-02-04	AY.127	hCoV-19/Hong Kong/HK-HKPU-PU22TM232301/2022	EPI_ISL_12418112
2022-02-04	BA.2.2	hCoV-19/Hong Kong/HK-HKPU-PU22TM232302/2022	EPI_ISL_12418113
2022-02-04	BA.2.2	hCoV-19/Hong Kong/HK-HKPU-PU22TM232305/2022	EPI_ISL_12418114
2022-02-04	BA.2.2	hCoV-19/Hong Kong/HK-HKPU-PU22TM232306/2022	EPI_ISL_12418115
2022-02-04	BA.2.2	hCoV-19/Hong Kong/HK-HKPU-PU22TM232307/2022	EPI_ISL_12418116
2022-02-04	BA.2.2	hCoV-19/Hong Kong/HK-HKPU-PU22TM232308/2022	EPI_ISL_12418117
2022-02-04	BA.2.2	hCoV-19/Hong Kong/HK-HKPU-PU22TM232309/2022	EPI_ISL_12418118
2022-02-04	BA.2.2	hCoV-19/Hong Kong/HK-HKPU-PU22TM232514/2022	EPI_ISL_12418119
2022-02-04	BA.2.2	hCoV-19/Hong Kong/HK-HKPU-PU22TM232522/2022	EPI_ISL_12418120
2022-02-04	BA.2.2	hCoV-19/Hong Kong/HK-HKPU-PU22TM232523/2022	EPI_ISL_12418121
2022-02-04	BA.2.2	hCoV-19/Hong Kong/HK-HKPU-PU22TM232524/2022	EPI_ISL_12418122
2022-02-04	BA.2.2	hCoV-19/Hong Kong/HK-HKPU-PU22TM232525/2022	EPI_ISL_12418123
2022-02-04	BA.2.2	hCoV-19/Hong Kong/HK-HKPU-PU22TM232527/2022	EPI_ISL_12418124
2022-02-04	BA.2.2	hCoV-19/Hong Kong/HK-HKPU-PU22TM232621/2022	EPI_ISL_12418125
2022-02-04	BA.2.2	hCoV-19/Hong Kong/HK-HKPU-PU22TM232625/2022	EPI_ISL_12418126
2022-02-04	BA.2.2	hCoV-19/Hong Kong/HK-HKPU-PU22TM232667/2022	EPI_ISL_12418128
2022-02-04	BA.2.2	hCoV-19/Hong Kong/HK-HKPU-PU22TM232668/2022	EPI_ISL_12418129
2022-02-04	BA.2.2	hCoV-19/Hong Kong/HK-HKPU-PU22TM232670/2022	EPI_ISL_12418130
2022-02-04	BA.2.2	hCoV-19/Hong Kong/HK-HKPU-PU22TM232671/2022	EPI_ISL_12418131
2022-02-04	BA.2.2	hCoV-19/Hong Kong/HK-HKPU-PU22TM233069/2022	EPI_ISL_12418132
2022-02-04	BA.2.2	hCoV-19/Hong Kong/HK-HKPU-PU22TM233072/2022	EPI_ISL_12418133
2022-02-04	BA.2.2	hCoV-19/Hong Kong/HK-HKPU-PU22TM233587/2022	EPI_ISL_12418134
2022-02-04	BA.2.2	hCoV-19/Hong Kong/HK-HKPU-PU22TM233588/2022	EPI_ISL_12418135
2022-02-04	BA.2.2	hCoV-19/Hong Kong/HK-HKPU-PU22TM233605/2022	EPI_ISL_12418136
2022-02-04	BA.2.2	hCoV-19/Hong Kong/HK-HKPU-PU22TM233606/2022	EPI_ISL_12418137
2022-02-04	BA.2.2	hCoV-19/Hong Kong/HK-HKPU-PU22TM233607/2022	EPI_ISL_12418138
2022-02-04	BA.2.2	hCoV-19/Hong Kong/HK-HKPU-PU22TM233608/2022	EPI_ISL_12418139
2022-02-04	BA.2.2	hCoV-19/Hong Kong/HK-HKPU-PU22TM233615/2022	EPI_ISL_12418141
2022-02-04	BA.2.2	hCoV-19/Hong Kong/HK-HKPU-PU22TM233617/2022	EPI_ISL_12418142
2022-02-04	BA.2.2	hCoV-19/Hong Kong/HK-HKPU-PU22TM233618/2022	EPI_ISL_12418143
2022-02-04	BA.2.2	hCoV-19/Hong Kong/HK-HKPU-PU22TM233621/2022	EPI_ISL_12418144
2022-02-04	BA.2.2	hCoV-19/Hong Kong/HK-HKPU-PU22MB304820/2022	EPI_ISL_12418146
2022-02-04	BA.2.2	hCoV-19/Hong Kong/HK-HKPU-PU22TM233627/2022	EPI_ISL_12418147
2022-02-04	AY.127	hCoV-19/Hong Kong/HK-HKPU-PU22TM233635/2022	EPI_ISL_12418148
2022-02-04	BA.2.2	hCoV-19/Hong Kong/HK-HKPU-PU22TM233638/2022	EPI_ISL_12418149
2022-02-04	BA.2.2	hCoV-19/Hong Kong/HK-HKPU-PU22TM233639/2022	EPI_ISL_12418150
2022-02-04	AY.127	hCoV-19/Hong Kong/HK-HKPU-PU22TM234695/2022	EPI_ISL_12418151
2022-02-04	BA.2.2	hCoV-19/Hong Kong/HK-HKPU-PU22TM234751/2022	EPI_ISL_12418152
2022-02-04	BA.2.2	hCoV-19/Hong Kong/HK-HKPU-PU22TM234753/2022	EPI_ISL_12418153
2022-02-04	BA.2.2	hCoV-19/Hong Kong/HK-HKPU-PU22TM234755/2022	EPI_ISL_12418155
2022-02-04	BA.2.2	hCoV-19/Hong Kong/HK-HKPU-PU22TM234756/2022	EPI_ISL_12418156
2022-02-04	BA.2.2	hCoV-19/Hong Kong/HK-HKPU-PU22TM234759/2022	EPI_ISL_12418158
2022-02-04	BA.2.2	hCoV-19/Hong Kong/HK-HKPU-PU22TM234776/2022	EPI_ISL_12418159
2022-02-04	BA.2.2	hCoV-19/Hong Kong/HK-HKPU-PU22TM234778/2022	EPI_ISL_12418160
2022-02-04	BA.2.2	hCoV-19/Hong Kong/HK-HKPU-PU22TM234794/2022	EPI_ISL_12418165
2022-02-04	BA.2.2	hCoV-19/Hong Kong/HK-HKPU-PU22TM234801/2022	EPI_ISL_12418166
2022-02-04	AY.127	hCoV-19/Hong Kong/HK-HKPU-PU22TM234802/2022	EPI_ISL_12418167
2022-02-04	BA.2.2	hCoV-19/Hong Kong/HK-HKPU-PU22TM234803/2022	EPI_ISL_12418168
2022-02-04	AY.127	hCoV-19/Hong Kong/HK-HKPU-PU22TM234805/2022	EPI_ISL_12418169
2022-02-04	BA.2.2	hCoV-19/Hong Kong/HK-HKPU-PU22TM234806/2022	EPI_ISL_12418170
2022-02-04	BA.2.2	hCoV-19/Hong Kong/HK-HKPU-PU22TM235431/2022	EPI_ISL_12418175
2022-02-04	BA.2.2	hCoV-19/Hong Kong/HK-HKPU-PU22TM235453/2022	EPI_ISL_12418176
2022-02-04	BA.2.2	hCoV-19/Hong Kong/HK-HKPU-PU22TM235471/2022	EPI_ISL_12418177
2022-02-04	BA.2.2	hCoV-19/Hong Kong/HK-HKPU-PU22TM235473/2022	EPI_ISL_12418178
2022-02-07	BA.2.2	hCoV-19/Hong Kong/HK-HKPU-PU22MC627158/2022	EPI_ISL_12418523
2022-02-07	BA.2.2	hCoV-19/Hong Kong/HK-HKPU-PU22MC627569/2022	EPI_ISL_12418524
2022-02-07	BA.2.2	hCoV-19/Hong Kong/HK-HKPU-PU22MB305481/2022	EPI_ISL_12418525
2022-02-07	BA.2.2	hCoV-19/Hong Kong/HK-HKPU-PU22MB305482/2022	EPI_ISL_12418526
2022-02-07	BA.2.2	hCoV-19/Hong Kong/HK-HKPU-PU22MB305491/2022	EPI_ISL_12418527
2022-02-07	BA.2.2	hCoV-19/Hong Kong/HK-HKPU-PU22MC861617/2022	EPI_ISL_12418528
2022-02-07	BA.2.2	hCoV-19/Hong Kong/HK-HKPU-PU22MC623909/2022	EPI_ISL_12418529
2022-02-07	BA.2.2	hCoV-19/Hong Kong/HK-HKPU-PU22MC861707/2022	EPI_ISL_12418530
2022-02-07	BA.2.2	hCoV-19/Hong Kong/HK-HKPU-PU22MB305660/2022	EPI_ISL_12418531
2022-02-07	BA.2.2	hCoV-19/Hong Kong/HK-HKPU-PU22MB305685/2022	EPI_ISL_12418532
2022-02-07	BA.2.2	hCoV-19/Hong Kong/HK-HKPU-PU22MB305709/2022	EPI_ISL_12418533
2022-02-07	BA.2.2	hCoV-19/Hong Kong/HK-HKPU-PU22MB305710/2022	EPI_ISL_12418534
2022-02-07	BA.2.2	hCoV-19/Hong Kong/HK-HKPU-PU22MB305711/2022	EPI_ISL_12418535
2022-02-07	BA.2.2	hCoV-19/Hong Kong/HK-HKPU-PU22MC861777/2022	EPI_ISL_12418536
2022-02-07	BA.2.2	hCoV-19/Hong Kong/HK-HKPU-PU22MC861776/2022	EPI_ISL_12418537
2022-02-07	BA.2.2	hCoV-19/Hong Kong/HK-HKPU-PU22MC861771/2022	EPI_ISL_12418538
2022-02-07	BA.2.2	hCoV-19/Hong Kong/HK-HKPU-PU22MC861756/2022	EPI_ISL_12418539
2022-02-07	BA.2.2	hCoV-19/Hong Kong/HK-HKPU-PU22MC861755/2022	EPI_ISL_12418540
2022-02-07	BA.2.2	hCoV-19/Hong Kong/HK-HKPU-PU22MC861276/2022	EPI_ISL_12418541
2022-02-07	BA.2.2	hCoV-19/Hong Kong/HK-HKPU-PU22MC861243/2022	EPI_ISL_12418542
2022-02-07	BA.2.2	hCoV-19/Hong Kong/HK-HKPU-PU22MB305742/2022	EPI_ISL_12418423
2022-02-07	BA.2.2	hCoV-19/Hong Kong/HK-HKPU-PU22MB305745/2022	EPI_ISL_12418424
2022-02-07	BA.2.2	hCoV-19/Hong Kong/HK-HKPU-PU22MB305802/2022	EPI_ISL_12418425
2022-02-07	BA.2.2	hCoV-19/Hong Kong/HK-HKPU-PU22MB305805/2022	EPI_ISL_12418426
2022-02-07	BA.2.2	hCoV-19/Hong Kong/HK-HKPU-PU22MB305847/2022	EPI_ISL_12418427
2022-02-07	BA.2.2	hCoV-19/Hong Kong/HK-HKPU-PU22MB305827/2022	EPI_ISL_12418428
2022-02-07	BA.2.2	hCoV-19/Hong Kong/HK-HKPU-PU22MB305821/2022	EPI_ISL_12418429
2022-02-07	BA.2.2	hCoV-19/Hong Kong/HK-HKPU-PU22MB305826/2022	EPI_ISL_12418430
2022-02-07	BA.2.2	hCoV-19/Hong Kong/HK-HKPU-PU22MB305856/2022	EPI_ISL_12418431
2022-02-07	BA.2.2	hCoV-19/Hong Kong/HK-HKPU-PU22MC625047/2022	EPI_ISL_12418432
2022-02-07	BA.2.2	hCoV-19/Hong Kong/HK-HKPU-PU22MB305860/2022	EPI_ISL_12418433
2022-02-07	BA.2.2	hCoV-19/Hong Kong/HK-HKPU-PU22MB305882/2022	EPI_ISL_12418434
2022-02-07	BA.2.2	hCoV-19/Hong Kong/HK-HKPU-PU22MB305873/2022	EPI_ISL_12418435
2022-02-07	BA.2.2	hCoV-19/Hong Kong/HK-HKPU-PU22MC625226/2022	EPI_ISL_12418436
2022-02-07	BA.2.2	hCoV-19/Hong Kong/HK-HKPU-PU22MC625249/2022	EPI_ISL_12418437
2022-02-07	BA.2.2	hCoV-19/Hong Kong/HK-HKPU-PU22MC861808/2022	EPI_ISL_12418438
2022-02-07	BA.2.2	hCoV-19/Hong Kong/HK-HKPU-PU22MC861814/2022	EPI_ISL_12418439
2022-02-07	BA.2.2	hCoV-19/Hong Kong/HK-HKPU-PU22MC861821/2022	EPI_ISL_12418440
2022-02-07	BA.2.2	hCoV-19/Hong Kong/HK-HKPU-PU22MC861826/2022	EPI_ISL_12418441
2022-02-07	BA.2.2	hCoV-19/Hong Kong/HK-HKPU-PU22MC861870/2022	EPI_ISL_12418442
2022-02-07	BA.2.2	hCoV-19/Hong Kong/HK-HKPU-PU22MC861875/2022	EPI_ISL_12418443
2022-02-07	BA.2.2	hCoV-19/Hong Kong/HK-HKPU-PU22TM235561/2022	EPI_ISL_12418444
2022-02-07	BA.2.2	hCoV-19/Hong Kong/HK-HKPU-PU22TM235562/2022	EPI_ISL_12418445
2022-02-07	BA.2.2	hCoV-19/Hong Kong/HK-HKPU-PU22TM235683/2022	EPI_ISL_12418446
2022-02-07	BA.2.3	hCoV-19/Hong Kong/HK-HKPU-PU22TM235684/2022	EPI_ISL_12418447
2022-02-07	BA.2.2	hCoV-19/Hong Kong/HK-HKPU-PU22TM235685/2022	EPI_ISL_12418448
2022-02-07	BA.2.2	hCoV-19/Hong Kong/HK-HKPU-PU22TM235688/2022	EPI_ISL_12418449
2022-02-07	BA.2.2	hCoV-19/Hong Kong/HK-HKPU-PU22TM235689/2022	EPI_ISL_12418450
2022-02-07	BA.2.10	hCoV-19/Hong Kong/HK-HKPU-PU22TM235690/2022	EPI_ISL_12418451
2022-02-07	BA.2.2	hCoV-19/Hong Kong/HK-HKPU-PU22TM235691/2022	EPI_ISL_12418452
2022-02-07	BA.2.10	hCoV-19/Hong Kong/HK-HKPU-PU22TM235692/2022	EPI_ISL_12418453
2022-02-07	BA.2.2	hCoV-19/Hong Kong/HK-HKPU-PU22TM235695/2022	EPI_ISL_12418454
2022-02-07	BA.2.2	hCoV-19/Hong Kong/HK-HKPU-PU22TM235696/2022	EPI_ISL_12418455
2022-02-07	BA.1.13.1	hCoV-19/Hong Kong/HK-HKPU-PU22TM235697/2022	EPI_ISL_12418456
2022-02-07	AY.127	hCoV-19/Hong Kong/HK-HKPU-PU22TM235698/2022	EPI_ISL_12418457
2022-02-07	BA.2.2	hCoV-19/Hong Kong/HK-HKPU-PU22TM235700/2022	EPI_ISL_12418458
2022-02-07	BA.2.10	hCoV-19/Hong Kong/HK-HKPU-PU22TM235701/2022	EPI_ISL_12418459
2022-02-07	BA.2.2	hCoV-19/Hong Kong/HK-HKPU-PU22TM235702/2022	EPI_ISL_12418460
2022-02-07	BA.2.2	hCoV-19/Hong Kong/HK-HKPU-PU22TM235712/2022	EPI_ISL_12418461
2022-02-07	AY.127	hCoV-19/Hong Kong/HK-HKPU-PU22TM235956/2022	EPI_ISL_12418462
2022-02-07	BA.2.2	hCoV-19/Hong Kong/HK-HKPU-PU22TM235965/2022	EPI_ISL_12418463
2022-02-07	BA.2.2	hCoV-19/Hong Kong/HK-HKPU-PU22TM236229/2022	EPI_ISL_12418464
2022-02-07	BA.2.2	hCoV-19/Hong Kong/HK-HKPU-PU22TM236231/2022	EPI_ISL_12418465
2022-02-07	BA.2.2	hCoV-19/Hong Kong/HK-HKPU-PU22TM236232/2022	EPI_ISL_12418466
2022-02-07	BA.2.2	hCoV-19/Hong Kong/HK-HKPU-PU22TM236262/2022	EPI_ISL_12418467
2022-02-07	AY.127	hCoV-19/Hong Kong/HK-HKPU-PU22TM236263/2022	EPI_ISL_12418468
2022-02-07	BA.2.2	hCoV-19/Hong Kong/HK-HKPU-PU22TM236264/2022	EPI_ISL_12418469
2022-02-07	BA.2.2	hCoV-19/Hong Kong/HK-HKPU-PU22TM236265/2022	EPI_ISL_12418470
2022-02-07	AY.127	hCoV-19/Hong Kong/HK-HKPU-PU22TM236268/2022	EPI_ISL_12418471
2022-02-07	AY.127	hCoV-19/Hong Kong/HK-HKPU-PU22TM236269/2022	EPI_ISL_12418472
2022-02-07	BA.2.10	hCoV-19/Hong Kong/HK-HKPU-PU22TM236676/2022	EPI_ISL_12418473
2022-02-07	BA.2.2	hCoV-19/Hong Kong/HK-HKPU-PU22TM236678/2022	EPI_ISL_12418474
2022-02-07	BA.2.10	hCoV-19/Hong Kong/HK-HKPU-PU22TM236679/2022	EPI_ISL_12418475
2022-02-07	BA.2.2	hCoV-19/Hong Kong/HK-HKPU-PU22TM236680/2022	EPI_ISL_12418476
2022-02-07	BA.2	hCoV-19/Hong Kong/HK-HKPU-PU22TM236681/2022	EPI_ISL_12418477
2022-02-07	BA.2	hCoV-19/Hong Kong/HK-HKPU-PU22TM236682/2022	EPI_ISL_12418478
2022-02-07	BA.2.10	hCoV-19/Hong Kong/HK-HKPU-PU22TM236683/2022	EPI_ISL_12418479
2022-02-07	BA.2.10	hCoV-19/Hong Kong/HK-HKPU-PU22TM236879/2022	EPI_ISL_12418480
2022-02-07	BA.2	hCoV-19/Hong Kong/HK-HKPU-PU22TM236702/2022	EPI_ISL_12418481
2022-02-07	BA.2.10	hCoV-19/Hong Kong/HK-HKPU-PU22TM236703/2022	EPI_ISL_12418482
2022-02-07	BA.2.2	hCoV-19/Hong Kong/HK-HKPU-PU22TM236704/2022	EPI_ISL_12418483
2022-02-07	BA.2.2	hCoV-19/Hong Kong/HK-HKPU-PU22TM236705/2022	EPI_ISL_12418484
2022-02-07	BA.2.2	hCoV-19/Hong Kong/HK-HKPU-PU22TM236706/2022	EPI_ISL_12418485
2022-02-07	BA.2.37	hCoV-19/Hong Kong/HK-HKPU-PU22TM236707/2022	EPI_ISL_12418486
2022-02-07	BA.2.2	hCoV-19/Hong Kong/HK-HKPU-PU22TM236708/2022	EPI_ISL_12418487
2022-02-07	BA.2.2	hCoV-19/Hong Kong/HK-HKPU-PU22TM236709/2022	EPI_ISL_12418488
2022-02-07	BA.2.2	hCoV-19/Hong Kong/HK-HKPU-PU22TM236710/2022	EPI_ISL_12418489
2022-02-07	BA.2.10	hCoV-19/Hong Kong/HK-HKPU-PU22TM236711/2022	EPI_ISL_12418490
2022-02-07	BA.2.2	hCoV-19/Hong Kong/HK-HKPU-PU22TM236721/2022	EPI_ISL_12418491
2022-02-07	AY.127	hCoV-19/Hong Kong/HK-HKPU-PU22TM236723/2022	EPI_ISL_12418492
2022-02-07	AY.127	hCoV-19/Hong Kong/HK-HKPU-PU22TM236724/2022	EPI_ISL_12418493
2022-02-07	BA.2.2	hCoV-19/Hong Kong/HK-HKPU-PU22TM236726/2022	EPI_ISL_12418494
2022-02-07	BA.2.2	hCoV-19/Hong Kong/HK-HKPU-PU22TM236727/2022	EPI_ISL_12418495
2022-02-07	BA.2.2	hCoV-19/Hong Kong/HK-HKPU-PU22TM236728/2022	EPI_ISL_12418496
2022-02-07	BA.2.10	hCoV-19/Hong Kong/HK-HKPU-PU22TM236732/2022	EPI_ISL_12418497
2022-02-07	BA.2.2	hCoV-19/Hong Kong/HK-HKPU-PU22TM236733/2022	EPI_ISL_12418498
2022-02-07	BA.2.10	hCoV-19/Hong Kong/HK-HKPU-PU22TM236734/2022	EPI_ISL_12418499
2022-02-07	BA.2.2	hCoV-19/Hong Kong/HK-HKPU-PU22TM236740/2022	EPI_ISL_12418500
2022-02-07	BA.2.2	hCoV-19/Hong Kong/HK-HKPU-PU22TM236741/2022	EPI_ISL_12418501
2022-02-07	BA.2.2	hCoV-19/Hong Kong/HK-HKPU-PU22TM236742/2022	EPI_ISL_12418502
2022-02-07	BA.1.17.2	hCoV-19/Hong Kong/HK-HKPU-PU22TM236743/2022	EPI_ISL_12418503
2022-02-07	BA.2.2	hCoV-19/Hong Kong/HK-HKPU-PU22TM236744/2022	EPI_ISL_12418504
2022-02-07	BA.2.2	hCoV-19/Hong Kong/HK-HKPU-PU22TM236746/2022	EPI_ISL_12418505
2022-02-07	AY.127	hCoV-19/Hong Kong/HK-HKPU-PU22TM236747/2022	EPI_ISL_12418506
2022-02-07	BA.2.2	hCoV-19/Hong Kong/HK-HKPU-PU22TM236748/2022	EPI_ISL_12418507
2022-02-07	BA.2.2	hCoV-19/Hong Kong/HK-HKPU-PU22TM236755/2022	EPI_ISL_12418508
2022-02-07	BA.2.2	hCoV-19/Hong Kong/HK-HKPU-PU22TM236758/2022	EPI_ISL_12418509
2022-02-07	BA.2.2	hCoV-19/Hong Kong/HK-HKPU-PU22TM236759/2022	EPI_ISL_12418510
2022-02-07	BA.2.2	hCoV-19/Hong Kong/HK-HKPU-PU22TM236760/2022	EPI_ISL_12418511
2022-02-07	BA.2.2	hCoV-19/Hong Kong/HK-HKPU-PU22TM236763/2022	EPI_ISL_12418512
2022-02-07	BA.2.2	hCoV-19/Hong Kong/HK-HKPU-PU22TM236974/2022	EPI_ISL_12418513
2022-02-07	BA.2.2	hCoV-19/Hong Kong/HK-HKPU-PU22TM237140/2022	EPI_ISL_12418514
2022-02-07	BA.2.2	hCoV-19/Hong Kong/HK-HKPU-PU22TM127141/2022	EPI_ISL_12418515
2022-02-07	BA.2.2	hCoV-19/Hong Kong/HK-HKPU-PU22TM237512/2022	EPI_ISL_12418516
2022-02-07	BA.2.10	hCoV-19/Hong Kong/HK-HKPU-PU22TM237519/2022	EPI_ISL_12418517
2022-02-07	BA.2.2	hCoV-19/Hong Kong/HK-HKPU-PU22TM237530/2022	EPI_ISL_12418518
2022-02-07	BA.2.2	hCoV-19/Hong Kong/HK-HKPU-PU22TM237531/2022	EPI_ISL_12418519
2022-02-07	BA.2.2	hCoV-19/Hong Kong/HK-HKPU-PU22TM237536/2022	EPI_ISL_12418520
2022-02-07	BA.2.2	hCoV-19/Hong Kong/HK-HKPU-PU22TM237565/2022	EPI_ISL_12418521
2022-02-07	BA.2.2	hCoV-19/Hong Kong/HK-HKPU-PU22TM237571/2022	EPI_ISL_12418522
2022-02-07	AY.127	hCoV-19/Hong Kong/HK-HKPU-PU22TM237573/2022	EPI_ISL_12418394
2022-02-07	BA.2.2	hCoV-19/Hong Kong/HK-HKPU-PU22TM237577/2022	EPI_ISL_12418395
2022-02-07	BA.2.2	hCoV-19/Hong Kong/HK-HKPU-PU22TM237594/2022	EPI_ISL_12418396
2022-02-07	BA.2.2	hCoV-19/Hong Kong/HK-HKPU-PU22TM237595/2022	EPI_ISL_12418397
2022-02-07	AY.127	hCoV-19/Hong Kong/HK-HKPU-PU22TM237599/2022	EPI_ISL_12418398
2022-02-07	BA.1.13.1	hCoV-19/Hong Kong/HK-HKPU-PU22TM237601/2022	EPI_ISL_12418399
2022-02-07	BA.2	hCoV-19/Hong Kong/HK-HKPU-PU22TM237603/2022	EPI_ISL_12418400
2022-02-07	BA.2.2	hCoV-19/Hong Kong/HK-HKPU-PU22TM237604/2022	EPI_ISL_12418401
2022-02-07	BA.2.2	hCoV-19/Hong Kong/HK-HKPU-PU22TM237605/2022	EPI_ISL_12418402
2022-02-07	AY.127	hCoV-19/Hong Kong/HK-HKPU-PU22TM237613/2022	EPI_ISL_12418403
2022-02-07	BA.2.2	hCoV-19/Hong Kong/HK-HKPU-PU22TM237614/2022	EPI_ISL_12418404
2022-02-07	BA.2.2	hCoV-19/Hong Kong/HK-HKPU-PU22TM237616/2022	EPI_ISL_12418405
2022-02-07	BA.2.2	hCoV-19/Hong Kong/HK-HKPU-PU22MB305727/2022	EPI_ISL_12418406
2022-02-07	BA.2.2	hCoV-19/Hong Kong/HK-HKPU-PU22MC861788/2022	EPI_ISL_12418408
2022-02-09	BA.2.2	hCoV-19/Hong Kong/HK-HKPU-PU22MB306092/2022	EPI_ISL_12418615
2022-02-09	BA.2.2	hCoV-19/Hong Kong/HK-HKPU-PU22MB306054/2022	EPI_ISL_12418616
2022-02-09	BA.2.2	hCoV-19/Hong Kong/HK-HKPU-PU22MB306059/2022	EPI_ISL_12418617
2022-02-09	BA.2.2	hCoV-19/Hong Kong/HK-HKPU-PU22MC625914/2022	EPI_ISL_12418618
2022-02-09	BA.2.2	hCoV-19/Hong Kong/HK-HKPU-PU22MB306117/2022	EPI_ISL_12418619
2022-02-09	BA.2.2	hCoV-19/Hong Kong/HK-HKPU-PU22MB306125/2022	EPI_ISL_12418620
2022-02-09	BA.2.2	hCoV-19/Hong Kong/HK-HKPU-PU22MB306114/2022	EPI_ISL_12418621
2022-02-09	BA.2.2	hCoV-19/Hong Kong/HK-HKPU-PU22MC861920/2022	EPI_ISL_12418622
2022-02-09	BA.2.2	hCoV-19/Hong Kong/HK-HKPU-PU22MC861921/2022	EPI_ISL_12418623
2022-02-09	BA.2.2	hCoV-19/Hong Kong/HK-HKPU-PU22MC861924/2022	EPI_ISL_12418624
2022-02-09	BA.2.2	hCoV-19/Hong Kong/HK-HKPU-PU22MC861928/2022	EPI_ISL_12418625
2022-02-09	BA.2.2	hCoV-19/Hong Kong/HK-HKPU-PU22MC861949/2022	EPI_ISL_12418626
2022-02-09	BA.2.2	hCoV-19/Hong Kong/HK-HKPU-PU22MC861984/2022	EPI_ISL_12418627
2022-02-09	BA.2.2	hCoV-19/Hong Kong/HK-HKPU-PU22MB306161/2022	EPI_ISL_12418628
2022-02-09	BA.2.2	hCoV-19/Hong Kong/HK-HKPU-PU22MC626354/2022	EPI_ISL_12418629
2022-02-09	BA.2.2	hCoV-19/Hong Kong/HK-HKPU-PU22MC626060/2022	EPI_ISL_12418630
2022-02-09	BA.2.2	hCoV-19/Hong Kong/HK-HKPU-PU22MC626064/2022	EPI_ISL_12418631
2022-02-09	BA.2.2	hCoV-19/Hong Kong/HK-HKPU-PU22MC861919/2022	EPI_ISL_12418632
2022-02-09	BA.2.2	hCoV-19/Hong Kong/HK-HKPU-PU22MC861950/2022	EPI_ISL_12418633
2022-02-09	BA.2.2	hCoV-19/Hong Kong/HK-HKPU-PU22MB306204/2022	EPI_ISL_12418634
2022-02-09	BA.2.2	hCoV-19/Hong Kong/HK-HKPU-PU22MB306220/2022	EPI_ISL_12418635
2022-02-09	BA.2.2	hCoV-19/Hong Kong/HK-HKPU-PU22MB306221/2022	EPI_ISL_12418636
2022-02-09	BA.2.2	hCoV-19/Hong Kong/HK-HKPU-PU22MB306238/2022	EPI_ISL_12418637
2022-02-09	BA.2.2	hCoV-19/Hong Kong/HK-HKPU-PU22MB306241/2022	EPI_ISL_12418638
2022-02-09	BA.2.2	hCoV-19/Hong Kong/HK-HKPU-PU22MB306277/2022	EPI_ISL_12418639
2022-02-09	BA.2.2	hCoV-19/Hong Kong/HK-HKPU-PU22MB306273/2022	EPI_ISL_12418640
2022-02-09	BA.2.2	hCoV-19/Hong Kong/HK-HKPU-PU22MB306278/2022	EPI_ISL_12418641
2022-02-09	BA.2.2	hCoV-19/Hong Kong/HK-HKPU-PU22MC626773/2022	EPI_ISL_12418642
2022-02-09	BA.2.2	hCoV-19/Hong Kong/HK-HKPU-PU22MB306292/2022	EPI_ISL_12418643
2022-02-09	BA.2.2	hCoV-19/Hong Kong/HK-HKPU-PU22MB306293/2022	EPI_ISL_12418644
2022-02-09	BA.2.2	hCoV-19/Hong Kong/HK-HKPU-PU22MB306284/2022	EPI_ISL_12418645
2022-02-09	BA.2.2	hCoV-19/Hong Kong/HK-HKPU-PU22MB306286/2022	EPI_ISL_12418646
2022-02-09	BA.2.2	hCoV-19/Hong Kong/HK-HKPU-PU22MC626973/2022	EPI_ISL_12418647
2022-02-09	BA.2.2	hCoV-19/Hong Kong/HK-HKPU-PU22MC626976/2022	EPI_ISL_12418648
2022-02-09	BA.2.2	hCoV-19/Hong Kong/HK-HKPU-PU22MC626984/2022	EPI_ISL_12418649
2022-02-09	BA.2.2	hCoV-19/Hong Kong/HK-HKPU-PU22MC862072/2022	EPI_ISL_12418650
2022-02-09	BA.2.2	hCoV-19/Hong Kong/HK-HKPU-PU22MC862073/2022	EPI_ISL_12418651
2022-02-09	BA.2.2	hCoV-19/Hong Kong/HK-HKPU-PU22MC862074/2022	EPI_ISL_12418652
2022-02-09	BA.2.2	hCoV-19/Hong Kong/HK-HKPU-PU22MC862075/2022	EPI_ISL_12418653
2022-02-09	BA.2.2	hCoV-19/Hong Kong/HK-HKPU-PU22MC862076/2022	EPI_ISL_12418654
2022-02-09	BA.2.2	hCoV-19/Hong Kong/HK-HKPU-PU22MC862077/2022	EPI_ISL_12418655
2022-02-09	BA.2.2	hCoV-19/Hong Kong/HK-HKPU-PU22MC862018/2022	EPI_ISL_12418656
2022-02-09	BA.2.2	hCoV-19/Hong Kong/HK-HKPU-PU22MC862035/2022	EPI_ISL_12418657
2022-02-09	BA.2.2	hCoV-19/Hong Kong/HK-HKPU-PU22MC862036/2022	EPI_ISL_12418658
2022-02-09	BA.2.2	hCoV-19/Hong Kong/HK-HKPU-PU22MC862042/2022	EPI_ISL_12418659
2022-02-09	BA.2.2	hCoV-19/Hong Kong/HK-HKPU-PU22MC862047/2022	EPI_ISL_12418660
2022-02-09	BA.2.2	hCoV-19/Hong Kong/HK-HKPU-PU22MC862046/2022	EPI_ISL_12418661
2022-02-09	BA.2.2	hCoV-19/Hong Kong/HK-HKPU-PU22MC862048/2022	EPI_ISL_12418662
2022-02-09	BA.2.2	hCoV-19/Hong Kong/HK-HKPU-PU22MC762051/2022	EPI_ISL_12418663
2022-02-09	BA.2.2	hCoV-19/Hong Kong/HK-HKPU-PU22MC862056/2022	EPI_ISL_12418664
2022-02-09	BA.2.2	hCoV-19/Hong Kong/HK-HKPU-PU22MC862058/2022	EPI_ISL_12418665
2022-02-09	BA.2.2	hCoV-19/Hong Kong/HK-HKPU-PU22MC862068/2022	EPI_ISL_12418666
2022-02-09	BA.2.2	hCoV-19/Hong Kong/HK-HKPU-PU22MC627074/2022	EPI_ISL_12418667
2022-02-09	BA.2.2	hCoV-19/Hong Kong/HK-HKPU-PU22MB306379/2022	EPI_ISL_12418668
2022-02-09	BA.2.2	hCoV-19/Hong Kong/HK-HKPU-PU22MB306383/2022	EPI_ISL_12418669
2022-02-09	BA.2.2	hCoV-19/Hong Kong/HK-HKPU-PU22MB306384/2022	EPI_ISL_12418670
2022-02-09	BA.2.2	hCoV-19/Hong Kong/HK-HKPU-PU22MB306389/2022	EPI_ISL_12418671
2022-02-09	BA.2.2	hCoV-19/Hong Kong/HK-HKPU-PU22MB306409/2022	EPI_ISL_12418672
2022-02-09	BA.2.2	hCoV-19/Hong Kong/HK-HKPU-PU22MB306393/2022	EPI_ISL_12418673
2022-02-09	AY.127	hCoV-19/Hong Kong/HK-HKPU-PU22MB306432/2022	EPI_ISL_12418674
2022-02-09	BA.2.2	hCoV-19/Hong Kong/HK-HKPU-PU22MC627261/2022	EPI_ISL_12418675
2022-02-09	BA.2.2	hCoV-19/Hong Kong/HK-HKPU-PU22MB306442/2022	EPI_ISL_12418676
2022-02-09	BA.2.2	hCoV-19/Hong Kong/HK-HKPU-PU22MB306446/2022	EPI_ISL_12418677
2022-02-09	BA.2.2	hCoV-19/Hong Kong/HK-HKPU-PU22MB306450/2022	EPI_ISL_12418678
2022-02-09	BA.2.2	hCoV-19/Hong Kong/HK-HKPU-PU22MB306451/2022	EPI_ISL_12418679
2022-02-09	BA.2.2	hCoV-19/Hong Kong/HK-HKPU-PU22MB306465/2022	EPI_ISL_12418680
2022-02-09	BA.2.2	hCoV-19/Hong Kong/HK-HKPU-PU22MB306464/2022	EPI_ISL_12418681
2022-02-09	BA.2.2	hCoV-19/Hong Kong/HK-HKPU-PU22MC627483/2022	EPI_ISL_12418682
2022-02-09	BA.2.2	hCoV-19/Hong Kong/HK-HKPU-PU22MB306466/2022	EPI_ISL_12418683
2022-02-09	BA.2.2	hCoV-19/Hong Kong/HK-HKPU-PU22MB306449/2022	EPI_ISL_12418684
2022-02-09	BA.2.2	hCoV-19/Hong Kong/HK-HKPU-PU22MB306474/2022	EPI_ISL_12418685
2022-02-09	BA.2.2	hCoV-19/Hong Kong/HK-HKPU-PU22MB306480/2022	EPI_ISL_12418686
2022-02-09	BA.2.2	hCoV-19/Hong Kong/HK-HKPU-PU22MB306491/2022	EPI_ISL_12418687
2022-02-09	BA.2.2	hCoV-19/Hong Kong/HK-HKPU-PU22MB627394/2022	EPI_ISL_12418688
2022-02-09	BA.2.2	hCoV-19/Hong Kong/HK-HKPU-PU22MB306509/2022	EPI_ISL_12418689
2022-02-09	BA.2.2	hCoV-19/Hong Kong/HK-HKPU-PU22MB306515/2022	EPI_ISL_12418690
2022-02-09	BA.2.2	hCoV-19/Hong Kong/HK-HKPU-PU22MB306522/2022	EPI_ISL_12418691
2022-02-09	BA.2.2	hCoV-19/Hong Kong/HK-HKPU-PU22MB306525/2022	EPI_ISL_12418692
2022-02-09	BA.2.2	hCoV-19/Hong Kong/HK-HKPU-PU22MB306526/2022	EPI_ISL_12418693
2022-02-09	BA.2.2	hCoV-19/Hong Kong/HK-HKPU-PU22MB306533/2022	EPI_ISL_12418694
2022-02-09	BA.2.2	hCoV-19/Hong Kong/HK-HKPU-PU22MB306534/2022	EPI_ISL_12418695
2022-02-09	BA.2.2	hCoV-19/Hong Kong/HK-HKPU-PU22MC627672/2022	EPI_ISL_12418696
2022-02-09	BA.2.2	hCoV-19/Hong Kong/HK-HKPU-PU22MB306546/2022	EPI_ISL_12418697
2022-02-09	AY.127	hCoV-19/Hong Kong/HK-HKPU-PU22MB306537/2022	EPI_ISL_12418698
2022-02-09	AY.127	hCoV-19/Hong Kong/HK-HKPU-PU22MB306541/2022	EPI_ISL_12418699
2022-02-09	AY.127	hCoV-19/Hong Kong/HK-HKPU-PU22MB306540/2022	EPI_ISL_12418700
2022-02-09	BA.2.2	hCoV-19/Hong Kong/HK-HKPU-PU22MB306573/2022	EPI_ISL_12418701
2022-02-09	BA.2.2	hCoV-19/Hong Kong/HK-HKPU-PU22MC627793/2022	EPI_ISL_12418702
2022-02-09	BA.2.2	hCoV-19/Hong Kong/HK-HKPU-PU22MB306501/2022	EPI_ISL_12418703
2022-02-09	BA.2.2	hCoV-19/Hong Kong/HK-HKPU-PU22MB306508/2022	EPI_ISL_12418704
2022-02-09	BA.2.2	hCoV-19/Hong Kong/HK-HKPU-PU22MB306592/2022	EPI_ISL_12418705
2022-02-09	BA.2.2	hCoV-19/Hong Kong/HK-HKPU-PU22MB306639/2022	EPI_ISL_12418706
2022-02-09	BA.2.2	hCoV-19/Hong Kong/HK-HKPU-PU22MB306636/2022	EPI_ISL_12418707
2022-02-09	BA.2.10	hCoV-19/Hong Kong/HK-HKPU-PU22TM237780/2022	EPI_ISL_12418708
2022-02-09	BA.2.2	hCoV-19/Hong Kong/HK-HKPU-PU22TM237781/2022	EPI_ISL_12418709
2022-02-09	BA.2.2	hCoV-19/Hong Kong/HK-HKPU-PU22TM237868/2022	EPI_ISL_12418710
2022-02-09	BA.2	hCoV-19/Hong Kong/HK-HKPU-PU22TM237953/2022	EPI_ISL_12418711
2022-02-09	BA.2.2	hCoV-19/Hong Kong/HK-HKPU-PU22TM237954/2022	EPI_ISL_12418712
2022-02-09	BA.2.2	hCoV-19/Hong Kong/HK-HKPU-PU22TM237955/2022	EPI_ISL_12418713
2022-02-09	AY.127	hCoV-19/Hong Kong/HK-HKPU-PU22TM237956/2022	EPI_ISL_12418714
2022-02-09	BA.2	hCoV-19/Hong Kong/HK-HKPU-PU22TM237959/2022	EPI_ISL_12418716
2022-02-09	BA.1.1	hCoV-19/Hong Kong/HK-HKPU-PU22TM237960/2022	EPI_ISL_12418717
2022-02-09	BA.1.1.4	hCoV-19/Hong Kong/HK-HKPU-PU22TM237958/2022	EPI_ISL_12418715
2022-02-11	BA.2.2	hCoV-19/Hong Kong/HK-HKPU-PU22MC630609/2022	EPI_ISL_12418735
2022-02-11	BA.2.2	hCoV-19/Hong Kong/HK-HKPU-PU22MC630608/2022	EPI_ISL_12418736
2022-02-11	BA.2.2	hCoV-19/Hong Kong/HK-HKPU-PU22MC632403/2022	EPI_ISL_12418737
2022-02-11	BA.2.2	hCoV-19/Hong Kong/HK-HKPU-PU22MC633319/2022	EPI_ISL_12418738
2022-02-11	BA.2.2	hCoV-19/Hong Kong/HK-HKPU-PU22MC633382/2022	EPI_ISL_12418739
2022-02-11	BA.2.2	hCoV-19/Hong Kong/HK-HKPU-PU22MC631840/2022	EPI_ISL_12418740
2022-02-11	BA.2.2	hCoV-19/Hong Kong/HK-HKPU-PU22MC631477/2022	EPI_ISL_12418741
2022-02-11	BA.2.2	hCoV-19/Hong Kong/HK-HKPU-PU22MC632230/2022	EPI_ISL_12418742
2022-02-11	BA.2.2	hCoV-19/Hong Kong/HK-HKPU-PU22MC632295/2022	EPI_ISL_12418743
2022-02-11	BA.2.2	hCoV-19/Hong Kong/HK-HKPU-PU22MB305697/2022	EPI_ISL_12418407
2022-02-11	BA.2.2	hCoV-19/Hong Kong/HK-HKPU-PU22MB307091/2022	EPI_ISL_12418744
2022-02-11	BA.2.2	hCoV-19/Hong Kong/HK-HKPU-PU22MB307673/2022	EPI_ISL_12418745
2022-02-11	BA.2.2	hCoV-19/Hong Kong/HK-HKPU-PU22MC632262/2022	EPI_ISL_12418746
2022-02-14	BA.2.2	hCoV-19/Hong Kong/HK-HKPU-PU22TM243136/2022	EPI_ISL_12418747
2022-03-03	BA.2.2	hCoV-19/Hong Kong/HK-HKPU-PU22MC673563/2022	EPI_ISL_15684515
2022-03-04	BA.2.2	hCoV-19/Hong Kong/HK-HKPU-PU22MC675970/2022	EPI_ISL_15680089
2022-03-16	BA.2.2	hCoV-19/Hong Kong/HK-HKPU-PU22MC683144/2022	EPI_ISL_12419083
2022-03-16	BA.2.2	hCoV-19/Hong Kong/HK-HKPU-PU22MC683160/2022	EPI_ISL_12419084
2022-03-16	BA.2.2	hCoV-19/Hong Kong/HK-HKPU-PU22MC683170/2022	EPI_ISL_12419085
2022-03-16	BA.2.2	hCoV-19/Hong Kong/HK-HKPU-PU22MC683172/2022	EPI_ISL_12419051
2022-03-16	BA.2.2	hCoV-19/Hong Kong/HK-HKPU-PU22MC683175/2022	EPI_ISL_12419052
2022-03-16	BA.2.2	hCoV-19/Hong Kong/HK-HKPU-PU22MC683176/2022	EPI_ISL_12419053
2022-03-16	BA.2.2	hCoV-19/Hong Kong/HK-HKPU-PU22MC683178/2022	EPI_ISL_12419054
2022-03-16	BA.2.2	hCoV-19/Hong Kong/HK-HKPU-PU22MC683179/2022	EPI_ISL_12419055
2022-03-16	BA.2.2	hCoV-19/Hong Kong/HK-HKPU-PU22MC683180/2022	EPI_ISL_12419056
2022-03-16	BA.2.2	hCoV-19/Hong Kong/HK-HKPU-PU22MC683185/2022	EPI_ISL_12419057
2022-03-16	BA.2.2	hCoV-19/Hong Kong/HK-HKPU-PU22MC683187/2022	EPI_ISL_12419058
2022-03-16	BA.2.2	hCoV-19/Hong Kong/HK-HKPU-PU22MC683208/2022	EPI_ISL_12419059
2022-03-16	BA.2.2	hCoV-19/Hong Kong/HK-HKPU-PU22MC683223/2022	EPI_ISL_12419060
2022-03-16	BA.2.2	hCoV-19/Hong Kong/HK-HKPU-PU22MC686184/2022	EPI_ISL_12419061
2022-03-16	BA.2.2	hCoV-19/Hong Kong/HK-HKPU-PU22MC686185/2022	EPI_ISL_12419062
2022-03-16	BA.2.2	hCoV-19/Hong Kong/HK-HKPU-PU22MC686193/2022	EPI_ISL_12419063
2022-03-16	BA.2.2	hCoV-19/Hong Kong/HK-HKPU-PU22MC686227/2022	EPI_ISL_12419064
2022-03-16	BA.2.2	hCoV-19/Hong Kong/HK-HKPU-PU22MC686233/2022	EPI_ISL_12419065
2022-03-16	BA.2.2	hCoV-19/Hong Kong/HK-HKPU-PU22MC686239/2022	EPI_ISL_12419066
2022-03-16	BA.2.2	hCoV-19/Hong Kong/HK-HKPU-PU22MC686249/2022	EPI_ISL_12419067
2022-03-16	BA.2.2	hCoV-19/Hong Kong/HK-HKPU-PU22MC686260/2022	EPI_ISL_12419068
2022-03-16	BA.2.2	hCoV-19/Hong Kong/HK-HKPU-PU22MC686261/2022	EPI_ISL_12419069
2022-03-16	BA.2.2	hCoV-19/Hong Kong/HK-HKPU-PU22MC686262/2022	EPI_ISL_12419070
2022-03-16	BA.2.2	hCoV-19/Hong Kong/HK-HKPU-PU22MC686264/2022	EPI_ISL_12419071
2022-03-16	BA.2.2	hCoV-19/Hong Kong/HK-HKPU-PU22MC686265/2022	EPI_ISL_12419072
2022-03-16	BA.2.2	hCoV-19/Hong Kong/HK-HKPU-PU22MC686268/2022	EPI_ISL_12419073
2022-03-23	BA.2.2	hCoV-19/Hong Kong/HK-HKPU-PU22MC688392/2022	EPI_ISL_12419105
2022-03-23	BA.2.2	hCoV-19/Hong Kong/HK-HKPU-PU22MC688412/2022	EPI_ISL_12419106
2022-03-23	BA.2.2	hCoV-19/Hong Kong/HK-HKPU-PU22MC688483/2022	EPI_ISL_12419107
2022-03-23	BA.2.2	hCoV-19/Hong Kong/HK-HKPU-PU22MC688609/2022	EPI_ISL_12419108
2022-03-23	BA.2.2	hCoV-19/Hong Kong/HK-HKPU-PU22MC688856/2022	EPI_ISL_12419109
2022-03-23	BA.2.2	hCoV-19/Hong Kong/HK-HKPU-PU22MC689023/2022	EPI_ISL_12419110
2022-03-23	BA.2.2	hCoV-19/Hong Kong/HK-HKPU-PU22MC690040/2022	EPI_ISL_12419111
2022-03-23	BA.2.2	hCoV-19/Hong Kong/HK-HKPU-PU22MB321066/2022	EPI_ISL_12419112
2022-03-23	BA.2.2	hCoV-19/Hong Kong/HK-HKPU-PU22TM309443/2022	EPI_ISL_12419154
2022-03-23	BA.2.2	hCoV-19/Hong Kong/HK-HKPU-PU22TM309631/2022	EPI_ISL_12419155
2022-03-23	BA.2.2	hCoV-19/Hong Kong/HK-HKPU-PU22MC691577/2022	EPI_ISL_12419115
2022-03-23	BA.2.2	hCoV-19/Hong Kong/HK-HKPU-PU22MC691580/2022	EPI_ISL_12419116
2022-03-23	BA.2.2	hCoV-19/Hong Kong/HK-HKPU-PU22MC691582/2022	EPI_ISL_12419117
2022-03-23	BA.2.2	hCoV-19/Hong Kong/HK-HKPU-PU22MC691584/2022	EPI_ISL_12419118
2022-03-23	BA.2.2	hCoV-19/Hong Kong/HK-HKPU-PU22MC691592/2022	EPI_ISL_12419119
2022-03-23	BA.2.2	hCoV-19/Hong Kong/HK-HKPU-PU22MC691594/2022	EPI_ISL_12419120
2022-03-23	BA.2.2	hCoV-19/Hong Kong/HK-HKPU-PU22MC691595/2022	EPI_ISL_12419121
2022-03-23	BA.2.2	hCoV-19/Hong Kong/HK-HKPU-PU22MC691599/2022	EPI_ISL_12419122
2022-03-23	BA.2.2	hCoV-19/Hong Kong/HK-HKPU-PU22MC691601/2022	EPI_ISL_12419123
2022-03-23	BA.2.2	hCoV-19/Hong Kong/HK-HKPU-PU22MC691784/2022	EPI_ISL_12419124
2022-03-23	BA.2.2	hCoV-19/Hong Kong/HK-HKPU-PU22MC691785/2022	EPI_ISL_12419125
2022-03-23	BA.2.2	hCoV-19/Hong Kong/HK-HKPU-PU22MC691787/2022	EPI_ISL_12419126
2022-03-23	BA.2.2	hCoV-19/Hong Kong/HK-HKPU-PU22MC691790/2022	EPI_ISL_12419127
2022-03-23	BA.2.2	hCoV-19/Hong Kong/HK-HKPU-PU22MC691795/2022	EPI_ISL_12419128
2022-03-23	BA.2.2	hCoV-19/Hong Kong/HK-HKPU-PU22MC691796/2022	EPI_ISL_12419129
2022-03-23	BA.2.2	hCoV-19/Hong Kong/HK-HKPU-PU22MC691812/2022	EPI_ISL_12419130
2022-03-23	BA.2.2	hCoV-19/Hong Kong/HK-HKPU-PU22MC691813/2022	EPI_ISL_12419131
2022-03-23	BA.2.2	hCoV-19/Hong Kong/HK-HKPU-PU22MC691822/2022	EPI_ISL_12419132
2022-03-23	BA.2.2	hCoV-19/Hong Kong/HK-HKPU-PU22MC691834/2022	EPI_ISL_12419133
2022-03-23	BA.2.2	hCoV-19/Hong Kong/HK-HKPU-PU22MC691846/2022	EPI_ISL_12419134
2022-03-23	BA.2.2	hCoV-19/Hong Kong/HK-HKPU-PU22MC691848/2022	EPI_ISL_12419135
2022-03-23	BA.2.2	hCoV-19/Hong Kong/HK-HKPU-PU22MC691858/2022	EPI_ISL_12419136
2022-03-24	BA.2.2	hCoV-19/Hong Kong/HK-HKPU-PU22TM310009/2022	EPI_ISL_12419156
2022-03-25	BA.2.2	hCoV-19/Hong Kong/HK-HKPU-PU22TM310649/2022	EPI_ISL_12419157
2022-03-25	BA.2.2	hCoV-19/Hong Kong/HK-HKPU-PU22TM311054/2022	EPI_ISL_12419158
2022-03-27	BA.2.2	hCoV-19/Hong Kong/HK-HKPU-PU22TM311717/2022	EPI_ISL_12419159
2022-04-03	BA.2.2	hCoV-19/Hong Kong/HK-HKPU-PU22MC697915/2022	EPI_ISL_12419197
2022-04-04	BA.2.2	hCoV-19/Hong Kong/HK-HKPU-PU22MB323788/2022	EPI_ISL_12419204
2022-04-04	BA.2.2	hCoV-19/Hong Kong/HK-HKPU-PU22MC698032/2022	EPI_ISL_12419205
2022-04-04	BA.2.2	hCoV-19/Hong Kong/HK-HKPU-PU22MC698129/2022	EPI_ISL_12419206
2022-04-04	BA.2.2	hCoV-19/Hong Kong/HK-HKPU-PU22MC698226/2022	EPI_ISL_12419207
2022-04-04	BA.2.2	hCoV-19/Hong Kong/HK-HKPU-PU22MC698309/2022	EPI_ISL_12419208
2022-04-04	BA.2.2	hCoV-19/Hong Kong/HK-HKPU-PU22MC698315/2022	EPI_ISL_12419209
2022-04-04	BA.2.2	hCoV-19/Hong Kong/HK-HKPU-PU22MC698534/2022	EPI_ISL_12419210
2022-04-05	BA.2.2	hCoV-19/Hong Kong/HK-HKPU-PU22MB323936/2022	EPI_ISL_12419219
2022-04-05	BA.2.2	hCoV-19/Hong Kong/HK-HKPU-PU22MC698669/2022	EPI_ISL_12419220
2022-04-05	BA.2.2	hCoV-19/Hong Kong/HK-HKPU-PU22MC698765/2022	EPI_ISL_12419221
2022-04-05	BA.2.2	hCoV-19/Hong Kong/HK-HKPU-PU22MC698819/2022	EPI_ISL_12419222
2022-04-06	BA.2.2	hCoV-19/Hong Kong/HK-HKPU-PU22MB324135/2022	EPI_ISL_12419229
2022-04-06	BA.2.2	hCoV-19/Hong Kong/HK-HKPU-PU22MC699130/2022	EPI_ISL_12419230
2022-04-06	BA.2.2	hCoV-19/Hong Kong/HK-HKPU-PU22MC699352/2022	EPI_ISL_12419231
2022-04-07	BA.2.2	hCoV-19/Hong Kong/HK-HKPU-PU22MC864386/2022	EPI_ISL_12419232
2022-04-07	BA.2.2	hCoV-19/Hong Kong/HK-HKPU-PU22MC864405/2022	EPI_ISL_12419233
2022-04-07	BA.2.2	hCoV-19/Hong Kong/HK-HKPU-PU22MC864432/2022	EPI_ISL_12419234
2022-04-09	BA.2.2	hCoV-19/Hong Kong/HK-HKPU-PU22MC702294/2022	EPI_ISL_12419278
2022-04-09	BA.2.2	hCoV-19/Hong Kong/HK-HKPU-PU22MC702307/2022	EPI_ISL_12419279
2022-04-09	BA.2.2	hCoV-19/Hong Kong/HK-HKPU-PU22MC702451/2022	EPI_ISL_12419280
2022-04-09	BA.2.2	hCoV-19/Hong Kong/HK-HKPU-PU22MC702588/2022	EPI_ISL_12419281
2022-04-10	BA.2.2	hCoV-19/Hong Kong/HK-HKPU-PU22MC702804/2022	EPI_ISL_12419296
2022-04-10	BA.2.2	hCoV-19/Hong Kong/HK-HKPU-PU22MC702805/2022	EPI_ISL_12419297
2022-04-10	BA.2.2	hCoV-19/Hong Kong/HK-HKPU-PU22MC702661/2022	EPI_ISL_12419298
2022-04-10	BA.2.2	hCoV-19/Hong Kong/HK-HKPU-PU22MC864574/2022	EPI_ISL_12419299
2022-04-10	BA.2.2	hCoV-19/Hong Kong/HK-HKPU-PU22MC864575/2022	EPI_ISL_12419300
2022-04-10	BA.2.2	hCoV-19/Hong Kong/HK-HKPU-PU22MC864556/2022	EPI_ISL_12419301
2022-04-11	BA.2.2	hCoV-19/Hong Kong/HK-HKPU-PU22MC703207/2022	EPI_ISL_12419304
2022-04-11	BA.2.2	hCoV-19/Hong Kong/HK-HKPU-PU22MC703293/2022	EPI_ISL_12419305
2022-04-11	BA.2.2	hCoV-19/Hong Kong/HK-HKPU-PU22MC703447/2022	EPI_ISL_12419306
2022-04-11	BA.2.2	hCoV-19/Hong Kong/HK-HKPU-PU22MC703548/2022	EPI_ISL_12419307
2022-04-11	BA.2.2	hCoV-19/Hong Kong/HK-HKPU-PU22MC703545/2022	EPI_ISL_12419308
2022-04-11	BA.2.2	hCoV-19/Hong Kong/HK-HKPU-PU22MC703519/2022	EPI_ISL_12419309
2022-04-12	BA.2.2	hCoV-19/Hong Kong/HK-HKPU-PU22MC703896/2022	EPI_ISL_12419310
2022-04-13	BA.2.2	hCoV-19/Hong Kong/HK-HKPU-PU22MC704210/2022	EPI_ISL_12419311
2022-04-13	BA.2.2	hCoV-19/Hong Kong/HK-HKPU-PU22MB325186/2022	EPI_ISL_12419312
2022-04-13	BA.2.2	hCoV-19/Hong Kong/HK-HKPU-PU22MB325191/2022	EPI_ISL_12419313
2022-04-13	BA.2.2	hCoV-19/Hong Kong/HK-HKPU-PU22MC704353/2022	EPI_ISL_12419314
2022-04-14	BA.2.2	hCoV-19/Hong Kong/HK-HKPU-PU22MC704695/2022	EPI_ISL_13140472
2022-04-14	BA.2.2	hCoV-19/Hong Kong/HK-HKPU-PU22MC704804/2022	EPI_ISL_13140473
2022-04-14	BA.2.2	hCoV-19/Hong Kong/HK-HKPU-PU22MC704801/2022	EPI_ISL_13140474
2022-04-15	BA.2.2	hCoV-19/Hong Kong/HK-HKPU-PU22MB325534/2022	EPI_ISL_13140475
2022-04-15	BA.2.2	hCoV-19/Hong Kong/HK-HKPU-PU22MC704992/2022	EPI_ISL_13140476
2022-04-15	BA.2.2	hCoV-19/Hong Kong/HK-HKPU-PU22MC705019/2022	EPI_ISL_13140477
2022-04-16	BA.2.2	hCoV-19/Hong Kong/HK-HKPU-PU22MC705230/2022	EPI_ISL_13140478
2022-04-16	BA.2.2	hCoV-19/Hong Kong/HK-HKPU-PU22MB325676/2022	EPI_ISL_13140479
2022-04-16	BA.2.2	hCoV-19/Hong Kong/HK-HKPU-PU22MB325677/2022	EPI_ISL_13140480
2022-04-16	BA.2.2	hCoV-19/Hong Kong/HK-HKPU-PU22MC705271/2022	EPI_ISL_13140481
2022-04-16	BA.2.2	hCoV-19/Hong Kong/HK-HKPU-PU22MB325701/2022	EPI_ISL_13140482
2022-04-17	BA.2.2	hCoV-19/Hong Kong/HK-HKPU-PU22MB325723/2022	EPI_ISL_13140483
2022-04-17	BA.2.2	hCoV-19/Hong Kong/HK-HKPU-PU22MC705308/2022	EPI_ISL_13140486
2022-04-17	BA.2.2	hCoV-19/Hong Kong/HK-HKPU-PU22MB325750/2022	EPI_ISL_13140487
2022-04-17	BA.2.2	hCoV-19/Hong Kong/HK-HKPU-PU22MB325751/2022	EPI_ISL_13140488
2022-04-17	BA.2.2	hCoV-19/Hong Kong/HK-HKPU-PU22MC705323/2022	EPI_ISL_13140489
2022-04-17	BA.2.2	hCoV-19/Hong Kong/HK-HKPU-PU22MC705325/2022	EPI_ISL_13140490
2022-04-18	BA.2.2	hCoV-19/Hong Kong/HK-HKPU-PU22MB325902/2022	EPI_ISL_13140491
2022-04-18	BA.2.2	hCoV-19/Hong Kong/HK-HKPU-PU22MB325910/2022	EPI_ISL_13140492
2022-04-18	BA.2.2	hCoV-19/Hong Kong/HK-HKPU-PU22MB325926/2022	EPI_ISL_13141010
2022-04-18	BA.2.2	hCoV-19/Hong Kong/HK-HKPU-PU22MC705847/2022	EPI_ISL_13141017
2022-04-18	BA.2.2	hCoV-19/Hong Kong/HK-HKPU-PU22MC865167/2022	EPI_ISL_13141018
2022-04-19	BA.2.2	hCoV-19/Hong Kong/HK-HKPU-PU22MC705904/2022	EPI_ISL_13141019
2022-04-19	BA.2.2	hCoV-19/Hong Kong/HK-HKPU-PU22MC706183/2022	EPI_ISL_13141020
2022-04-19	BA.2.2	hCoV-19/Hong Kong/HK-HKPU-PU22MB326213/2022	EPI_ISL_13141021
2022-04-19	BA.2.2	hCoV-19/Hong Kong/HK-HKPU-PU22MC706340/2022	EPI_ISL_13141022
2022-04-20	BA.2.2	hCoV-19/Hong Kong/HK-HKPU-PU22MB326244/2022	EPI_ISL_13141023
2022-04-20	BA.2.2	hCoV-19/Hong Kong/HK-HKPU-PU22MC706414/2022	EPI_ISL_13141024
2022-04-20	BA.2.2	hCoV-19/Hong Kong/HK-HKPU-PU22MB326277/2022	EPI_ISL_13141025
2022-04-21	BA.2.2	hCoV-19/Hong Kong/HK-HKPU-PU22MB326471/2022	EPI_ISL_13141026
2022-04-21	BA.2.2	hCoV-19/Hong Kong/HK-HKPU-PU22MC706936/2022	EPI_ISL_13141027
2022-04-21	BA.2.2	hCoV-19/Hong Kong/HK-HKPU-PU22MC707019/2022	EPI_ISL_13141028
2022-04-21	BA.2.2	hCoV-19/Hong Kong/HK-HKPU-PU22MC865395/2022	EPI_ISL_13141029
2022-04-21	BA.2.2	hCoV-19/Hong Kong/HK-HKPU-PU22MC865407/2022	EPI_ISL_13141030
2022-04-22	BA.2.2	hCoV-19/Hong Kong/HK-HKPU-PUN682509844/2022	EPI_ISL_12810033
2022-04-22	BA.2.2	hCoV-19/Hong Kong/HK-HKPU-PUN684928909/2022	EPI_ISL_12810034
2022-04-22	BA.2.2	hCoV-19/Hong Kong/HK-HKPU-PUN515635610/2022	EPI_ISL_12810035
2022-04-22	BA.2.2	hCoV-19/Hong Kong/HK-HKPU-PUN513673191/2022	EPI_ISL_12810036
2022-04-22	BA.2.2	hCoV-19/Hong Kong/HK-HKPU-PU22MC865417/2022	EPI_ISL_13141031
2022-04-22	BA.2.2	hCoV-19/Hong Kong/HK-HKPU-PU22MC707329/2022	EPI_ISL_13141032
2022-04-22	BA.2.2	hCoV-19/Hong Kong/HK-HKPU-PU22MB326761/2022	EPI_ISL_13141033
2022-04-22	BA.2.2	hCoV-19/Hong Kong/HK-HKPU-PU22MC707281/2022	EPI_ISL_13141034
2022-04-22	BA.2.2	hCoV-19/Hong Kong/HK-HKPU-PU22MB326861/2022	EPI_ISL_13141035
2022-04-22	BA.2.2	hCoV-19/Hong Kong/HK-HKPU-PU22MB326867/2022	EPI_ISL_13141036
2022-04-23	BA.2.2	hCoV-19/Hong Kong/HK-HKPU-PUN513642288/2022	EPI_ISL_12810037
2022-04-23	BA.2.2	hCoV-19/Hong Kong/HK-HKPU-PUN513576447/2022	EPI_ISL_12810038
2022-04-23	BA.2.2	hCoV-19/Hong Kong/HK-HKPU-PUN515569057/2022	EPI_ISL_12810039
2022-04-23	BA.2.2	hCoV-19/Hong Kong/HK-HKPU-PUN51041876A/2022	EPI_ISL_12810040
2022-04-23	BA.2.2	hCoV-19/Hong Kong/HK-HKPU-PUN515265538/2022	EPI_ISL_12810041
2022-04-23	BA.2.2	hCoV-19/Hong Kong/HK-HKPU-PUN515568786/2022	EPI_ISL_12810078
2022-04-23	BA.2.2	hCoV-19/Hong Kong/HK-HKPU-PUN68435290A/2022	EPI_ISL_12810079
2022-04-23	BA.2.2	hCoV-19/Hong Kong/HK-HKPU-PU22MC707512/2022	EPI_ISL_13141037
2022-04-23	BA.2.2	hCoV-19/Hong Kong/HK-HKPU-PU22MC707732/2022	EPI_ISL_13141038
2022-04-23	BA.2.2	hCoV-19/Hong Kong/HK-HKPU-PU22MC707733/2022	EPI_ISL_13141039
2022-04-23	BA.2.2	hCoV-19/Hong Kong/HK-HKPU-PU22MB327027/2022	EPI_ISL_13141040
2022-04-23	BA.2.2	hCoV-19/Hong Kong/HK-HKPU-PU22MC865536/2022	EPI_ISL_13141041
2022-04-24	BA.2.2	hCoV-19/Hong Kong/HK-HKPU-PUN515868135/2022	EPI_ISL_12810080
2022-04-24	BA.2.2	hCoV-19/Hong Kong/HK-HKPU-PUN384640381/2022	EPI_ISL_12810081
2022-04-24	BA.2.2	hCoV-19/Hong Kong/HK-HKPU-PUN51040565A/2022	EPI_ISL_12810082
2022-04-24	BA.2.2	hCoV-19/Hong Kong/HK-HKPU-PUN515268847/2022	EPI_ISL_12810083
2022-04-24	BA.2.2	hCoV-19/Hong Kong/HK-HKPU-PUN514129894/2022	EPI_ISL_12810084
2022-04-24	BA.2.2	hCoV-19/Hong Kong/HK-HKPU-PUN514593205/2022	EPI_ISL_12810085
2022-04-24	BA.2.2	hCoV-19/Hong Kong/HK-HKPU-PUN510832043/2022	EPI_ISL_12810086
2022-04-24	BA.2.2	hCoV-19/Hong Kong/HK-HKPU-PU22MB327052/2022	EPI_ISL_13141042
2022-04-24	BA.2.2	hCoV-19/Hong Kong/HK-HKPU-PU22MB327165/2022	EPI_ISL_13141043
2022-04-24	BA.2.2	hCoV-19/Hong Kong/HK-HKPU-PU22MC707971/2022	EPI_ISL_13141044
2022-04-25	BA.2.2	hCoV-19/Hong Kong/HK-HKPU-PUN516092971/2022	EPI_ISL_12810087
2022-04-25	BA.2.2	hCoV-19/Hong Kong/HK-HKPU-PUN384432290/2022	EPI_ISL_12810088
2022-04-25	BA.2.2	hCoV-19/Hong Kong/HK-HKPU-PUN685330438/2022	EPI_ISL_12810089
2022-04-25	BA.2.2	hCoV-19/Hong Kong/HK-HKPU-PU22MC865642/2022	EPI_ISL_13141045
2022-04-25	BA.2.2	hCoV-19/Hong Kong/HK-HKPU-PU22MB327262/2022	EPI_ISL_13141046
2022-04-25	BA.2.2	hCoV-19/Hong Kong/HK-HKPU-PU22MB327362/2022	EPI_ISL_13141047
2022-04-25	BA.2.2	hCoV-19/Hong Kong/HK-HKPU-PU22MC708428/2022	EPI_ISL_13141048
2022-04-25	BA.2.2	hCoV-19/Hong Kong/HK-HKPU-PU22MC708432/2022	EPI_ISL_13141049
2022-04-26	BA.2.2	hCoV-19/Hong Kong/HK-HKPU-PUN510420985/2022	EPI_ISL_12839569
2022-04-26	BA.2.2	hCoV-19/Hong Kong/HK-HKPU-PUN510426207/2022	EPI_ISL_12839570
2022-04-26	BA.2.2	hCoV-19/Hong Kong/HK-HKPU-PUN513742630/2022	EPI_ISL_12839571
2022-04-26	BA.2.2	hCoV-19/Hong Kong/HK-HKPU-PUN513742762/2022	EPI_ISL_12839572
2022-04-26	BA.2.2	hCoV-19/Hong Kong/HK-HKPU-PU22MC708828/2022	EPI_ISL_13141050
2022-04-26	BA.2.2	hCoV-19/Hong Kong/HK-HKPU-PU22MC708857/2022	EPI_ISL_13141051
2022-04-26	BA.2.2	hCoV-19/Hong Kong/HK-HKPU-PU22MC708900/2022	EPI_ISL_13141052
2022-04-26	BA.2.2	hCoV-19/Hong Kong/HK-HKPU-PU22MC865757/2022	EPI_ISL_13141053
2022-04-27	BA.2.2	hCoV-19/Hong Kong/HK-HKPU-PUN515570683/2022	EPI_ISL_12839573
2022-04-27	BA.2.2	hCoV-19/Hong Kong/HK-HKPU-PUN516587520/2022	EPI_ISL_12839574
2022-04-27	BA.2.2	hCoV-19/Hong Kong/HK-HKPU-PU22MC709009/2022	EPI_ISL_13141054
2022-04-27	BA.2.2	hCoV-19/Hong Kong/HK-HKPU-PU22MC709224/2022	EPI_ISL_13141055
2022-04-28	BA.2.2	hCoV-19/Hong Kong/HK-HKPU-PUN516687223/2022	EPI_ISL_12839575
2022-04-28	BA.2.2	hCoV-19/Hong Kong/HK-HKPU-PUN513281528/2022	EPI_ISL_12839576
2022-04-29	BA.2.2	hCoV-19/Hong Kong/HK-HKPU-PUN513280378/2022	EPI_ISL_12839577
2022-04-29	BA.2.2	hCoV-19/Hong Kong/HK-HKPU-PUN515549110/2022	EPI_ISL_12839578
2022-04-29	BA.2.2	hCoV-19/Hong Kong/HK-HKPU-PUN516523255/2022	EPI_ISL_12839579
2022-04-29	BA.2.2	hCoV-19/Hong Kong/HK-HKPU-PU22MB328217/2022	EPI_ISL_13141056
2022-04-29	BA.2.2	hCoV-19/Hong Kong/HK-HKPU-PU22MC709899/2022	EPI_ISL_13141057
2022-04-29	BA.2.2	hCoV-19/Hong Kong/HK-HKPU-PU22MB328380/2022	EPI_ISL_13141058
2022-04-29	BA.2.2	hCoV-19/Hong Kong/HK-HKPU-PU22MC710006/2022	EPI_ISL_13141059
2022-04-30	BA.2.2	hCoV-19/Hong Kong/HK-HKPU-PUN511988608/2022	EPI_ISL_12839580
2022-04-30	BA.2.2	hCoV-19/Hong Kong/HK-HKPU-PUN684617601/2022	EPI_ISL_12839581
2022-04-30	BA.2.2	hCoV-19/Hong Kong/HK-HKPU-PUN512205461/2022	EPI_ISL_12839582
2022-04-30	BA.2.2	hCoV-19/Hong Kong/HK-HKPU-PUN51291215A/2022	EPI_ISL_12839583
2022-04-30	BA.2.2	hCoV-19/Hong Kong/HK-HKPU-PUN516588071/2022	EPI_ISL_12839584
2022-04-30	BA.2.2	hCoV-19/Hong Kong/HK-HKPU-PUN511989876/2022	EPI_ISL_12839585
2022-04-30	BA.2.2	hCoV-19/Hong Kong/HK-HKPU-PUN516588063/2022	EPI_ISL_12839586
2022-04-30	BA.2.2	hCoV-19/Hong Kong/HK-HKPU-PU22MB328584/2022	EPI_ISL_13141060
2022-04-30	BA.2.2	hCoV-19/Hong Kong/HK-HKPU-PU22MB328630/2022	EPI_ISL_13141061
2022-05-01	BA.2.2	hCoV-19/Hong Kong/HK-HKPU-PUN510807936/2022	EPI_ISL_12839587
2022-05-01	BA.2.2	hCoV-19/Hong Kong/HK-HKPU-PUN514278733/2022	EPI_ISL_12839588
2022-05-01	BA.2.2	hCoV-19/Hong Kong/HK-HKPU-PUN512937683/2022	EPI_ISL_12839589
2022-05-01	BA.2.2	hCoV-19/Hong Kong/HK-HKPU-PUN281646603/2022	EPI_ISL_12839590
2022-05-01	BA.2.2	hCoV-19/Hong Kong/HK-HKPU-PU22MB328814/2022	EPI_ISL_13141062
2022-05-02	BA.2.2	hCoV-19/Hong Kong/HK-HKPU-PUN511276020/2022	EPI_ISL_12839591
2022-05-02	BA.2.2	hCoV-19/Hong Kong/HK-HKPU-PUN38507424A/2022	EPI_ISL_12839592
2022-05-02	BA.2.2	hCoV-19/Hong Kong/HK-HKPU-PUN512033628/2022	EPI_ISL_12839593
2022-05-02	BA.2.2	hCoV-19/Hong Kong/HK-HKPU-PUN512035752/2022	EPI_ISL_12839594
2022-05-02	BA.2.2	hCoV-19/Hong Kong/HK-HKPU-PU22MB328885/2022	EPI_ISL_13141063
2022-05-02	BA.2.2	hCoV-19/Hong Kong/HK-HKPU-PU22MB328890/2022	EPI_ISL_13141064
2022-05-02	BA.2.2	hCoV-19/Hong Kong/HK-HKPU-PU22MC710835/2022	EPI_ISL_13141065
2022-05-03	BA.2.2	hCoV-19/Hong Kong/HK-HKPU-PUN383559955/2022	EPI_ISL_13140345
2022-05-03	BA.2.2	hCoV-19/Hong Kong/HK-HKPU-PUN512526985/2022	EPI_ISL_13140346
2022-05-03	BA.2.2	hCoV-19/Hong Kong/HK-HKPU-PUN511876117/2022	EPI_ISL_13140347
2022-05-03	BA.2.2	hCoV-19/Hong Kong/HK-HKPU-PUN512520979/2022	EPI_ISL_13140348
2022-05-03	BA.2.2	hCoV-19/Hong Kong/HK-HKPU-PUN515693319/2022	EPI_ISL_13140349
2022-05-03	BA.2.2	hCoV-19/Hong Kong/HK-HKPU-PU22MC711007/2022	EPI_ISL_13141066
2022-05-03	BA.2.2	hCoV-19/Hong Kong/HK-HKPU-PU22MC711303/2022	EPI_ISL_13141067
2022-05-03	BA.2.2	hCoV-19/Hong Kong/HK-HKPU-PU22MC866204/2022	EPI_ISL_13694132
2022-05-04	BA.2.2	hCoV-19/Hong Kong/HK-HKPU-PUN68507735A/2022	EPI_ISL_13140350
2022-05-05	BA.2.2	hCoV-19/Hong Kong/HK-HKPU-PUN510813898/2022	EPI_ISL_13140351
2022-05-06	BA.2.2	hCoV-19/Hong Kong/HK-HKPU-PUN513592876/2022	EPI_ISL_13140352
2022-05-06	BA.2.2	hCoV-19/Hong Kong/HK-HKPU-PUN512692532/2022	EPI_ISL_13140353
2022-05-06	BA.2.2	hCoV-19/Hong Kong/HK-HKPU-PUN516702621/2022	EPI_ISL_13140354
2022-05-06	BA.2.2	hCoV-19/Hong Kong/HK-HKPU-PU22MB329874/2022	EPI_ISL_13694133
2022-05-06	BA.2.2	hCoV-19/Hong Kong/HK-HKPU-PU22MB329910/2022	EPI_ISL_13694134
2022-05-06	BA.2.2	hCoV-19/Hong Kong/HK-HKPU-PU22MB330057/2022	EPI_ISL_13694135
2022-05-07	BA.2.2	hCoV-19/Hong Kong/HK-HKPU-PUN515672060/2022	EPI_ISL_13140355
2022-05-07	BA.2.2	hCoV-19/Hong Kong/HK-HKPU-PU22MC866465/2022	EPI_ISL_13694136
2022-05-07	BA.2.2	hCoV-19/Hong Kong/HK-HKPU-PU22MC866492/2022	EPI_ISL_13694137
2022-05-07	BA.2.2	hCoV-19/Hong Kong/HK-HKPU-PU22MB330121/2022	EPI_ISL_14226772
2022-05-08	BA.2.2	hCoV-19/Hong Kong/HK-HKPU-PUN515006583/2022	EPI_ISL_13140356
2022-05-08	BA.2.2	hCoV-19/Hong Kong/HK-HKPU-PUN383665410/2022	EPI_ISL_13140357
2022-05-09	BA.2.2	hCoV-19/Hong Kong/HK-HKPU-PUN684097268/2022	EPI_ISL_13140358
2022-05-09	BA.2.2	hCoV-19/Hong Kong/HK-HKPU-PU22MB330544/2022	EPI_ISL_14226773
2022-05-09	BA.2.2	hCoV-19/Hong Kong/HK-HKPU-PU22MC712811/2022	EPI_ISL_14226774
2022-05-09	BA.2.2	hCoV-19/Hong Kong/HK-HKPU-PU22MB330644/2022	EPI_ISL_14226863
2022-05-09	BA.2.2	hCoV-19/Hong Kong/HK-HKPU-PU22MB330622/2022	EPI_ISL_14226864
2022-05-09	BA.2.2	hCoV-19/Hong Kong/HK-HKPU-PU22MC713093/2022	EPI_ISL_14226865
2022-05-09	BA.2.2	hCoV-19/Hong Kong/HK-HKPU-PU22MB330696/2022	EPI_ISL_14226866
2022-05-10	BA.2.2	hCoV-19/Hong Kong/HK-HKPU-PU22MC713486/2022	EPI_ISL_13140528
2022-05-10	BA.2.2	hCoV-19/Hong Kong/HK-HKPU-PU22MC713188/2022	EPI_ISL_14226867
2022-05-10	BA.2.2	hCoV-19/Hong Kong/HK-HKPU-PU22MB330710/2022	EPI_ISL_14226868
2022-05-10	BA.2.2	hCoV-19/Hong Kong/HK-HKPU-PU22MC713352/2022	EPI_ISL_14226869
2022-05-10	BA.2.2	hCoV-19/Hong Kong/HK-HKPU-PU22MC713593/2022	EPI_ISL_14226870
2022-05-11	BA.2.2	hCoV-19/Hong Kong/HK-HKPU-PUN510824970/2022	EPI_ISL_13140359
2022-05-11	BA.2.2	hCoV-19/Hong Kong/HK-HKPU-PUN385086701/2022	EPI_ISL_13140360
2022-05-11	BA.2.2	hCoV-19/Hong Kong/HK-HKPU-PUN385109566/2022	EPI_ISL_13140361
2022-05-11	BA.2.2	hCoV-19/Hong Kong/HK-HKPU-PUN51495822A/2022	EPI_ISL_13140459
2022-05-12	BA.2.2	hCoV-19/Hong Kong/HK-HKPU-PUN514030081/2022	EPI_ISL_13140460
2022-05-12	BA.2.2	hCoV-19/Hong Kong/HK-HKPU-PU22MC866832/2022	EPI_ISL_14226871
2022-05-13	BA.2.2	hCoV-19/Hong Kong/HK-HKPU-PUN684094803/2022	EPI_ISL_13140461
2022-05-13	BA.2.2	hCoV-19/Hong Kong/HK-HKPU-PUN510682297/2022	EPI_ISL_13140462
2022-05-13	BA.2.2	hCoV-19/Hong Kong/HK-HKPU-PU22MC714783/2022	EPI_ISL_14226872
2022-05-15	BA.2.2	hCoV-19/Hong Kong/HK-HKPU-PUN513307012/2022	EPI_ISL_13140463
2022-05-16	BA.2.2	hCoV-19/Hong Kong/HK-HKPU-PU22TM321926/2022	EPI_ISL_13140524
2022-05-16	BA.2.2	hCoV-19/Hong Kong/HK-HKPU-PUN509567927/2022	EPI_ISL_13141069
2022-05-16	BA.2.2	hCoV-19/Hong Kong/HK-HKPU-PUN383461130/2022	EPI_ISL_13141070
2022-05-16	BA.2.2	hCoV-19/Hong Kong/HK-HKPU-PUN516030542/2022	EPI_ISL_13141071
2022-05-16	BA.2.2	hCoV-19/Hong Kong/HK-HKPU-PU22MB332115/2022	EPI_ISL_14226873
2022-05-16	BA.2.2	hCoV-19/Hong Kong/HK-HKPU-PU22MB332174/2022	EPI_ISL_14226874
2022-05-16	BA.2.2	hCoV-19/Hong Kong/HK-HKPU-PU22MB332269/2022	EPI_ISL_14226875
2022-05-16	BA.2.2	hCoV-19/Hong Kong/HK-HKPU-PU22MC715561/2022	EPI_ISL_14226876
2022-05-17	BA.2.2	hCoV-19/Hong Kong/HK-HKPU-PUN514977224/2022	EPI_ISL_13141072
2022-05-17	BA.2.2	hCoV-19/Hong Kong/HK-HKPU-PU22MC866996/2022	EPI_ISL_14226877
2022-05-17	BA.2.20	hCoV-19/Hong Kong/HK-HKPU-PU22MC867144/2022	EPI_ISL_14226878
2022-05-18	BA.2.2	hCoV-19/Hong Kong/HK-HKPU-PUN384017242/2022	EPI_ISL_13141073
2022-05-18	BA.2.2	hCoV-19/Hong Kong/HK-HKPU-PUN512475485/2022	EPI_ISL_13141074
2022-05-19	BA.2.2	hCoV-19/Hong Kong/HK-HKPU-PUN515726047/2022	EPI_ISL_13141075
2022-05-19	BA.2.2	hCoV-19/Hong Kong/HK-HKPU-PUN515725660/2022	EPI_ISL_13141076
2022-05-19	BA.2.2	hCoV-19/Hong Kong/HK-HKPU-PUN516604115/2022	EPI_ISL_13141077
2022-05-19	BA.2.2	hCoV-19/Hong Kong/HK-HKPU-PUN514977038/2022	EPI_ISL_13141078
2022-05-19	BA.2.2	hCoV-19/Hong Kong/HK-HKPU-PU22MB332908/2022	EPI_ISL_14215003
2022-05-19	BA.2.2	hCoV-19/Hong Kong/HK-HKPU-PU22MB332959/2022	EPI_ISL_14215004
2022-05-19	BA.2.2	hCoV-19/Hong Kong/HK-HKPU-PU22MC867370/2022	EPI_ISL_14215005
2022-05-20	BA.2.2	hCoV-19/Hong Kong/HK-HKPU-PUN383576949/2022	EPI_ISL_13141079
2022-05-20	BA.2.2	hCoV-19/Hong Kong/HK-HKPU-PUN515717463/2022	EPI_ISL_13141085
2022-05-20	BA.2.2	hCoV-19/Hong Kong/HK-HKPU-PU22MB333235/2022	EPI_ISL_14215006
2022-05-20	BA.2.2	hCoV-19/Hong Kong/HK-HKPU-PU22MC867426/2022	EPI_ISL_14215007
2022-05-21	BA.2.2	hCoV-19/Hong Kong/HK-HKPU-PUN684537713/2022	EPI_ISL_13141080
2022-05-21	BA.2.2	hCoV-19/Hong Kong/HK-HKPU-PU22MC717266/2022	EPI_ISL_14215008
2022-05-21	BA.2.2	hCoV-19/Hong Kong/HK-HKPU-PU22MC717306/2022	EPI_ISL_14215009
2022-05-22	BA.2.2	hCoV-19/Hong Kong/HK-HKPU-PUN516388218/2022	EPI_ISL_13141081
2022-05-22	BA.2.2	hCoV-19/Hong Kong/HK-HKPU-PU22MB333610/2022	EPI_ISL_14215010
2022-05-23	BA.2.12.1	hCoV-19/Hong Kong/HK-HKPU-PU22TM715233/2022	EPI_ISL_13141068
2022-05-23	BA.2.2	hCoV-19/Hong Kong/HK-HKPU-PUN519931990/2022	EPI_ISL_13141082
2022-05-23	BA.2.2	hCoV-19/Hong Kong/HK-HKPU-PUN511754003/2022	EPI_ISL_13141083
2022-05-23	BA.2.2	hCoV-19/Hong Kong/HK-HKPU-PUN512511872/2022	EPI_ISL_13141084
2022-05-23	BA.2.2	hCoV-19/Hong Kong/HK-HKPU-PU22MB333967/2022	EPI_ISL_14215011
2022-05-23	BA.2.2	hCoV-19/Hong Kong/HK-HKPU-PU22MB333976/2022	EPI_ISL_14215012
2022-05-24	BA.2.2	hCoV-19/Hong Kong/HK-HKPU-PUN512470041/2022	EPI_ISL_13696547
2022-05-24	BA.2.2	hCoV-19/Hong Kong/HK-HKPU-PUN519985683/2022	EPI_ISL_13696548
2022-05-24	BA.2.2	hCoV-19/Hong Kong/HK-HKPU-PU22MC718145/2022	EPI_ISL_14215013
2022-05-24	BA.2.2	hCoV-19/Hong Kong/HK-HKPU-PU22MC718244/2022	EPI_ISL_14215014
2022-05-25	BA.2.2	hCoV-19/Hong Kong/HK-HKPU-PU22MB334326/2022	EPI_ISL_13140526
2022-05-25	BA.2.2	hCoV-19/Hong Kong/HK-HKPU-PUN512465781/2022	EPI_ISL_13696549
2022-05-25	BA.2.2	hCoV-19/Hong Kong/HK-HKPU-PUN511450055/2022	EPI_ISL_13696550
2022-05-25	BA.2.2	hCoV-19/Hong Kong/HK-HKPU-PUN513739826/2022	EPI_ISL_13696551
2022-05-25	BA.2.2	hCoV-19/Hong Kong/HK-HKPU-PUN510461126/2022	EPI_ISL_13696552
2022-05-26	BA.2.2	hCoV-19/Hong Kong/HK-HKPU-PUN685415743/2022	EPI_ISL_13696553
2022-05-26	BA.2.2	hCoV-19/Hong Kong/HK-HKPU-PUN512049737/2022	EPI_ISL_13697335
2022-05-27	BA.2.2	hCoV-19/Hong Kong/HK-HKPU-PUN512053025/2022	EPI_ISL_14226855
2022-05-27	BA.2.2	hCoV-19/Hong Kong/HK-HKPU-PUN513430841/2022	EPI_ISL_14226856
2022-05-27	BA.2.2	hCoV-19/Hong Kong/HK-HKPU-PU22MB334935/2022	EPI_ISL_14226879
2022-05-28	BA.2.2	hCoV-19/Hong Kong/HK-HKPU-PU22MC719230/2022	EPI_ISL_14214996
2022-05-28	BA.2.2	hCoV-19/Hong Kong/HK-HKPU-PU22MC719336/2022	EPI_ISL_14214997
2022-05-28	BA.2.2	hCoV-19/Hong Kong/HK-HKPU-PU22MC719460/2022	EPI_ISL_14214999
2022-05-28	BA.2.2	hCoV-19/Hong Kong/HK-HKPU-PUN384611543/2022	EPI_ISL_14226857
2022-05-28	BA.2.2	hCoV-19/Hong Kong/HK-HKPU-PUN512105335/2022	EPI_ISL_14226858
2022-05-28	BA.2	hCoV-19/Hong Kong/HK-HKPU-PU22MC867956/2022	EPI_ISL_14226880
2022-05-28	BA.2.2	hCoV-19/Hong Kong/HK-HKPU-PU22MC867983/2022	EPI_ISL_14226881
2022-05-28	BA.2.2	hCoV-19/Hong Kong/HK-HKPU-PU22MC867984/2022	EPI_ISL_14226882
2022-05-29	BA.2.12.1	hCoV-19/Hong Kong/HK-HKPU-PU22MC868123/2022	EPI_ISL_14214998
2022-05-29	BA.2.2	hCoV-19/Hong Kong/HK-HKPU-PU22MC719637/2022	EPI_ISL_14215000
2022-05-29	BA.2.2	hCoV-19/Hong Kong/HK-HKPU-PUN514312230/2022	EPI_ISL_14226859
2022-05-29	BA.2.2	hCoV-19/Hong Kong/HK-HKPU-PUN514841462/2022	EPI_ISL_14226860
2022-05-29	BA.2.2	hCoV-19/Hong Kong/HK-HKPU-PUN520744139/2022	EPI_ISL_14226861
2022-05-29	BA.2.2	hCoV-19/Hong Kong/HK-HKPU-PUN520744732/2022	EPI_ISL_14226862
2022-05-30	BA.2.2	hCoV-19/Hong Kong/HK-HKPU-PUN512441599/2022	EPI_ISL_13696509
2022-05-30	BA.2.2	hCoV-19/Hong Kong/HK-HKPU-PUN521327442/2022	EPI_ISL_13696510
2022-05-30	BA.2.2	hCoV-19/Hong Kong/HK-HKPU-PUN38497770A/2022	EPI_ISL_13696511
2022-05-30	BA.2.2	hCoV-19/Hong Kong/HK-HKPU-PUN522444744/2022	EPI_ISL_13696512
2022-05-30	BA.5.2.1	hCoV-19/Hong Kong/HK-HKPU-TM324826/2022	EPI_ISL_17581120
2022-05-30	BA.2.12.1	hCoV-19/Hong Kong/HK-HKPU-PU22MC868253/2022	EPI_ISL_14214981
2022-05-30	BA.2.2	hCoV-19/Hong Kong/HK-HKPU-PU22MC868173/2022	EPI_ISL_14215001
2022-05-30	BA.2.2	hCoV-19/Hong Kong/HK-HKPU-PU22MC868227/2022	EPI_ISL_14226883
2022-05-31	BA.2.2	hCoV-19/Hong Kong/HK-HKPU-PUN522441435/2022	EPI_ISL_13696513
2022-05-31	BA.2.2	hCoV-19/Hong Kong/HK-HKPU-PUN384970055/2022	EPI_ISL_13696514
2022-05-31	BA.2.2	hCoV-19/Hong Kong/HK-HKPU-PUN514393613/2022	EPI_ISL_13696515
2022-05-31	BA.2.2	hCoV-19/Hong Kong/HK-HKPU-PUN510900359/2022	EPI_ISL_13696516
2022-05-31	BA.2.2	hCoV-19/Hong Kong/HK-HKPU-PU22MB336184/2022	EPI_ISL_14214982
2022-05-31	BA.2.2	hCoV-19/Hong Kong/HK-HKPU-PU22MB336311/2022	EPI_ISL_14214984
2022-05-31	BA.2.2	hCoV-19/Hong Kong/HK-HKPU-PU22MB336051/2022	EPI_ISL_14215002
2022-06-01	BA.2.2	hCoV-19/Hong Kong/HK-HKPU-PUN520423928/2022	EPI_ISL_13696517
2022-06-01	BA.2.2	hCoV-19/Hong Kong/HK-HKPU-PUN514182426/2022	EPI_ISL_13696518
2022-06-01	BA.2.2	hCoV-19/Hong Kong/HK-HKPU-PUN515768378/2022	EPI_ISL_13696519
2022-06-01	BA.2.2	hCoV-19/Hong Kong/HK-HKPU-PUN51576982A/2022	EPI_ISL_13696520
2022-06-01	BA.2.2	hCoV-19/Hong Kong/HK-HKPU-PUN685409166/2022	EPI_ISL_13696521
2022-06-01	BA.2.2	hCoV-19/Hong Kong/HK-HKPU-PUN516397128/2022	EPI_ISL_13696522
2022-06-01	BA.2.2	hCoV-19/Hong Kong/HK-HKPU-PUN519113066/2022	EPI_ISL_13696523
2022-06-01	BA.2.2	hCoV-19/Hong Kong/HK-HKPU-PU22MC720570/2022	EPI_ISL_14214983
2022-06-01	BA.2.2	hCoV-19/Hong Kong/HK-HKPU-PU22MC720795/2022	EPI_ISL_14214985
2022-06-02	BA.2.2	hCoV-19/Hong Kong/HK-HKPU-PUN516394501/2022	EPI_ISL_13696524
2022-06-02	BA.2.2	hCoV-19/Hong Kong/HK-HKPU-PUN515280146/2022	EPI_ISL_13696525
2022-06-02	BA.2.2	hCoV-19/Hong Kong/HK-HKPU-PUN685404954/2022	EPI_ISL_13696526
2022-06-02	BA.2.2	hCoV-19/Hong Kong/HK-HKPU-PU22MC868507/2022	EPI_ISL_14214988
2022-06-02	BA.2.2	hCoV-19/Hong Kong/HK-HKPU-PU22MC868506/2022	EPI_ISL_14214989
2022-06-02	BA.2.2	hCoV-19/Hong Kong/HK-HKPU-PU22MC868505/2022	EPI_ISL_14214990
2022-06-03	BA.2.2	hCoV-19/Hong Kong/HK-HKPU-PUN510062205/2022	EPI_ISL_13696527
2022-06-03	BA.2.12.1	hCoV-19/Hong Kong/HK-HKPU-PUN385165075/2022	EPI_ISL_13696528
2022-06-03	BA.2.2	hCoV-19/Hong Kong/HK-HKPU-PU22MC868547/2022	EPI_ISL_14214986
2022-06-03	BA.5.2.1	hCoV-19/Hong Kong/HK-HKPU-PU22MC868546/2022	EPI_ISL_14214987
2022-06-03	BA.2.2	hCoV-19/Hong Kong/HK-HKPU-PU22MB336806/2022	EPI_ISL_14214991
2022-06-03	BA.2.2	hCoV-19/Hong Kong/HK-HKPU-PU22MB336959/2022	EPI_ISL_14214992
2022-06-04	BA.2.2	hCoV-19/Hong Kong/HK-HKPU-PUN515765034/2022	EPI_ISL_13696529
2022-06-04	BA.2.2	hCoV-19/Hong Kong/HK-HKPU-PUN514611653/2022	EPI_ISL_13696530
2022-06-04	BA.2.2	hCoV-19/Hong Kong/HK-HKPU-PUN514455570/2022	EPI_ISL_13696531
2022-06-04	BA.2.2	hCoV-19/Hong Kong/HK-HKPU-PUN384335066/2022	EPI_ISL_13696532
2022-06-04	BA.2.2	hCoV-19/Hong Kong/HK-HKPU-PUN513797982/2022	EPI_ISL_13696533
2022-06-04	BA.2.2	hCoV-19/Hong Kong/HK-HKPU-PUN384661400/2022	EPI_ISL_13696534
2022-06-04	BA.2.2	hCoV-19/Hong Kong/HK-HKPU-PUN511444519/2022	EPI_ISL_13696535
2022-06-04	BA.2.12.1	hCoV-19/Hong Kong/HK-HKPU-MC868663/2022	EPI_ISL_17581768
2022-06-04	BA.2.2	hCoV-19/Hong Kong/HK-HKPU-MC868667/2022	EPI_ISL_17581769
2022-06-04	BA.2.2	hCoV-19/Hong Kong/HK-HKPU-PU22MB337086/2022	EPI_ISL_14214993
2022-06-04	BA.2.2	hCoV-19/Hong Kong/HK-HKPU-PU22MC868649/2022	EPI_ISL_14214994
2022-06-04	BA.2.2	hCoV-19/Hong Kong/HK-HKPU-PU22MC868662/2022	EPI_ISL_14214995
2022-06-05	BA.2.2	hCoV-19/Hong Kong/HK-HKPU-PUN514926603/2022	EPI_ISL_13696536
2022-06-05	BA.2.2	hCoV-19/Hong Kong/HK-HKPU-PUN514575541/2022	EPI_ISL_13696537
2022-06-05	BA.2.2	hCoV-19/Hong Kong/HK-HKPU-PUN384334302/2022	EPI_ISL_13696538
2022-06-05	BA.2.2	hCoV-19/Hong Kong/HK-HKPU-PUN384661168/2022	EPI_ISL_13696539
2022-06-05	BA.2.2	hCoV-19/Hong Kong/HK-HKPU-PUN514928177/2022	EPI_ISL_13696540
2022-06-05	BA.2.2	hCoV-19/Hong Kong/HK-HKPU-PUN515276092/2022	EPI_ISL_13696541
2022-06-05	BA.2.2	hCoV-19/Hong Kong/HK-HKPU-PUN51527684A/2022	EPI_ISL_13696542
2022-06-05	BA.2.2	hCoV-19/Hong Kong/HK-HKPU-PUN51243150A/2022	EPI_ISL_13696543
2022-06-05	BA.2.2	hCoV-19/Hong Kong/HK-HKPU-PUN505820784/2022	EPI_ISL_13696544
2022-06-05	BA.2.2	hCoV-19/Hong Kong/HK-HKPU-PUN684520160/2022	EPI_ISL_13696545
2022-06-05	BA.2.2	hCoV-19/Hong Kong/HK-HKPU-PUN511865123/2022	EPI_ISL_13696546
2022-06-05	BA.2.2	hCoV-19/Hong Kong/HK-HKPU-MB337338/2022	EPI_ISL_17581741
2022-06-05	BA.2.2	hCoV-19/Hong Kong/HK-HKPU-MB337462/2022	EPI_ISL_17581770
2022-06-05	BA.2.2	hCoV-19/Hong Kong/HK-HKPU-MC868738/2022	EPI_ISL_17581772
2022-06-06	BA.2.2	hCoV-19/Hong Kong/HK-HKPU-MB337526/2022	EPI_ISL_17581771
2022-06-06	BA.2.2	hCoV-19/Hong Kong/HK-HKPU-MC868785/2022	EPI_ISL_17581169
2022-06-06	BA.2.2	hCoV-19/Hong Kong/HK-HKPU-MB337926/2022	EPI_ISL_17581261
2022-06-06	BA.2.2	hCoV-19/Hong Kong/HK-HKPU-PUN684640328/2022	EPI_ISL_14215065
2022-06-06	BA.2.12.1	hCoV-19/Hong Kong/HK-HKPU-PUN384323955/2022	EPI_ISL_14215066
2022-06-06	BA.2.2	hCoV-19/Hong Kong/HK-HKPU-PUN516381167/2022	EPI_ISL_14215067
2022-06-06	BA.2.2	hCoV-19/Hong Kong/HK-HKPU-PUN51037262A/2022	EPI_ISL_14215068
2022-06-06	BA.2.2	hCoV-19/Hong Kong/HK-HKPU-PUN516008598/2022	EPI_ISL_14215069
2022-06-06	BA.2.2	hCoV-19/Hong Kong/HK-HKPU-PUN521774112/2022	EPI_ISL_14215070
2022-06-06	BA.2.2	hCoV-19/Hong Kong/HK-HKPU-PUN521775631/2022	EPI_ISL_14215071
2022-06-06	BA.2.2	hCoV-19/Hong Kong/HK-HKPU-PUN517855774/2022	EPI_ISL_14215072
2022-06-07	BA.2.2	hCoV-19/Hong Kong/HK-HKPU-MC868859/2022	EPI_ISL_17581773
2022-06-07	BA.2.2	hCoV-19/Hong Kong/HK-HKPU-MC868870/2022	EPI_ISL_17581774
2022-06-07	BA.2.2	hCoV-19/Hong Kong/HK-HKPU-MC722329/2022	EPI_ISL_17581775
2022-06-07	BA.2.2	hCoV-19/Hong Kong/HK-HKPU-MC722515/2022	EPI_ISL_17581776
2022-06-07	BA.2.2	hCoV-19/Hong Kong/HK-HKPU-MB337945/2022	EPI_ISL_17581777
2022-06-07	BA.2.2	hCoV-19/Hong Kong/HK-HKPU-MB337951/2022	EPI_ISL_17581778
2022-06-07	BA.2.2	hCoV-19/Hong Kong/HK-HKPU-MB337952/2022	EPI_ISL_17581779
2022-06-07	BA.2.2	hCoV-19/Hong Kong/HK-HKPU-MC868934/2022	EPI_ISL_17581780
2022-06-07	BA.2.2	hCoV-19/Hong Kong/HK-HKPU-MC868941/2022	EPI_ISL_17581781
2022-06-07	BA.2.2	hCoV-19/Hong Kong/HK-HKPU-PUN517858382/2022	EPI_ISL_14215073
2022-06-07	BA.2.2	hCoV-19/Hong Kong/HK-HKPU-PUN510572645/2022	EPI_ISL_14215074
2022-06-07	BA.2.2	hCoV-19/Hong Kong/HK-HKPU-PUN51638221A/2022	EPI_ISL_14215075
2022-06-07	BA.2.2	hCoV-19/Hong Kong/HK-HKPU-PUN513416482/2022	EPI_ISL_14215076
2022-06-07	BA.2.2	hCoV-19/Hong Kong/HK-HKPU-PUN514993599/2022	EPI_ISL_14215077
2022-06-07	BA.2.2	hCoV-19/Hong Kong/HK-HKPU-PUN521958353/2022	EPI_ISL_14215078
2022-06-07	BA.2.2	hCoV-19/Hong Kong/HK-HKPU-PUN384898478/2022	EPI_ISL_14215079
2022-06-07	BA.2.2	hCoV-19/Hong Kong/HK-HKPU-PUN383760944/2022	EPI_ISL_14215080
2022-06-08	BA.2.2	hCoV-19/Hong Kong/HK-HKPU-MB338091/2022	EPI_ISL_17581744
2022-06-08	BA.2.2	hCoV-19/Hong Kong/HK-HKPU-MB338112/2022	EPI_ISL_17581745
2022-06-08	BA.2.2	hCoV-19/Hong Kong/HK-HKPU-MB338002/2022	EPI_ISL_17581782
2022-06-08	BA.2.2	hCoV-19/Hong Kong/HK-HKPU-MB338069/2022	EPI_ISL_17581783
2022-06-08	BA.2.2	hCoV-19/Hong Kong/HK-HKPU-PUN383339637/2022	EPI_ISL_14215081
2022-06-08	BA.2.2	hCoV-19/Hong Kong/HK-HKPU-PUN684523151/2022	EPI_ISL_14215082
2022-06-08	BA.2.2	hCoV-19/Hong Kong/HK-HKPU-PUN52256104A/2022	EPI_ISL_14215083
2022-06-08	BA.2.2	hCoV-19/Hong Kong/HK-HKPU-PUN384160622/2022	EPI_ISL_14215084
2022-06-08	BA.2.2	hCoV-19/Hong Kong/HK-HKPU-PUN384160290/2022	EPI_ISL_14215085
2022-06-08	BA.2.2	hCoV-19/Hong Kong/HK-HKPU-PUN383761460/2022	EPI_ISL_14215086
2022-06-08	BA.2.2	hCoV-19/Hong Kong/HK-HKPU-PUN685202928/2022	EPI_ISL_14215087
2022-06-08	BA.2.2	hCoV-19/Hong Kong/HK-HKPU-PUN685073362/2022	EPI_ISL_14215088
2022-06-08	BA.2.2	hCoV-19/Hong Kong/HK-HKPU-PUN684522910/2022	EPI_ISL_14215089
2022-06-08	BA.2.2	hCoV-19/Hong Kong/HK-HKPU-PUN685161679/2022	EPI_ISL_14215090
2022-06-08	BA.2.2	hCoV-19/Hong Kong/HK-HKPU-PUN511776619/2022	EPI_ISL_14215091
2022-06-08	BA.2.2	hCoV-19/Hong Kong/HK-HKPU-PUN514214875/2022	EPI_ISL_14215092
2022-06-09	BA.2.2	hCoV-19/Hong Kong/HK-HKPU-MC869039/2022	EPI_ISL_17581742
2022-06-09	BA.5.2.1	hCoV-19/Hong Kong/HK-HKPU-MB338381/2022	EPI_ISL_17581285
2022-06-09	BA.2.2	hCoV-19/Hong Kong/HK-HKPU-MC723299/2022	EPI_ISL_17581746
2022-06-09	BA.2.2	hCoV-19/Hong Kong/HK-HKPU-MB338493/2022	EPI_ISL_17581747
2022-06-09	BA.2.2	hCoV-19/Hong Kong/HK-HKPU-MC723464/2022	EPI_ISL_17581748
2022-06-09	BA.2.2	hCoV-19/Hong Kong/HK-HKPU-MC723474/2022	EPI_ISL_17581749
2022-06-09	BA.2.2	hCoV-19/Hong Kong/HK-HKPU-MC869076/2022	EPI_ISL_17581751
2022-06-09	BA.2.2	hCoV-19/Hong Kong/HK-HKPU-MC869098/2022	EPI_ISL_17581752
2022-06-09	BA.2.2	hCoV-19/Hong Kong/HK-HKPU-MC869106/2022	EPI_ISL_17581753
2022-06-09	BA.2.2	hCoV-19/Hong Kong/HK-HKPU-PUN517293636/2022	EPI_ISL_14215093
2022-06-09	BA.2.2	hCoV-19/Hong Kong/HK-HKPU-PUN512675565/2022	EPI_ISL_14215094
2022-06-09	BA.2.2	hCoV-19/Hong Kong/HK-HKPU-PUN512231705/2022	EPI_ISL_14215095
2022-06-09	BA.2.12.1	hCoV-19/Hong Kong/HK-HKPU-PUN512231454/2022	EPI_ISL_14215096
2022-06-09	BA.2.2	hCoV-19/Hong Kong/HK-HKPU-PUN51689783A/2022	EPI_ISL_14215097
2022-06-09	BA.2.2	hCoV-19/Hong Kong/HK-HKPU-PUN51467258A/2022	EPI_ISL_14215098
2022-06-09	BA.2.2	hCoV-19/Hong Kong/HK-HKPU-PUN510364732/2022	EPI_ISL_14215099
2022-06-09	BA.2.2	hCoV-19/Hong Kong/HK-HKPU-PUN51032076A/2022	EPI_ISL_14215100
2022-06-09	BA.2.2	hCoV-19/Hong Kong/HK-HKPU-PUN516101601/2022	EPI_ISL_14215101
2022-06-09	BA.2.2	hCoV-19/Hong Kong/HK-HKPU-PUN515296727/2022	EPI_ISL_14215102
2022-06-09	BA.2.2	hCoV-19/Hong Kong/HK-HKPU-PUN516824093/2022	EPI_ISL_14215103
2022-06-09	BA.2.2	hCoV-19/Hong Kong/HK-HKPU-PUN51344415A/2022	EPI_ISL_14215104
2022-06-09	BA.2.2	hCoV-19/Hong Kong/HK-HKPU-PUN384132114/2022	EPI_ISL_14215105
2022-06-09	BA.2.2	hCoV-19/Hong Kong/HK-HKPU-PUN38509058A/2022	EPI_ISL_14215106
2022-06-09	BA.2.12.1	hCoV-19/Hong Kong/HK-HKPU-PUN685161970/2022	EPI_ISL_14215107
2022-06-09	BA.2.2	hCoV-19/Hong Kong/HK-HKPU-PUN51036712A/2022	EPI_ISL_14215108
2022-06-09	BA.2.2	hCoV-19/Hong Kong/HK-HKPU-PUN515281118/2022	EPI_ISL_14215109
2022-06-09	BA.2.2	hCoV-19/Hong Kong/HK-HKPU-PUN685404512/2022	EPI_ISL_14215110
2022-06-09	BA.2.2	hCoV-19/Hong Kong/HK-HKPU-PUN516172266/2022	EPI_ISL_14215111
2022-06-10	BA.2.2	hCoV-19/Hong Kong/HK-HKPU-MC869133/2022	EPI_ISL_17581750
2022-06-10	BA.2.2	hCoV-19/Hong Kong/HK-HKPU-MC723681/2022	EPI_ISL_17581754
2022-06-10	BA.5.2	hCoV-19/Hong Kong/HK-HKPU-MC869183/2022	EPI_ISL_17581286
2022-06-10	BA.2.2	hCoV-19/Hong Kong/HK-HKPU-MC869177/2022	EPI_ISL_17581755
2022-06-10	BA.2.2	hCoV-19/Hong Kong/HK-HKPU-PUN683942983/2022	EPI_ISL_14215112
2022-06-10	BA.2.2	hCoV-19/Hong Kong/HK-HKPU-PUN505189413/2022	EPI_ISL_14215113
2022-06-10	BA.2.2	hCoV-19/Hong Kong/HK-HKPU-PUN510414055/2022	EPI_ISL_14215114
2022-06-10	BA.2.2	hCoV-19/Hong Kong/HK-HKPU-PUN51041599A/2022	EPI_ISL_14215115
2022-06-10	BA.2.2	hCoV-19/Hong Kong/HK-HKPU-PUN510414101/2022	EPI_ISL_14215116
2022-06-10	BA.2.2	hCoV-19/Hong Kong/HK-HKPU-PUN517144525/2022	EPI_ISL_14215117
2022-06-10	BA.2.2	hCoV-19/Hong Kong/HK-HKPU-PUN510711416/2022	EPI_ISL_14215118
2022-06-10	BA.2.2	hCoV-19/Hong Kong/HK-HKPU-PUN521456986/2022	EPI_ISL_14215119
2022-06-10	BA.2.2	hCoV-19/Hong Kong/HK-HKPU-PUN514669147/2022	EPI_ISL_14215120
2022-06-10	BA.2.2	hCoV-19/Hong Kong/HK-HKPU-PUN511630347/2022	EPI_ISL_14215121
2022-06-10	BA.5.2.1	hCoV-19/Hong Kong/HK-HKPU-PUN516108924/2022	EPI_ISL_14215122
2022-06-10	BA.2.2	hCoV-19/Hong Kong/HK-HKPU-PUN520451980/2022	EPI_ISL_14215123
2022-06-10	BA.2.2	hCoV-19/Hong Kong/HK-HKPU-PUN51610564A/2022	EPI_ISL_14215124
2022-06-10	BA.2.2	hCoV-19/Hong Kong/HK-HKPU-PUN38413950A/2022	EPI_ISL_14215125
2022-06-10	BA.5.2.1	hCoV-19/Hong Kong/HK-HKPU-PUN384015290/2022	EPI_ISL_14215126
2022-06-10	BA.2.2	hCoV-19/Hong Kong/HK-HKPU-PUN685168185/2022	EPI_ISL_14215127
2022-06-10	BA.2.2	hCoV-19/Hong Kong/HK-HKPU-PUN511449901/2022	EPI_ISL_14215128
2022-06-11	BA.2.2	hCoV-19/Hong Kong/HK-HKPU-MC869233/2022	EPI_ISL_17581756
2022-06-11	BA.2.2	hCoV-19/Hong Kong/HK-HKPU-MB338834/2022	EPI_ISL_17581757
2022-06-11	BA.2.2	hCoV-19/Hong Kong/HK-HKPU-MC723917/2022	EPI_ISL_17581758
2022-06-11	BA.2.12.1	hCoV-19/Hong Kong/HK-HKPU-MB338945/2022	EPI_ISL_17581759
2022-06-11	BA.2.12.1	hCoV-19/Hong Kong/HK-HKPU-MB338967/2022	EPI_ISL_17581760
2022-06-11	BA.2.2	hCoV-19/Hong Kong/HK-HKPU-PUN685049623/2022	EPI_ISL_14215129
2022-06-11	BA.2.2	hCoV-19/Hong Kong/HK-HKPU-PUN512679234/2022	EPI_ISL_14215130
2022-06-11	BA.2.2	hCoV-19/Hong Kong/HK-HKPU-PUN384013131/2022	EPI_ISL_14215131
2022-06-11	BA.2.2	hCoV-19/Hong Kong/HK-HKPU-PUN51787874A/2022	EPI_ISL_14215132
2022-06-11	BA.2.2	hCoV-19/Hong Kong/HK-HKPU-PUN517877697/2022	EPI_ISL_14215133
2022-06-11	BA.2.2	hCoV-19/Hong Kong/HK-HKPU-PUN517879452/2022	EPI_ISL_14215134
2022-06-11	BA.2.2	hCoV-19/Hong Kong/HK-HKPU-PUN516890169/2022	EPI_ISL_14215135
2022-06-11	BA.2.2	hCoV-19/Hong Kong/HK-HKPU-PUN515260323/2022	EPI_ISL_14215136
2022-06-11	BA.2.2	hCoV-19/Hong Kong/HK-HKPU-PUN684544930/2022	EPI_ISL_14215137
2022-06-11	BA.2.2	hCoV-19/Hong Kong/HK-HKPU-PUN685150553/2022	EPI_ISL_14215138
2022-06-11	BA.2.2	hCoV-19/Hong Kong/HK-HKPU-PUN516896760/2022	EPI_ISL_14215139
2022-06-12	BA.2.3	hCoV-19/Hong Kong/HK-HKPU-MC869327/2022	EPI_ISL_17581761
2022-06-12	BA.2.2	hCoV-19/Hong Kong/HK-HKPU-MC869326/2022	EPI_ISL_17581287
2022-06-12	BA.5.2.1	hCoV-19/Hong Kong/HK-HKPU-MC869332/2022	EPI_ISL_17581288
2022-06-12	BA.2.2	hCoV-19/Hong Kong/HK-HKPU-MB339044/2022	EPI_ISL_17581762
2022-06-12	BA.2.2	hCoV-19/Hong Kong/HK-HKPU-MB339070/2022	EPI_ISL_17581763
2022-06-12	BA.2.2	hCoV-19/Hong Kong/HK-HKPU-MC869401/2022	EPI_ISL_17581765
2022-06-12	BA.2.2	hCoV-19/Hong Kong/HK-HKPU-MC869406/2022	EPI_ISL_17581766
2022-06-12	BA.2.12.1	hCoV-19/Hong Kong/HK-HKPU-MC869425/2022	EPI_ISL_17581767
2022-06-12	BA.2.2	hCoV-19/Hong Kong/HK-HKPU-MC869423/2022	EPI_ISL_17581784
2022-06-12	BA.2.2	hCoV-19/Hong Kong/HK-HKPU-MC724433/2022	EPI_ISL_17581785
2022-06-12	BA.2.2	hCoV-19/Hong Kong/HK-HKPU-PUN517873225/2022	EPI_ISL_14215140
2022-06-12	BA.2.2	hCoV-19/Hong Kong/HK-HKPU-PUN683568445/2022	EPI_ISL_14215141
2022-06-12	BA.2.2	hCoV-19/Hong Kong/HK-HKPU-PUN683558105/2022	EPI_ISL_14215142
2022-06-12	BA.2.2	hCoV-19/Hong Kong/HK-HKPU-PUN510713532/2022	EPI_ISL_14215143
2022-06-12	BA.2.2	hCoV-19/Hong Kong/HK-HKPU-PUN516798114/2022	EPI_ISL_14215144
2022-06-12	BA.2.2	hCoV-19/Hong Kong/HK-HKPU-PUN516798130/2022	EPI_ISL_14215145
2022-06-12	BA.2.2	hCoV-19/Hong Kong/HK-HKPU-PUN517872601/2022	EPI_ISL_14215146
2022-06-12	BA.2.2	hCoV-19/Hong Kong/HK-HKPU-PUN516910445/2022	EPI_ISL_14215147
2022-06-12	BA.2.2	hCoV-19/Hong Kong/HK-HKPU-PUN384017943/2022	EPI_ISL_14215148
2022-06-12	BA.2.2	hCoV-19/Hong Kong/HK-HKPU-PUN384187415/2022	EPI_ISL_14215149
2022-06-12	BA.2.2	hCoV-19/Hong Kong/HK-HKPU-PUN516799935/2022	EPI_ISL_14215150
2022-06-12	BA.2.2	hCoV-19/Hong Kong/HK-HKPU-PUN515244719/2022	EPI_ISL_14215151
2022-06-12	BA.2.2	hCoV-19/Hong Kong/HK-HKPU-PUN384171756/2022	EPI_ISL_14215161
2022-06-12	BA.2.2	hCoV-19/Hong Kong/HK-HKPU-PUN38372266A/2022	EPI_ISL_14215162
2022-06-12	BA.2.2	hCoV-19/Hong Kong/HK-HKPU-PUN383729958/2022	EPI_ISL_14215163
2022-06-12	BA.5.2.1	hCoV-19/Hong Kong/HK-HKPU-PUN385092345/2022	EPI_ISL_14215164
2022-06-12	BA.2.2	hCoV-19/Hong Kong/HK-HKPU-PUN685391682/2022	EPI_ISL_14215165
2022-06-12	BA.2.2	hCoV-19/Hong Kong/HK-HKPU-PUN281787398/2022	EPI_ISL_14215166
2022-06-12	BA.2.2	hCoV-19/Hong Kong/HK-HKPU-PUN281788173/2022	EPI_ISL_14215167
2022-06-13	BA.2.2	hCoV-19/Hong Kong/HK-HKPU-MC724577/2022	EPI_ISL_17581743
2022-06-13	BA.2.12.1	hCoV-19/Hong Kong/HK-HKPU-MB339344/2022	EPI_ISL_17581764
2022-06-13	BA.5.2.9	hCoV-19/Hong Kong/HK-HKPU-MB339238/2022	EPI_ISL_17581289
2022-06-13	BA.2.2	hCoV-19/Hong Kong/HK-HKPU-MB339384/2022	EPI_ISL_17581786
2022-06-13	BA.2.2	hCoV-19/Hong Kong/HK-HKPU-MC724615/2022	EPI_ISL_17581787
2022-06-13	BA.2.2	hCoV-19/Hong Kong/HK-HKPU-MC724603/2022	EPI_ISL_17581788
2022-06-13	BA.2.2	hCoV-19/Hong Kong/HK-HKPU-MB339488/2022	EPI_ISL_17581789
2022-06-13	BA.2.2	hCoV-19/Hong Kong/HK-HKPU-MC869511/2022	EPI_ISL_17581790
2022-06-13	BA.2.2	hCoV-19/Hong Kong/HK-HKPU-MC869512/2022	EPI_ISL_17581791
2022-06-13	BA.2.2	hCoV-19/Hong Kong/HK-HKPU-MC869514/2022	EPI_ISL_17581792
2022-06-13	BA.2.2	hCoV-19/Hong Kong/HK-HKPU-PUN685049739/2022	EPI_ISL_14215168
2022-06-13	BA.2.2	hCoV-19/Hong Kong/HK-HKPU-PUN516918004/2022	EPI_ISL_14215169
2022-06-13	BA.2.2	hCoV-19/Hong Kong/HK-HKPU-PUN515968954/2022	EPI_ISL_14215170
2022-06-13	BA.2.2	hCoV-19/Hong Kong/HK-HKPU-PUN516916133/2022	EPI_ISL_14215171
2022-06-13	BA.2.2	hCoV-19/Hong Kong/HK-HKPU-PUN520410249/2022	EPI_ISL_14215172
2022-06-13	BA.2.2	hCoV-19/Hong Kong/HK-HKPU-PUN515809503/2022	EPI_ISL_14215173
2022-06-13	BA.2.2	hCoV-19/Hong Kong/HK-HKPU-PUN520412314/2022	EPI_ISL_14215174
2022-06-13	BA.2.2	hCoV-19/Hong Kong/HK-HKPU-PUN517352624/2022	EPI_ISL_14215175
2022-06-13	BA.2.2	hCoV-19/Hong Kong/HK-HKPU-PUN521323706/2022	EPI_ISL_14215176
2022-06-13	BA.2.2	hCoV-19/Hong Kong/HK-HKPU-PUN514951985/2022	EPI_ISL_14215177
2022-06-13	BA.2.2	hCoV-19/Hong Kong/HK-HKPU-PUN384018133/2022	EPI_ISL_14215178
2022-06-13	BA.2.2	hCoV-19/Hong Kong/HK-HKPU-PUN685049550/2022	EPI_ISL_14215179
2022-06-13	BA.2.2	hCoV-19/Hong Kong/HK-HKPU-PUN516910984/2022	EPI_ISL_14215180
2022-06-13	BA.2.2	hCoV-19/Hong Kong/HK-HKPU-PUN515964010/2022	EPI_ISL_14215181
2022-06-13	BA.2.2	hCoV-19/Hong Kong/HK-HKPU-PUN516804270/2022	EPI_ISL_14215182
2022-06-13	BA.2.2	hCoV-19/Hong Kong/HK-HKPU-PUN517628034/2022	EPI_ISL_14215183
2022-06-13	BA.2.2	hCoV-19/Hong Kong/HK-HKPU-PUN513442262/2022	EPI_ISL_14215184
2022-06-13	BA.2.2	hCoV-19/Hong Kong/HK-HKPU-PUN510519841/2022	EPI_ISL_14215185
2022-06-13	BA.2.2	hCoV-19/Hong Kong/HK-HKPU-PUN685152653/2022	EPI_ISL_14215186
2022-06-13	BA.2.2	hCoV-19/Hong Kong/HK-HKPU-PUN683561718/2022	EPI_ISL_14215187
2022-06-13	BA.2.2	hCoV-19/Hong Kong/HK-HKPU-PUN516897473/2022	EPI_ISL_14215188
2022-06-13	BA.2.2	hCoV-19/Hong Kong/HK-HKPU-PUN515966013/2022	EPI_ISL_14215189
2022-06-14	BA.2.2	hCoV-19/Hong Kong/HK-HKPU-MC869544/2022	EPI_ISL_17581793
2022-06-14	BA.2.2	hCoV-19/Hong Kong/HK-HKPU-MC869552/2022	EPI_ISL_17581794
2022-06-14	BA.2.2	hCoV-19/Hong Kong/HK-HKPU-MC724943/2022	EPI_ISL_17581178
2022-06-14	BA.2.2	hCoV-19/Hong Kong/HK-HKPU-MB339623/2022	EPI_ISL_17581795
2022-06-14	BA.2.2	hCoV-19/Hong Kong/HK-HKPU-MC725062/2022	EPI_ISL_17581796
2022-06-14	BA.2.12.1	hCoV-19/Hong Kong/HK-HKPU-MB339701/2022	EPI_ISL_17581797
2022-06-14	BA.2.2	hCoV-19/Hong Kong/HK-HKPU-MC725152/2022	EPI_ISL_17581798
2022-06-14	BA.2.2	hCoV-19/Hong Kong/HK-HKPU-MB339753/2022	EPI_ISL_17581799
2022-06-14	BA.2.2	hCoV-19/Hong Kong/HK-HKPU-PU22MB339778/2022	EPI_ISL_14214977
2022-06-14	BA.2.2	hCoV-19/Hong Kong/HK-HKPU-PU22MB339779/2022	EPI_ISL_14214978
2022-06-14	BA.2.2	hCoV-19/Hong Kong/HK-HKPU-PU22MB339783/2022	EPI_ISL_14214979
2022-06-14	BA.2.2	hCoV-19/Hong Kong/HK-HKPU-PU22MB339782/2022	EPI_ISL_14214980
2022-06-14	BA.2.2	hCoV-19/Hong Kong/HK-HKPU-PU22TM328650/2022	EPI_ISL_14215015
2022-06-14	BA.2.2	hCoV-19/Hong Kong/HK-HKPU-PU22TM328661/2022	EPI_ISL_14215016
2022-06-14	BA.2.2	hCoV-19/Hong Kong/HK-HKPU-PU22TM328664/2022	EPI_ISL_14215017
2022-06-14	BA.2.2	hCoV-19/Hong Kong/HK-HKPU-PU22TM328684/2022	EPI_ISL_14215018
2022-06-14	BA.2.2	hCoV-19/Hong Kong/HK-HKPU-PU22TM328720/2022	EPI_ISL_14215019
2022-06-14	BA.2.2	hCoV-19/Hong Kong/HK-HKPU-PU22TM328725/2022	EPI_ISL_14215020
2022-06-14	BA.2.2	hCoV-19/Hong Kong/HK-HKPU-PU22TM328778/2022	EPI_ISL_14215021
2022-06-14	BA.2.2	hCoV-19/Hong Kong/HK-HKPU-PU22TM328781/2022	EPI_ISL_14215022
2022-06-14	BA.2.2	hCoV-19/Hong Kong/HK-HKPU-PU22TM328820/2022	EPI_ISL_14215023
2022-06-14	BA.2.2	hCoV-19/Hong Kong/HK-HKPU-PU22TM715802/2022	EPI_ISL_14215024
2022-06-14	BA.2.2	hCoV-19/Hong Kong/HK-HKPU-PU22TM715812/2022	EPI_ISL_14215025
2022-06-14	BA.2.2	hCoV-19/Hong Kong/HK-HKPU-PU22TM328909/2022	EPI_ISL_14215026
2022-06-14	BA.2.2	hCoV-19/Hong Kong/HK-HKPU-PU22TM328926/2022	EPI_ISL_14215027
2022-06-14	BA.2.2	hCoV-19/Hong Kong/HK-HKPU-PU22TM328941/2022	EPI_ISL_14215028
2022-06-14	BA.2.2	hCoV-19/Hong Kong/HK-HKPU-PU22TM328984/2022	EPI_ISL_14215029
2022-06-14	BA.2.2	hCoV-19/Hong Kong/HK-HKPU-PU22TM329011/2022	EPI_ISL_14215030
2022-06-14	BA.2.2	hCoV-19/Hong Kong/HK-HKPU-PU22TM329060/2022	EPI_ISL_14215031
2022-06-14	BA.2.2	hCoV-19/Hong Kong/HK-HKPU-PU22TM329073/2022	EPI_ISL_14215032
2022-06-14	BA.2.2	hCoV-19/Hong Kong/HK-HKPU-PU22TM329080/2022	EPI_ISL_14215033
2022-06-14	BA.2.2	hCoV-19/Hong Kong/HK-HKPU-PUN517870714/2022	EPI_ISL_14215191
2022-06-14	BA.2.2	hCoV-19/Hong Kong/HK-HKPU-PUN516912626/2022	EPI_ISL_14215192
2022-06-14	BA.2.2	hCoV-19/Hong Kong/HK-HKPU-PUN516915153/2022	EPI_ISL_14215193
2022-06-14	BA.2.2	hCoV-19/Hong Kong/HK-HKPU-PUN520613565/2022	EPI_ISL_14215194
2022-06-14	BA.2.2	hCoV-19/Hong Kong/HK-HKPU-PUN383596508/2022	EPI_ISL_14215195
2022-06-14	BA.2.2	hCoV-19/Hong Kong/HK-HKPU-PUN516911956/2022	EPI_ISL_14215196
2022-06-14	BA.2.2	hCoV-19/Hong Kong/HK-HKPU-PUN51765809A/2022	EPI_ISL_14215197
2022-06-14	BA.2.2	hCoV-19/Hong Kong/HK-HKPU-PUN516913622/2022	EPI_ISL_14215198
2022-06-14	BA.2.2	hCoV-19/Hong Kong/HK-HKPU-PUN516911700/2022	EPI_ISL_14215199
2022-06-14	BA.2.2	hCoV-19/Hong Kong/HK-HKPU-PUN516800771/2022	EPI_ISL_14215200
2022-06-14	BA.2.2	hCoV-19/Hong Kong/HK-HKPU-PUN517614041/2022	EPI_ISL_14215201
2022-06-14	BA.2.2	hCoV-19/Hong Kong/HK-HKPU-PUN511766710/2022	EPI_ISL_14215202
2022-06-14	BA.2.2	hCoV-19/Hong Kong/HK-HKPU-PUN517145270/2022	EPI_ISL_14215203
2022-06-14	BA.2.2	hCoV-19/Hong Kong/HK-HKPU-PUN517297984/2022	EPI_ISL_14215204
2022-06-14	BA.2.2	hCoV-19/Hong Kong/HK-HKPU-PUN521322580/2022	EPI_ISL_14215205
2022-06-14	BA.2.2	hCoV-19/Hong Kong/HK-HKPU-PUN515967907/2022	EPI_ISL_14215206
2022-06-14	BA.2.2	hCoV-19/Hong Kong/HK-HKPU-PUN515969802/2022	EPI_ISL_14215207
2022-06-14	BA.2.12.1	hCoV-19/Hong Kong/HK-HKPU-PUN516800739/2022	EPI_ISL_14215208
2022-06-14	BA.2.2	hCoV-19/Hong Kong/HK-HKPU-PUN504454903/2022	EPI_ISL_14215209
2022-06-14	BA.2.2	hCoV-19/Hong Kong/HK-HKPU-PUN383446018/2022	EPI_ISL_14215210
2022-06-14	BA.2.2	hCoV-19/Hong Kong/HK-HKPU-PUN384834402/2022	EPI_ISL_14215211
2022-06-14	BA.2.2	hCoV-19/Hong Kong/HK-HKPU-PUN683551178/2022	EPI_ISL_14215212
2022-06-14	BA.2.2	hCoV-19/Hong Kong/HK-HKPU-PUN517656429/2022	EPI_ISL_14215213
2022-06-14	BA.2.2	hCoV-19/Hong Kong/HK-HKPU-PU22MC869590/2022	EPI_ISL_14215249
2022-06-14	BA.2.2	hCoV-19/Hong Kong/HK-HKPU-PU22MC869615/2022	EPI_ISL_14215250
2022-06-14	BA.2.2	hCoV-19/Hong Kong/HK-HKPU-PU22MC869619/2022	EPI_ISL_14215251
2022-06-14	BA.2.2	hCoV-19/Hong Kong/HK-HKPU-PU22MC869640/2022	EPI_ISL_14215253
2022-06-15	BA.2.2	hCoV-19/Hong Kong/HK-HKPU-PU22TM329190/2022	EPI_ISL_14215034
2022-06-15	BA.2.2	hCoV-19/Hong Kong/HK-HKPU-PU22TM329226/2022	EPI_ISL_14215035
2022-06-15	BA.2.2	hCoV-19/Hong Kong/HK-HKPU-PU22TM329246/2022	EPI_ISL_14215036
2022-06-15	BA.2.2	hCoV-19/Hong Kong/HK-HKPU-PU22TM329262/2022	EPI_ISL_14215037
2022-06-15	BA.2.2	hCoV-19/Hong Kong/HK-HKPU-PU22TM329299/2022	EPI_ISL_14215038
2022-06-15	BA.2.2	hCoV-19/Hong Kong/HK-HKPU-PU22TM329300/2022	EPI_ISL_14215039
2022-06-15	BA.2.2	hCoV-19/Hong Kong/HK-HKPU-PU22TM329308/2022	EPI_ISL_14215040
2022-06-15	BA.2.2	hCoV-19/Hong Kong/HK-HKPU-PU22TM715842/2022	EPI_ISL_14215041
2022-06-15	BA.2.12.1	hCoV-19/Hong Kong/HK-HKPU-PU22TM715849/2022	EPI_ISL_14215042
2022-06-15	BA.2.2	hCoV-19/Hong Kong/HK-HKPU-PUN516911638/2022	EPI_ISL_14215214
2022-06-15	BA.2.2	hCoV-19/Hong Kong/HK-HKPU-PUN515967192/2022	EPI_ISL_14215215
2022-06-15	BA.2.2	hCoV-19/Hong Kong/HK-HKPU-PUN384838491/2022	EPI_ISL_14215216
2022-06-15	BA.2.2	hCoV-19/Hong Kong/HK-HKPU-PUN685381105/2022	EPI_ISL_14215217
2022-06-15	BA.2.2	hCoV-19/Hong Kong/HK-HKPU-PUN516913487/2022	EPI_ISL_14215218
2022-06-15	BA.2.2	hCoV-19/Hong Kong/HK-HKPU-PUN516820276/2022	EPI_ISL_14215219
2022-06-15	BA.2.2	hCoV-19/Hong Kong/HK-HKPU-PUN522226410/2022	EPI_ISL_14215220
2022-06-15	BA.2.2	hCoV-19/Hong Kong/HK-HKPU-PUN38483822A/2022	EPI_ISL_14215221
2022-06-15	BA.2.2	hCoV-19/Hong Kong/HK-HKPU-PUN683559101/2022	EPI_ISL_14215222
2022-06-15	BA.2.2	hCoV-19/Hong Kong/HK-HKPU-PUN683562048/2022	EPI_ISL_14215223
2022-06-15	BA.2.2	hCoV-19/Hong Kong/HK-HKPU-PUN510350324/2022	EPI_ISL_14215224
2022-06-15	BA.2.2	hCoV-19/Hong Kong/HK-HKPU-PUN510352602/2022	EPI_ISL_14215225
2022-06-15	BA.2.2	hCoV-19/Hong Kong/HK-HKPU-PUN510720954/2022	EPI_ISL_14215226
2022-06-15	BA.2.2	hCoV-19/Hong Kong/HK-HKPU-PUN510513746/2022	EPI_ISL_14215227
2022-06-15	BA.2.2	hCoV-19/Hong Kong/HK-HKPU-PUN68356332A/2022	EPI_ISL_14215228
2022-06-15	BA.2.2	hCoV-19/Hong Kong/HK-HKPU-PU22MB339874/2022	EPI_ISL_14215248
2022-06-15	BA.2.2	hCoV-19/Hong Kong/HK-HKPU-PU22MC869638/2022	EPI_ISL_14215252
2022-06-15	BA.2.2	hCoV-19/Hong Kong/HK-HKPU-PU22MC869667/2022	EPI_ISL_14215254
2022-06-15	BA.2.2	hCoV-19/Hong Kong/HK-HKPU-PU22MC869668/2022	EPI_ISL_14215255
2022-06-15	BA.2.2	hCoV-19/Hong Kong/HK-HKPU-PU22MB339973/2022	EPI_ISL_14215256
2022-06-15	BA.2.2	hCoV-19/Hong Kong/HK-HKPU-PU22MB340011/2022	EPI_ISL_14215257
2022-06-15	BA.2.2	hCoV-19/Hong Kong/HK-HKPU-PU22MB340036/2022	EPI_ISL_14215258
2022-06-15	BA.5.2.31	hCoV-19/Hong Kong/HK-HKPU-PU22MC869739/2022	EPI_ISL_14215262
2022-06-15	BA.2.2	hCoV-19/Hong Kong/HK-HKPU-PUN517634174/2022	EPI_ISL_14226637
2022-06-15	BA.2.2	hCoV-19/Hong Kong/HK-HKPU-PUN517635596/2022	EPI_ISL_14226638
2022-06-15	BA.2.2	hCoV-19/Hong Kong/HK-HKPU-PUN517146994/2022	EPI_ISL_14226639
2022-06-15	BA.2.2	hCoV-19/Hong Kong/HK-HKPU-PUN517144703/2022	EPI_ISL_14226640
2022-06-15	BA.2.2	hCoV-19/Hong Kong/HK-HKPU-PUN520032988/2022	EPI_ISL_14226641
2022-06-15	BA.2.2	hCoV-19/Hong Kong/HK-HKPU-PUN509829263/2022	EPI_ISL_14226642
2022-06-15	BA.2.2	hCoV-19/Hong Kong/HK-HKPU-PUN516831545/2022	EPI_ISL_14226643
2022-06-16	BA.2.2	hCoV-19/Hong Kong/HK-HKPU-PU22TM715850/2022	EPI_ISL_14215043
2022-06-16	BA.2.2	hCoV-19/Hong Kong/HK-HKPU-PU22TM715867/2022	EPI_ISL_14215044
2022-06-16	BA.5.1.1	hCoV-19/Hong Kong/HK-HKPU-PU22TM715869/2022	EPI_ISL_14215045
2022-06-16	BA.2.2	hCoV-19/Hong Kong/HK-HKPU-PU22TM329595/2022	EPI_ISL_14215046
2022-06-16	BA.2.2	hCoV-19/Hong Kong/HK-HKPU-PU22TM329616/2022	EPI_ISL_14215047
2022-06-16	BA.2.2	hCoV-19/Hong Kong/HK-HKPU-PU22TM329666/2022	EPI_ISL_14215048
2022-06-16	BA.2.2	hCoV-19/Hong Kong/HK-HKPU-PU22TM329688/2022	EPI_ISL_14215049
2022-06-16	BA.2.2	hCoV-19/Hong Kong/HK-HKPU-PU22TM329720/2022	EPI_ISL_14215234
2022-06-16	BA.2.2	hCoV-19/Hong Kong/HK-HKPU-PU22TM329731/2022	EPI_ISL_14215235
2022-06-16	BA.2.2	hCoV-19/Hong Kong/HK-HKPU-PU22TM715883/2022	EPI_ISL_14215236
2022-06-16	BA.2.2	hCoV-19/Hong Kong/HK-HKPU-PU22TM715890/2022	EPI_ISL_14215237
2022-06-16	BA.2.2	hCoV-19/Hong Kong/HK-HKPU-PU22TM715891/2022	EPI_ISL_14215238
2022-06-16	BA.2.2	hCoV-19/Hong Kong/HK-HKPU-PU22TM329768/2022	EPI_ISL_14215239
2022-06-16	BA.2.2	hCoV-19/Hong Kong/HK-HKPU-PU22TM329782/2022	EPI_ISL_14215240
2022-06-16	BA.2.2	hCoV-19/Hong Kong/HK-HKPU-PU22TM329785/2022	EPI_ISL_14215241
2022-06-16	BA.2.2	hCoV-19/Hong Kong/HK-HKPU-PU22TM329786/2022	EPI_ISL_14215242
2022-06-16	BA.2.2	hCoV-19/Hong Kong/HK-HKPU-PU22TM329788/2022	EPI_ISL_14215243
2022-06-16	BA.2.2	hCoV-19/Hong Kong/HK-HKPU-PU22TM329880/2022	EPI_ISL_14215244
2022-06-16	BA.2.2	hCoV-19/Hong Kong/HK-HKPU-PU22TM329958/2022	EPI_ISL_14215245
2022-06-16	BA.2.2	hCoV-19/Hong Kong/HK-HKPU-PU22TM330022/2022	EPI_ISL_14215246
2022-06-16	BA.2.2	hCoV-19/Hong Kong/HK-HKPU-PU22TM330043/2022	EPI_ISL_14215247
2022-06-16	BA.2.12.1	hCoV-19/Hong Kong/HK-HKPU-PU22MB340080/2022	EPI_ISL_14215259
2022-06-16	BA.2.2	hCoV-19/Hong Kong/HK-HKPU-PU22MC869753/2022	EPI_ISL_14215260
2022-06-16	BA.4.1	hCoV-19/Hong Kong/HK-HKPU-PU22MC869751/2022	EPI_ISL_14215261
2022-06-16	BA.2.2	hCoV-19/Hong Kong/HK-HKPU-PU22MB340197/2022	EPI_ISL_14215264
2022-06-16	BA.2.2	hCoV-19/Hong Kong/HK-HKPU-PU22MC725963/2022	EPI_ISL_14215265
2022-06-16	BA.2.2	hCoV-19/Hong Kong/HK-HKPU-PU22MB340336/2022	EPI_ISL_14215266
2022-06-16	BA.2.2	hCoV-19/Hong Kong/HK-HKPU-PU22MC869831/2022	EPI_ISL_14215268
2022-06-16	BA.2.2	hCoV-19/Hong Kong/HK-HKPU-PUN500894488/2022	EPI_ISL_14226644
2022-06-16	BA.2.2	hCoV-19/Hong Kong/HK-HKPU-PUN384830164/2022	EPI_ISL_14226645
2022-06-16	BA.2.2	hCoV-19/Hong Kong/HK-HKPU-PUN384814258/2022	EPI_ISL_14226646
2022-06-16	BA.2.2	hCoV-19/Hong Kong/HK-HKPU-PUN685384643/2022	EPI_ISL_14226647
2022-06-16	BA.2.2	hCoV-19/Hong Kong/HK-HKPU-PUN510356632/2022	EPI_ISL_14226648
2022-06-16	BA.2.2	hCoV-19/Hong Kong/HK-HKPU-PUN51537633A/2022	EPI_ISL_14226649
2022-06-16	BA.2.2	hCoV-19/Hong Kong/HK-HKPU-PUN513623356/2022	EPI_ISL_14226650
2022-06-16	BA.2.2	hCoV-19/Hong Kong/HK-HKPU-PUN384813375/2022	EPI_ISL_14226651
2022-06-16	BA.2.2	hCoV-19/Hong Kong/HK-HKPU-PUN383587738/2022	EPI_ISL_14226652
2022-06-16	BA.2.2	hCoV-19/Hong Kong/HK-HKPU-PUN685200976/2022	EPI_ISL_14226653
2022-06-16	BA.2.2	hCoV-19/Hong Kong/HK-HKPU-PUN515966633/2022	EPI_ISL_14226654
2022-06-16	BA.2.2	hCoV-19/Hong Kong/HK-HKPU-PUN512005551/2022	EPI_ISL_14226655
2022-06-16	BA.2.2	hCoV-19/Hong Kong/HK-HKPU-PUN512007228/2022	EPI_ISL_14226656
2022-06-16	BA.2.2	hCoV-19/Hong Kong/HK-HKPU-PUN510358740/2022	EPI_ISL_14226657
2022-06-16	BA.2.2	hCoV-19/Hong Kong/HK-HKPU-PUN510355253/2022	EPI_ISL_14226658
2022-06-16	BA.2.2	hCoV-19/Hong Kong/HK-HKPU-PUN510736060/2022	EPI_ISL_14226659
2022-06-16	BA.2.2	hCoV-19/Hong Kong/HK-HKPU-PUN383370909/2022	EPI_ISL_14226660
2022-06-16	BA.2.2	hCoV-19/Hong Kong/HK-HKPU-PUN383392295/2022	EPI_ISL_14226661
2022-06-16	BA.2.2	hCoV-19/Hong Kong/HK-HKPU-PUN383393704/2022	EPI_ISL_14226662
2022-06-16	BA.2.2	hCoV-19/Hong Kong/HK-HKPU-PUN684849618/2022	EPI_ISL_14226663
2022-06-16	BA.2.2	hCoV-19/Hong Kong/HK-HKPU-PUN684846503/2022	EPI_ISL_14226664
2022-06-16	BA.2.2	hCoV-19/Hong Kong/HK-HKPU-PUN516902981/2022	EPI_ISL_14226665
2022-06-16	BA.2.2	hCoV-19/Hong Kong/HK-HKPU-PUN516876980/2022	EPI_ISL_14226666
2022-06-17	BA.2.2	hCoV-19/Hong Kong/HK-HKPU-PU22MB340378/2022	EPI_ISL_14215267
2022-06-17	BF.1	hCoV-19/Hong Kong/HK-HKPU-PU22MC869855/2022	EPI_ISL_14215269
2022-06-17	BA.2.2	hCoV-19/Hong Kong/HK-HKPU-PU22MB340432/2022	EPI_ISL_14215270
2022-06-17	BA.2.2	hCoV-19/Hong Kong/HK-HKPU-PU22MC726421/2022	EPI_ISL_14215271
2022-06-17	BA.2.2	hCoV-19/Hong Kong/HK-HKPU-PU22MB340538/2022	EPI_ISL_14215272
2022-06-17	BA.2.2	hCoV-19/Hong Kong/HK-HKPU-PU22MC869904/2022	EPI_ISL_14215273
2022-06-17	BA.2.2	hCoV-19/Hong Kong/HK-HKPU-PU22MC869897/2022	EPI_ISL_14215276
2022-06-17	BA.2.2	hCoV-19/Hong Kong/HK-HKPU-PU22MC869906/2022	EPI_ISL_14215277
2022-06-17	BA.2.2	hCoV-19/Hong Kong/HK-HKPU-PU22MC869934/2022	EPI_ISL_14215281
2022-06-17	BA.2.2	hCoV-19/Hong Kong/HK-HKPU-PU22MC727574/2022	EPI_ISL_14215308
2022-06-17	BA.2.12.1	hCoV-19/Hong Kong/HK-HKPU-TM715897/2022	EPI_ISL_17581814
2022-06-17	BA.2.2	hCoV-19/Hong Kong/HK-HKPU-TM715898/2022	EPI_ISL_17581815
2022-06-17	BA.2.2	hCoV-19/Hong Kong/HK-HKPU-TM715900/2022	EPI_ISL_17581816
2022-06-17	BA.2.2	hCoV-19/Hong Kong/HK-HKPU-TM330203/2022	EPI_ISL_17581736
2022-06-17	BA.2.2	hCoV-19/Hong Kong/HK-HKPU-TM330204/2022	EPI_ISL_17581737
2022-06-17	BA.2.2	hCoV-19/Hong Kong/HK-HKPU-TM330214/2022	EPI_ISL_17581291
2022-06-17	BA.2.2	hCoV-19/Hong Kong/HK-HKPU-TM330242/2022	EPI_ISL_17581817
2022-06-17	BA.2.12.1	hCoV-19/Hong Kong/HK-HKPU-TM715921/2022	EPI_ISL_17581818
2022-06-17	BA.2.2	hCoV-19/Hong Kong/HK-HKPU-TM715932/2022	EPI_ISL_17581819
2022-06-17	BA.2.2	hCoV-19/Hong Kong/HK-HKPU-TM715933/2022	EPI_ISL_17581820
2022-06-17	BA.2.2	hCoV-19/Hong Kong/HK-HKPU-TM330315/2022	EPI_ISL_17581821
2022-06-17	BA.2.2	hCoV-19/Hong Kong/HK-HKPU-TM330355/2022	EPI_ISL_17581822
2022-06-17	BA.2.2	hCoV-19/Hong Kong/HK-HKPU-TM330381/2022	EPI_ISL_17581823
2022-06-17	BA.2.2	hCoV-19/Hong Kong/HK-HKPU-TM330453/2022	EPI_ISL_17581824
2022-06-17	BA.2.2	hCoV-19/Hong Kong/HK-HKPU-PUN510733746/2022	EPI_ISL_14226667
2022-06-17	BA.2.2	hCoV-19/Hong Kong/HK-HKPU-PUN512717098/2022	EPI_ISL_14226668
2022-06-17	BA.2.2	hCoV-19/Hong Kong/HK-HKPU-PUN384835077/2022	EPI_ISL_14226669
2022-06-17	BA.2.2	hCoV-19/Hong Kong/HK-HKPU-PUN383394069/2022	EPI_ISL_14226670
2022-06-17	BA.2.2	hCoV-19/Hong Kong/HK-HKPU-PUN38344600A/2022	EPI_ISL_14226671
2022-06-17	BA.2.2	hCoV-19/Hong Kong/HK-HKPU-PUN685207245/2022	EPI_ISL_14226672
2022-06-17	BA.2.2	hCoV-19/Hong Kong/HK-HKPU-PUN514834881/2022	EPI_ISL_14226673
2022-06-17	BA.2.2	hCoV-19/Hong Kong/HK-HKPU-PUN51035964A/2022	EPI_ISL_14226674
2022-06-17	BA.2.2	hCoV-19/Hong Kong/HK-HKPU-PUN520085380/2022	EPI_ISL_14226675
2022-06-17	BA.2.2	hCoV-19/Hong Kong/HK-HKPU-PUN519029146/2022	EPI_ISL_14226676
2022-06-17	BA.2.2	hCoV-19/Hong Kong/HK-HKPU-PUN383544435/2022	EPI_ISL_14226677
2022-06-17	BA.2.2	hCoV-19/Hong Kong/HK-HKPU-PUN512005268/2022	EPI_ISL_14226678
2022-06-17	BA.2.2	hCoV-19/Hong Kong/HK-HKPU-PUN50089867A/2022	EPI_ISL_14226679
2022-06-17	BA.2.2	hCoV-19/Hong Kong/HK-HKPU-PUN520689049/2022	EPI_ISL_14226680
2022-06-17	BA.2.2	hCoV-19/Hong Kong/HK-HKPU-PUN520686600/2022	EPI_ISL_14226681
2022-06-17	BA.2.2	hCoV-19/Hong Kong/HK-HKPU-PUN517619515/2022	EPI_ISL_14226683
2022-06-17	BA.2.2	hCoV-19/Hong Kong/HK-HKPU-PUN517622230/2022	EPI_ISL_14226684
2022-06-17	BA.2.2	hCoV-19/Hong Kong/HK-HKPU-PUN520032074/2022	EPI_ISL_14226685
2022-06-17	BA.2.2	hCoV-19/Hong Kong/HK-HKPU-PUN517617792/2022	EPI_ISL_14226686
2022-06-17	BA.2.2	hCoV-19/Hong Kong/HK-HKPU-PUN517603449/2022	EPI_ISL_14226687
2022-06-17	BA.2.2	hCoV-19/Hong Kong/HK-HKPU-PUN517617687/2022	EPI_ISL_14226688
2022-06-17	BA.2.2	hCoV-19/Hong Kong/HK-HKPU-PUN517615978/2022	EPI_ISL_14226689
2022-06-17	BA.2.2	hCoV-19/Hong Kong/HK-HKPU-PUN515621431/2022	EPI_ISL_14226690
2022-06-17	BA.2.2	hCoV-19/Hong Kong/HK-HKPU-PUN515057293/2022	EPI_ISL_14226691
2022-06-17	BA.2.2	hCoV-19/Hong Kong/HK-HKPU-PUN510696379/2022	EPI_ISL_14226692
2022-06-17	BA.2.2	hCoV-19/Hong Kong/HK-HKPU-PUN683544066/2022	EPI_ISL_14226693
2022-06-17	BA.2.2	hCoV-19/Hong Kong/HK-HKPU-PUN511995485/2022	EPI_ISL_14226694
2022-06-17	BA.2.2	hCoV-19/Hong Kong/HK-HKPU-PUN511995310/2022	EPI_ISL_14226695
2022-06-17	BA.2.2	hCoV-19/Hong Kong/HK-HKPU-PUN511995248/2022	EPI_ISL_14226696
2022-06-17	BA.2.2	hCoV-19/Hong Kong/HK-HKPU-PUN480626866/2022	EPI_ISL_14226697
2022-06-18	BA.2.2	hCoV-19/Hong Kong/HK-HKPU-PU22MC869980/2022	EPI_ISL_14215274
2022-06-18	BA.2.2	hCoV-19/Hong Kong/HK-HKPU-PU22MC869981/2022	EPI_ISL_14215275
2022-06-18	BA.2.2	hCoV-19/Hong Kong/HK-HKPU-PU22MC869937/2022	EPI_ISL_14215278
2022-06-18	BA.2.2	hCoV-19/Hong Kong/HK-HKPU-PU22MC869984/2022	EPI_ISL_14215280
2022-06-18	BA.2.2	hCoV-19/Hong Kong/HK-HKPU-PU22MC726510/2022	EPI_ISL_14215282
2022-06-18	BA.2.2	hCoV-19/Hong Kong/HK-HKPU-PU22MC726560/2022	EPI_ISL_14215283
2022-06-18	BA.2.2	hCoV-19/Hong Kong/HK-HKPU-PU22MC726567/2022	EPI_ISL_14215284
2022-06-18	BA.2.2	hCoV-19/Hong Kong/HK-HKPU-PU22MB340725/2022	EPI_ISL_14215285
2022-06-18	BA.2.12.1	hCoV-19/Hong Kong/HK-HKPU-PU22MB340724/2022	EPI_ISL_14215286
2022-06-18	BA.2.2	hCoV-19/Hong Kong/HK-HKPU-PU22MB340741/2022	EPI_ISL_14215287
2022-06-18	BA.2.2	hCoV-19/Hong Kong/HK-HKPU-PU22MB340770/2022	EPI_ISL_14215288
2022-06-18	BA.2.2	hCoV-19/Hong Kong/HK-HKPU-PU22MC726870/2022	EPI_ISL_14215289
2022-06-18	BA.2.2	hCoV-19/Hong Kong/HK-HKPU-PU22MC869990/2022	EPI_ISL_14215290
2022-06-18	BA.2.2	hCoV-19/Hong Kong/HK-HKPU-PU22MC869994/2022	EPI_ISL_14215291
2022-06-18	BA.2.2	hCoV-19/Hong Kong/HK-HKPU-PU22MC870020/2022	EPI_ISL_14215292
2022-06-18	BA.2.2	hCoV-19/Hong Kong/HK-HKPU-PU22MC870025/2022	EPI_ISL_14215293
2022-06-18	BA.2.2	hCoV-19/Hong Kong/HK-HKPU-PU22MC727068/2022	EPI_ISL_14215297
2022-06-18	BA.2.2	hCoV-19/Hong Kong/HK-HKPU-PU22MC727088/2022	EPI_ISL_14215298
2022-06-18	BA.2.2	hCoV-19/Hong Kong/HK-HKPU-TM330527/2022	EPI_ISL_17581825
2022-06-18	BA.2.2	hCoV-19/Hong Kong/HK-HKPU-PU22TM715963/2022	EPI_ISL_14226595
2022-06-18	BA.2.12.1	hCoV-19/Hong Kong/HK-HKPU-PU22TM715964/2022	EPI_ISL_14226596
2022-06-18	BA.2.2	hCoV-19/Hong Kong/HK-HKPU-PU22TM715967/2022	EPI_ISL_14226597
2022-06-18	BA.2.2	hCoV-19/Hong Kong/HK-HKPU-PUN384892909/2022	EPI_ISL_14226698
2022-06-18	BA.2.2	hCoV-19/Hong Kong/HK-HKPU-PUN685447114/2022	EPI_ISL_14226699
2022-06-18	BA.2.2	hCoV-19/Hong Kong/HK-HKPU-PUN684528811/2022	EPI_ISL_14226700
2022-06-18	BA.2.2	hCoV-19/Hong Kong/HK-HKPU-PUN68521828A/2022	EPI_ISL_14226701
2022-06-18	BA.2.2	hCoV-19/Hong Kong/HK-HKPU-PUN684706876/2022	EPI_ISL_14226702
2022-06-18	BA.2.2	hCoV-19/Hong Kong/HK-HKPU-PUN684705101/2022	EPI_ISL_14226703
2022-06-18	BA.2.2	hCoV-19/Hong Kong/HK-HKPU-PUN516879777/2022	EPI_ISL_14226704
2022-06-18	BA.2.2	hCoV-19/Hong Kong/HK-HKPU-PUN516875941/2022	EPI_ISL_14226705
2022-06-18	BA.2.2	hCoV-19/Hong Kong/HK-HKPU-PUN516902043/2022	EPI_ISL_14226706
2022-06-18	BA.2.2	hCoV-19/Hong Kong/HK-HKPU-PUN51690710A/2022	EPI_ISL_14226707
2022-06-18	BA.2.2	hCoV-19/Hong Kong/HK-HKPU-PUN51148023A/2022	EPI_ISL_14226708
2022-06-18	BA.2.2	hCoV-19/Hong Kong/HK-HKPU-PUN517628522/2022	EPI_ISL_14226709
2022-06-18	BA.2.2	hCoV-19/Hong Kong/HK-HKPU-PUN516832932/2022	EPI_ISL_14226710
2022-06-18	BA.2.2	hCoV-19/Hong Kong/HK-HKPU-PUN517143448/2022	EPI_ISL_14226711
2022-06-18	BA.2.2	hCoV-19/Hong Kong/HK-HKPU-PUN509803779/2022	EPI_ISL_14226712
2022-06-18	BA.2.2	hCoV-19/Hong Kong/HK-HKPU-PUN509804430/2022	EPI_ISL_14226713
2022-06-18	BA.2.2	hCoV-19/Hong Kong/HK-HKPU-PUN50981259A/2022	EPI_ISL_14226714
2022-06-18	BA.2.2	hCoV-19/Hong Kong/HK-HKPU-PUN384651324/2022	EPI_ISL_14226715
2022-06-18	BA.2.2	hCoV-19/Hong Kong/HK-HKPU-PUN384651375/2022	EPI_ISL_14226716
2022-06-18	BA.2.2	hCoV-19/Hong Kong/HK-HKPU-PUN683545720/2022	EPI_ISL_14226717
2022-06-18	BA.2.2	hCoV-19/Hong Kong/HK-HKPU-PUN68544364A/2022	EPI_ISL_14226718
2022-06-18	BA.2.9	hCoV-19/Hong Kong/HK-HKPU-PUN684703834/2022	EPI_ISL_14226719
2022-06-18	BA.2.2	hCoV-19/Hong Kong/HK-HKPU-PUN516907169/2022	EPI_ISL_14226720
2022-06-18	BA.2.2	hCoV-19/Hong Kong/HK-HKPU-PUN514817960/2022	EPI_ISL_14226721
2022-06-18	BA.2.2	hCoV-19/Hong Kong/HK-HKPU-PUN514818231/2022	EPI_ISL_14226722
2022-06-18	BA.2.2	hCoV-19/Hong Kong/HK-HKPU-PUN512932851/2022	EPI_ISL_14226723
2022-06-18	BA.2.2	hCoV-19/Hong Kong/HK-HKPU-PUN512932525/2022	EPI_ISL_14226724
2022-06-18	BA.2.2	hCoV-19/Hong Kong/HK-HKPU-PUN512928420/2022	EPI_ISL_14226725
2022-06-18	BA.2.2	hCoV-19/Hong Kong/HK-HKPU-PUN384960246/2022	EPI_ISL_14226726
2022-06-18	BA.2.2	hCoV-19/Hong Kong/HK-HKPU-PUN384960807/2022	EPI_ISL_14226737
2022-06-18	BA.2.2	hCoV-19/Hong Kong/HK-HKPU-PUN516907266/2022	EPI_ISL_14226738
2022-06-18	BA.2.2	hCoV-19/Hong Kong/HK-HKPU-PUN507201542/2022	EPI_ISL_14226739
2022-06-19	BA.2.2	hCoV-19/Hong Kong/HK-HKPU-PU22MC870069/2022	EPI_ISL_14215294
2022-06-19	BA.2.2	hCoV-19/Hong Kong/HK-HKPU-PU22MC870078/2022	EPI_ISL_14215295
2022-06-19	BA.2.2	hCoV-19/Hong Kong/HK-HKPU-PU22MB340938/2022	EPI_ISL_14215296
2022-06-19	BA.2.12.1	hCoV-19/Hong Kong/HK-HKPU-PU22MB340941/2022	EPI_ISL_14215299
2022-06-19	BA.2.2	hCoV-19/Hong Kong/HK-HKPU-PU22MB341050/2022	EPI_ISL_14215300
2022-06-19	BA.2.2	hCoV-19/Hong Kong/HK-HKPU-PU22MC727211/2022	EPI_ISL_14215301
2022-06-19	BA.2.2	hCoV-19/Hong Kong/HK-HKPU-PU22MC727208/2022	EPI_ISL_14215303
2022-06-19	BA.2.2	hCoV-19/Hong Kong/HK-HKPU-PU22MC870087/2022	EPI_ISL_14215305
2022-06-19	BA.2.2	hCoV-19/Hong Kong/HK-HKPU-PU22TM715969/2022	EPI_ISL_14226598
2022-06-19	BA.2.2	hCoV-19/Hong Kong/HK-HKPU-PU22TM715972/2022	EPI_ISL_14226599
2022-06-19	BA.2.2	hCoV-19/Hong Kong/HK-HKPU-PU22TM715976/2022	EPI_ISL_14226600
2022-06-19	BA.2.2	hCoV-19/Hong Kong/HK-HKPU-PUN516906723/2022	EPI_ISL_14226740
2022-06-19	BA.2.2	hCoV-19/Hong Kong/HK-HKPU-PUN516906359/2022	EPI_ISL_14226741
2022-06-19	BA.2.2	hCoV-19/Hong Kong/HK-HKPU-PUN509818547/2022	EPI_ISL_14226742
2022-06-19	BA.2.2	hCoV-19/Hong Kong/HK-HKPU-PUN509816102/2022	EPI_ISL_14226743
2022-06-19	BA.2.2	hCoV-19/Hong Kong/HK-HKPU-PUN51073372A/2022	EPI_ISL_14226744
2022-06-19	BA.2.2	hCoV-19/Hong Kong/HK-HKPU-PUN512093515/2022	EPI_ISL_14226745
2022-06-19	BA.2.2	hCoV-19/Hong Kong/HK-HKPU-PUN684587745/2022	EPI_ISL_14226746
2022-06-19	BA.2.2	hCoV-19/Hong Kong/HK-HKPU-PUN510705343/2022	EPI_ISL_14226747
2022-06-19	BA.2.2	hCoV-19/Hong Kong/HK-HKPU-PUN517831859/2022	EPI_ISL_14226748
2022-06-19	BA.2.2	hCoV-19/Hong Kong/HK-HKPU-PUN517061840/2022	EPI_ISL_14226749
2022-06-19	BA.2.2	hCoV-19/Hong Kong/HK-HKPU-PUN517831794/2022	EPI_ISL_14226750
2022-06-19	BA.2.2	hCoV-19/Hong Kong/HK-HKPU-PUN512089674/2022	EPI_ISL_14226751
2022-06-19	BA.2.2	hCoV-19/Hong Kong/HK-HKPU-PUN518871323/2022	EPI_ISL_14226752
2022-06-19	BA.2.2	hCoV-19/Hong Kong/HK-HKPU-PUN517147397/2022	EPI_ISL_14226753
2022-06-19	BA.2.2	hCoV-19/Hong Kong/HK-HKPU-PUN517622117/2022	EPI_ISL_14226754
2022-06-19	BA.2.2	hCoV-19/Hong Kong/HK-HKPU-PUN512929982/2022	EPI_ISL_14226755
2022-06-19	BA.2.2	hCoV-19/Hong Kong/HK-HKPU-PUN510348729/2022	EPI_ISL_14226756
2022-06-19	BA.2.2	hCoV-19/Hong Kong/HK-HKPU-PUN509819829/2022	EPI_ISL_14226757
2022-06-19	BA.2.2	hCoV-19/Hong Kong/HK-HKPU-PUN509819004/2022	EPI_ISL_14226758
2022-06-19	BA.2.2	hCoV-19/Hong Kong/HK-HKPU-PUN513628110/2022	EPI_ISL_14226759
2022-06-19	BA.2.2	hCoV-19/Hong Kong/HK-HKPU-PUN51362784A/2022	EPI_ISL_14226760
2022-06-19	BA.2.2	hCoV-19/Hong Kong/HK-HKPU-PUN520080036/2022	EPI_ISL_14226761
2022-06-19	BA.2.2	hCoV-19/Hong Kong/HK-HKPU-PUN68458634A/2022	EPI_ISL_14226762
2022-06-19	BA.2.2	hCoV-19/Hong Kong/HK-HKPU-PUN685447890/2022	EPI_ISL_14226763
2022-06-19	BA.2.2	hCoV-19/Hong Kong/HK-HKPU-PUN517337129/2022	EPI_ISL_14226764
2022-06-19	BA.2.2	hCoV-19/Hong Kong/HK-HKPU-PUN515161015/2022	EPI_ISL_14226765
2022-06-19	BA.2.2	hCoV-19/Hong Kong/HK-HKPU-PUN51505832A/2022	EPI_ISL_14226766
2022-06-19	BA.2.2	hCoV-19/Hong Kong/HK-HKPU-PUN511474833/2022	EPI_ISL_14226767
2022-06-19	BA.2.2	hCoV-19/Hong Kong/HK-HKPU-PUN509801598/2022	EPI_ISL_14226768
2022-06-19	BA.2.2	hCoV-19/Hong Kong/HK-HKPU-PUN281313809/2022	EPI_ISL_14226775
2022-06-20	BA.2.2	hCoV-19/Hong Kong/HK-HKPU-PU22MC727214/2022	EPI_ISL_14215302
2022-06-20	BA.2.2	hCoV-19/Hong Kong/HK-HKPU-PU22MB341109/2022	EPI_ISL_14215304
2022-06-20	BA.2.2	hCoV-19/Hong Kong/HK-HKPU-PU22MB341243/2022	EPI_ISL_14215306
2022-06-20	BA.2.2	hCoV-19/Hong Kong/HK-HKPU-PU22MC727573/2022	EPI_ISL_14215307
2022-06-20	BA.2.2	hCoV-19/Hong Kong/HK-HKPU-PU22MC727605/2022	EPI_ISL_14215309
2022-06-20	BA.2.2	hCoV-19/Hong Kong/HK-HKPU-PU22MC870199/2022	EPI_ISL_14215310
2022-06-20	BA.2.2	hCoV-19/Hong Kong/HK-HKPU-PU22MC870200/2022	EPI_ISL_14215311
2022-06-20	BA.2.2	hCoV-19/Hong Kong/HK-HKPU-PU22MC870258/2022	EPI_ISL_14215312
2022-06-20	BA.2.2	hCoV-19/Hong Kong/HK-HKPU-PU22MC727697/2022	EPI_ISL_14215317
2022-06-20	BA.2.2	hCoV-19/Hong Kong/HK-HKPU-PU22TM715999/2022	EPI_ISL_14226601
2022-06-20	BA.2.2	hCoV-19/Hong Kong/HK-HKPU-PU22TM716021/2022	EPI_ISL_14226602
2022-06-20	BA.2.2	hCoV-19/Hong Kong/HK-HKPU-PU22TM716019/2022	EPI_ISL_14226603
2022-06-20	BA.2.2	hCoV-19/Hong Kong/HK-HKPU-PU22TM716020/2022	EPI_ISL_14226604
2022-06-20	BA.2.2	hCoV-19/Hong Kong/HK-HKPU-PU22TM716026/2022	EPI_ISL_14226605
2022-06-20	BA.2.2	hCoV-19/Hong Kong/HK-HKPU-PU22TM716027/2022	EPI_ISL_14226606
2022-06-20	BA.2.2	hCoV-19/Hong Kong/HK-HKPU-PU22TM331132/2022	EPI_ISL_14226607
2022-06-20	BA.2.2	hCoV-19/Hong Kong/HK-HKPU-PU22TM331149/2022	EPI_ISL_14226608
2022-06-20	BA.2.2	hCoV-19/Hong Kong/HK-HKPU-PU22TM331160/2022	EPI_ISL_14226609
2022-06-20	BA.2.2	hCoV-19/Hong Kong/HK-HKPU-PU22TM331161/2022	EPI_ISL_14226610
2022-06-20	BA.2.2	hCoV-19/Hong Kong/HK-HKPU-PU22TM331213/2022	EPI_ISL_14226611
2022-06-20	BA.2.12.1	hCoV-19/Hong Kong/HK-HKPU-PU22TM331218/2022	EPI_ISL_14226612
2022-06-20	BA.2.2	hCoV-19/Hong Kong/HK-HKPU-PU22TM331225/2022	EPI_ISL_14226613
2022-06-20	BA.2.2	hCoV-19/Hong Kong/HK-HKPU-PU22TM331230/2022	EPI_ISL_14226614
2022-06-20	BA.2.2	hCoV-19/Hong Kong/HK-HKPU-PU22TM331231/2022	EPI_ISL_14226615
2022-06-20	BA.2.2	hCoV-19/Hong Kong/HK-HKPU-PU22TM331240/2022	EPI_ISL_14226616
2022-06-20	BA.2.2	hCoV-19/Hong Kong/HK-HKPU-PU22TM331250/2022	EPI_ISL_14226617
2022-06-20	BA.2.2	hCoV-19/Hong Kong/HK-HKPU-PU22TM331251/2022	EPI_ISL_14226618
2022-06-20	BA.2.2	hCoV-19/Hong Kong/HK-HKPU-PU22TM331264/2022	EPI_ISL_14226619
2022-06-20	BA.2.2	hCoV-19/Hong Kong/HK-HKPU-PU22TM331300/2022	EPI_ISL_14226620
2022-06-20	BA.2.2	hCoV-19/Hong Kong/HK-HKPU-PU22TM331340/2022	EPI_ISL_14226621
2022-06-20	BA.2.2	hCoV-19/Hong Kong/HK-HKPU-PUN517834866/2022	EPI_ISL_14226776
2022-06-20	BA.2.2	hCoV-19/Hong Kong/HK-HKPU-PUN517848727/2022	EPI_ISL_14226777
2022-06-20	BA.2.2	hCoV-19/Hong Kong/HK-HKPU-PUN512103022/2022	EPI_ISL_14226778
2022-06-20	BA.2.2	hCoV-19/Hong Kong/HK-HKPU-PUN520610019/2022	EPI_ISL_14226779
2022-06-20	BA.2.12.1	hCoV-19/Hong Kong/HK-HKPU-PUN384983726/2022	EPI_ISL_14226780
2022-06-20	BA.2.2	hCoV-19/Hong Kong/HK-HKPU-PUN684706752/2022	EPI_ISL_14226781
2022-06-20	BA.2.2	hCoV-19/Hong Kong/HK-HKPU-PUN684709220/2022	EPI_ISL_14226782
2022-06-20	BA.2.2	hCoV-19/Hong Kong/HK-HKPU-PUN517833363/2022	EPI_ISL_14226783
2022-06-20	BA.2.2	hCoV-19/Hong Kong/HK-HKPU-PUN511477875/2022	EPI_ISL_14226784
2022-06-20	BA.2.2	hCoV-19/Hong Kong/HK-HKPU-PUN505186201/2022	EPI_ISL_14226785
2022-06-20	BA.2.2	hCoV-19/Hong Kong/HK-HKPU-PUN510728424/2022	EPI_ISL_14226786
2022-06-20	BA.2.2	hCoV-19/Hong Kong/HK-HKPU-PUN51209533A/2022	EPI_ISL_14226787
2022-06-20	BA.2.2	hCoV-19/Hong Kong/HK-HKPU-PUN385086183/2022	EPI_ISL_14226788
2022-06-20	BA.2.12.1	hCoV-19/Hong Kong/HK-HKPU-PUN384301498/2022	EPI_ISL_14226789
2022-06-20	BA.2.2	hCoV-19/Hong Kong/HK-HKPU-PUN384302540/2022	EPI_ISL_14226790
2022-06-20	BA.2.2	hCoV-19/Hong Kong/HK-HKPU-PUN384301072/2022	EPI_ISL_14226791
2022-06-20	BA.2.2	hCoV-19/Hong Kong/HK-HKPU-PUN384300122/2022	EPI_ISL_14226792
2022-06-20	BA.2.2	hCoV-19/Hong Kong/HK-HKPU-PUN684815098/2022	EPI_ISL_14226793
2022-06-20	BA.2.2	hCoV-19/Hong Kong/HK-HKPU-PUN684705519/2022	EPI_ISL_14226794
2022-06-20	BA.2.2	hCoV-19/Hong Kong/HK-HKPU-PUN684817643/2022	EPI_ISL_14226795
2022-06-20	BA.2.2	hCoV-19/Hong Kong/HK-HKPU-PUN517337358/2022	EPI_ISL_14226796
2022-06-20	BA.2.2	hCoV-19/Hong Kong/HK-HKPU-PUN513835663/2022	EPI_ISL_14226797
2022-06-20	BA.2.2	hCoV-19/Hong Kong/HK-HKPU-PUN517631485/2022	EPI_ISL_14226798
2022-06-20	BA.2.2	hCoV-19/Hong Kong/HK-HKPU-PUN512932932/2022	EPI_ISL_14226799
2022-06-20	BA.2.2	hCoV-19/Hong Kong/HK-HKPU-PUN515384235/2022	EPI_ISL_14226800
2022-06-20	BA.2.2	hCoV-19/Hong Kong/HK-HKPU-PUN51533842A/2022	EPI_ISL_14226801
2022-06-20	BA.2.2	hCoV-19/Hong Kong/HK-HKPU-PUN510722760/2022	EPI_ISL_14226802
2022-06-20	BA.2.2	hCoV-19/Hong Kong/HK-HKPU-PUN520455927/2022	EPI_ISL_14226803
2022-06-20	BA.2.2	hCoV-19/Hong Kong/HK-HKPU-PUN684705586/2022	EPI_ISL_14226804
2022-06-20	BA.2.2	hCoV-19/Hong Kong/HK-HKPU-PUN684703982/2022	EPI_ISL_14226805
2022-06-20	BA.2.2	hCoV-19/Hong Kong/HK-HKPU-PUN684814695/2022	EPI_ISL_14226806
2022-06-20	BA.2.2	hCoV-19/Hong Kong/HK-HKPU-PUN684588709/2022	EPI_ISL_14226807
2022-06-20	BA.2.2	hCoV-19/Hong Kong/HK-HKPU-PUN51705948A/2022	EPI_ISL_14226808
2022-06-20	BA.2.2	hCoV-19/Hong Kong/HK-HKPU-PUN512006795/2022	EPI_ISL_14226809
2022-06-21	BA.2.2	hCoV-19/Hong Kong/HK-HKPU-PU22MC870294/2022	EPI_ISL_14215313
2022-06-21	BA.2.2	hCoV-19/Hong Kong/HK-HKPU-PU22MC870290/2022	EPI_ISL_14215314
2022-06-21	BA.2.2	hCoV-19/Hong Kong/HK-HKPU-PU22MC870306/2022	EPI_ISL_14215315
2022-06-21	BA.2.2	hCoV-19/Hong Kong/HK-HKPU-PU22MC727794/2022	EPI_ISL_14215316
2022-06-21	BA.2.2	hCoV-19/Hong Kong/HK-HKPU-PU22MB341476/2022	EPI_ISL_14215318
2022-06-21	BA.2.2	hCoV-19/Hong Kong/HK-HKPU-MB341576/2022	EPI_ISL_17581800
2022-06-21	BA.2.2	hCoV-19/Hong Kong/HK-HKPU-MB341589/2022	EPI_ISL_17581801
2022-06-21	BA.2.2	hCoV-19/Hong Kong/HK-HKPU-MB341466/2022	EPI_ISL_17581802
2022-06-21	BA.2.2	hCoV-19/Hong Kong/HK-HKPU-MC728012/2022	EPI_ISL_17581803
2022-06-21	BA.2.2	hCoV-19/Hong Kong/HK-HKPU-MC728045/2022	EPI_ISL_17581804
2022-06-21	BA.2.2	hCoV-19/Hong Kong/HK-HKPU-MB341643/2022	EPI_ISL_17581731
2022-06-21	BA.2.2	hCoV-19/Hong Kong/HK-HKPU-MB341646/2022	EPI_ISL_17581732
2022-06-21	BA.2.2	hCoV-19/Hong Kong/HK-HKPU-MB341642/2022	EPI_ISL_17581733
2022-06-21	BA.2.2	hCoV-19/Hong Kong/HK-HKPU-MC728122/2022	EPI_ISL_17581805
2022-06-21	BA.2.2	hCoV-19/Hong Kong/HK-HKPU-MC870352/2022	EPI_ISL_17581806
2022-06-21	BA.5.2.26	hCoV-19/Hong Kong/HK-HKPU-MC870350/2022	EPI_ISL_17581290
2022-06-21	BA.2.2	hCoV-19/Hong Kong/HK-HKPU-MC870323/2022	EPI_ISL_17581807
2022-06-21	BA.2.2	hCoV-19/Hong Kong/HK-HKPU-MC870372/2022	EPI_ISL_17581808
2022-06-21	BA.2.2	hCoV-19/Hong Kong/HK-HKPU-MC870378/2022	EPI_ISL_17581809
2022-06-21	BA.2.2	hCoV-19/Hong Kong/HK-HKPU-MC728207/2022	EPI_ISL_17581735
2022-06-21	BA.5.2.1	hCoV-19/Hong Kong/HK-HKPU-PU22TM716059/2022	EPI_ISL_14226622
2022-06-21	BA.2.2	hCoV-19/Hong Kong/HK-HKPU-PU22TM716064/2022	EPI_ISL_14226623
2022-06-21	BA.2.2	hCoV-19/Hong Kong/HK-HKPU-PU22TM716073/2022	EPI_ISL_14226624
2022-06-21	BA.2.2	hCoV-19/Hong Kong/HK-HKPU-PU22TM331516/2022	EPI_ISL_14226625
2022-06-21	BA.2.2	hCoV-19/Hong Kong/HK-HKPU-PU22TM331580/2022	EPI_ISL_14226626
2022-06-21	BA.2.2	hCoV-19/Hong Kong/HK-HKPU-PU22TM331676/2022	EPI_ISL_14226627
2022-06-21	BA.2.2	hCoV-19/Hong Kong/HK-HKPU-PU22TM331692/2022	EPI_ISL_14226628
2022-06-21	BA.2.12.1	hCoV-19/Hong Kong/HK-HKPU-PU22TM716105/2022	EPI_ISL_14226629
2022-06-21	BA.2.2	hCoV-19/Hong Kong/HK-HKPU-PU22TM331722/2022	EPI_ISL_14226630
2022-06-21	BA.2.2	hCoV-19/Hong Kong/HK-HKPU-PU22TM331737/2022	EPI_ISL_14226631
2022-06-21	BA.2.2	hCoV-19/Hong Kong/HK-HKPU-PU22TM331738/2022	EPI_ISL_14226632
2022-06-21	BA.2.2	hCoV-19/Hong Kong/HK-HKPU-PU22TM331789/2022	EPI_ISL_14226633
2022-06-21	BA.2.2	hCoV-19/Hong Kong/HK-HKPU-PU22TM331816/2022	EPI_ISL_14226634
2022-06-21	BA.2.2	hCoV-19/Hong Kong/HK-HKPU-PU22TM331824/2022	EPI_ISL_14226635
2022-06-21	BA.2.2	hCoV-19/Hong Kong/HK-HKPU-PU22TM331825/2022	EPI_ISL_14226636
2022-06-21	BA.2.2	hCoV-19/Hong Kong/HK-HKPU-PU22TM331830/2022	EPI_ISL_14226810
2022-06-21	BA.2.2	hCoV-19/Hong Kong/HK-HKPU-PU22TM331904/2022	EPI_ISL_14226811
2022-06-21	BA.2.2	hCoV-19/Hong Kong/HK-HKPU-PU22TM331913/2022	EPI_ISL_14226812
2022-06-21	BA.2.2	hCoV-19/Hong Kong/HK-HKPU-PU22TM331939/2022	EPI_ISL_14226813
2022-06-21	BA.2.2	hCoV-19/Hong Kong/HK-HKPU-PU22TM331832/2022	EPI_ISL_14226814
2022-06-21	BA.2.2	hCoV-19/Hong Kong/HK-HKPU-PUN383563189/2022	EPI_ISL_15684284
2022-06-21	BA.2.2	hCoV-19/Hong Kong/HK-HKPU-PUN38356259A/2022	EPI_ISL_15684285
2022-06-21	BA.5.2.1	hCoV-19/Hong Kong/HK-HKPU-PUN684705640/2022	EPI_ISL_15684452
2022-06-21	BA.2.2	hCoV-19/Hong Kong/HK-HKPU-PUN684817171/2022	EPI_ISL_15683583
2022-06-21	BA.2.2	hCoV-19/Hong Kong/HK-HKPU-PUN517631183/2022	EPI_ISL_15683962
2022-06-21	BA.2.2	hCoV-19/Hong Kong/HK-HKPU-PUN517649740/2022	EPI_ISL_15683952
2022-06-21	BA.2.2	hCoV-19/Hong Kong/HK-HKPU-PUN517631566/2022	EPI_ISL_15683961
2022-06-21	BA.2.2	hCoV-19/Hong Kong/HK-HKPU-PUN517631825/2022	EPI_ISL_15683960
2022-06-21	BA.2.2	hCoV-19/Hong Kong/HK-HKPU-PUN517638935/2022	EPI_ISL_15683957
2022-06-21	BA.2.2	hCoV-19/Hong Kong/HK-HKPU-PUN513313934/2022	EPI_ISL_15684112
2022-06-21	BA.2.2	hCoV-19/Hong Kong/HK-HKPU-PUN51331325A/2022	EPI_ISL_15684114
2022-06-21	BA.2.2	hCoV-19/Hong Kong/HK-HKPU-PUN510708814/2022	EPI_ISL_15684195
2022-06-21	BA.2.2	hCoV-19/Hong Kong/HK-HKPU-PUN684583197/2022	EPI_ISL_15683599
2022-06-21	BA.2.2	hCoV-19/Hong Kong/HK-HKPU-PUN684811246/2022	EPI_ISL_15683585
2022-06-21	BA.2.2	hCoV-19/Hong Kong/HK-HKPU-PUN517649228/2022	EPI_ISL_15683953
2022-06-21	BA.2.2	hCoV-19/Hong Kong/HK-HKPU-PUN517631043/2022	EPI_ISL_15683963
2022-06-21	BA.2.2	hCoV-19/Hong Kong/HK-HKPU-PUN517632120/2022	EPI_ISL_15683959
2022-06-21	BA.2.2	hCoV-19/Hong Kong/HK-HKPU-PUN517636789/2022	EPI_ISL_15683958
2022-06-21	BA.2.2	hCoV-19/Hong Kong/HK-HKPU-PUN512920330/2022	EPI_ISL_15684129
2022-06-21	BA.2.2	hCoV-19/Hong Kong/HK-HKPU-PUN515334629/2022	EPI_ISL_15684050
2022-06-21	BA.2.2	hCoV-19/Hong Kong/HK-HKPU-PUN516807490/2022	EPI_ISL_15683994
2022-06-21	BA.2.2	hCoV-19/Hong Kong/HK-HKPU-PUN513315422/2022	EPI_ISL_15684110
2022-06-21	BA.2.2	hCoV-19/Hong Kong/HK-HKPU-PUN513317255/2022	EPI_ISL_15684109
2022-06-21	BA.2.2	hCoV-19/Hong Kong/HK-HKPU-PUN513314809/2022	EPI_ISL_15684111
2022-06-21	BA.2.2	hCoV-19/Hong Kong/HK-HKPU-PUN68542792A/2022	EPI_ISL_15683552
2022-06-21	BA.2.2	hCoV-19/Hong Kong/HK-HKPU-PUN685424459/2022	EPI_ISL_15683555
2022-06-21	BA.2.2	hCoV-19/Hong Kong/HK-HKPU-PUN685426443/2022	EPI_ISL_15683553
2022-06-21	BA.5.1.4	hCoV-19/Hong Kong/HK-HKPU-PUN281310729/2022	EPI_ISL_15684525
2022-06-21	BA.5.1.4	hCoV-19/Hong Kong/HK-HKPU-PUN281310710/2022	EPI_ISL_15684463
2022-06-21	BA.5.2.1	hCoV-19/Hong Kong/HK-HKPU-PUN480622232/2022	EPI_ISL_15684460
2022-06-21	BA.2.2	hCoV-19/Hong Kong/HK-HKPU-PUN514817529/2022	EPI_ISL_15684071
2022-06-21	BA.2.2	hCoV-19/Hong Kong/HK-HKPU-PUN511618681/2022	EPI_ISL_15684157
2022-06-21	BA.2.12.1	hCoV-19/Hong Kong/HK-HKPU-PUN519302306/2022	EPI_ISL_15683842
2022-06-22	BA.2.2	hCoV-19/Hong Kong/HK-HKPU-MC870409/2022	EPI_ISL_17581734
2022-06-22	BA.2.12.1	hCoV-19/Hong Kong/HK-HKPU-MC870411/2022	EPI_ISL_17581810
2022-06-22	BA.2.2	hCoV-19/Hong Kong/HK-HKPU-MC870428/2022	EPI_ISL_17581811
2022-06-22	BA.2.2	hCoV-19/Hong Kong/HK-HKPU-MB341776/2022	EPI_ISL_17581812
2022-06-22	BA.2.2	hCoV-19/Hong Kong/HK-HKPU-MC728166/2022	EPI_ISL_17581813
2022-06-22	BA.2.2	hCoV-19/Hong Kong/HK-HKPU-PU22TM332045/2022	EPI_ISL_14226815
2022-06-22	BA.2.2	hCoV-19/Hong Kong/HK-HKPU-PU22TM332078/2022	EPI_ISL_14226816
2022-06-22	BA.2.2	hCoV-19/Hong Kong/HK-HKPU-PU22TM332142/2022	EPI_ISL_14226817
2022-06-22	BA.2.2	hCoV-19/Hong Kong/HK-HKPU-PU22TM332150/2022	EPI_ISL_14226818
2022-06-22	BA.2.2	hCoV-19/Hong Kong/HK-HKPU-PU22TM332162/2022	EPI_ISL_14226819
2022-06-22	BA.2.2	hCoV-19/Hong Kong/HK-HKPU-PU22TM332164/2022	EPI_ISL_14226820
2022-06-22	BA.2.2	hCoV-19/Hong Kong/HK-HKPU-PU22TM332178/2022	EPI_ISL_14226821
2022-06-22	BA.2.2	hCoV-19/Hong Kong/HK-HKPU-PU22TM332237/2022	EPI_ISL_14226822
2022-06-22	BA.2.2	hCoV-19/Hong Kong/HK-HKPU-PU22TM332238/2022	EPI_ISL_14226823
2022-06-22	BA.2.2	hCoV-19/Hong Kong/HK-HKPU-PU22TM716160/2022	EPI_ISL_14226824
2022-06-22	BA.2.2	hCoV-19/Hong Kong/HK-HKPU-PU22TM716165/2022	EPI_ISL_14226825
2022-06-22	BA.2.2	hCoV-19/Hong Kong/HK-HKPU-PU22TM332251/2022	EPI_ISL_14226826
2022-06-22	BA.2.2	hCoV-19/Hong Kong/HK-HKPU-PU22TM332279/2022	EPI_ISL_14226827
2022-06-22	BA.2.2	hCoV-19/Hong Kong/HK-HKPU-PU22TM332300/2022	EPI_ISL_14226828
2022-06-22	BA.2.2	hCoV-19/Hong Kong/HK-HKPU-PU22TM332304/2022	EPI_ISL_14226829
2022-06-22	BA.2.2	hCoV-19/Hong Kong/HK-HKPU-PU22TM332311/2022	EPI_ISL_14226830
2022-06-22	BA.2.2	hCoV-19/Hong Kong/HK-HKPU-PU22TM332312/2022	EPI_ISL_14226831
2022-06-22	BA.2.2	hCoV-19/Hong Kong/HK-HKPU-PU22TM332316/2022	EPI_ISL_14226832
2022-06-22	BA.2.2	hCoV-19/Hong Kong/HK-HKPU-PU22TM332319/2022	EPI_ISL_14226833
2022-06-22	BA.2.2	hCoV-19/Hong Kong/HK-HKPU-PU22TM332320/2022	EPI_ISL_14226834
2022-06-22	BA.2.2	hCoV-19/Hong Kong/HK-HKPU-PU22TM332348/2022	EPI_ISL_14226835
2022-06-22	BA.2.2	hCoV-19/Hong Kong/HK-HKPU-PU22TM332358/2022	EPI_ISL_14226836
2022-06-22	BA.2.2	hCoV-19/Hong Kong/HK-HKPU-PU22TM332359/2022	EPI_ISL_14226837
2022-06-22	BA.2.2	hCoV-19/Hong Kong/HK-HKPU-PU22TM332370/2022	EPI_ISL_14226838
2022-06-22	BA.2.2	hCoV-19/Hong Kong/HK-HKPU-PU22TM332376/2022	EPI_ISL_14226839
2022-06-22	BA.2.2	hCoV-19/Hong Kong/HK-HKPU-PU22TM332400/2022	EPI_ISL_14226840
2022-06-22	BA.2.2	hCoV-19/Hong Kong/HK-HKPU-PU22TM332482/2022	EPI_ISL_14226841
2022-06-22	BA.2.2	hCoV-19/Hong Kong/HK-HKPU-PU22MC728552/2022	EPI_ISL_14226944
2022-06-22	BA.2.2	hCoV-19/Hong Kong/HK-HKPU-PU22MB341954/2022	EPI_ISL_14226945
2022-06-22	BA.2.2	hCoV-19/Hong Kong/HK-HKPU-PU22MB341850/2022	EPI_ISL_14226946
2022-06-22	BA.2.2	hCoV-19/Hong Kong/HK-HKPU-PU22MC728654/2022	EPI_ISL_14226947
2022-06-22	BA.2.2	hCoV-19/Hong Kong/HK-HKPU-PU22MC728657/2022	EPI_ISL_14226948
2022-06-22	BA.2.2	hCoV-19/Hong Kong/HK-HKPU-PU22MC728652/2022	EPI_ISL_14226950
2022-06-22	BA.2.2	hCoV-19/Hong Kong/HK-HKPU-PU22MC870440/2022	EPI_ISL_14226957
2022-06-22	BA.2.2	hCoV-19/Hong Kong/HK-HKPU-PU22MC870465/2022	EPI_ISL_14226958
2022-06-22	BA.2.2	hCoV-19/Hong Kong/HK-HKPU-PU22MC870466/2022	EPI_ISL_14226959
2022-06-22	BA.2.2	hCoV-19/Hong Kong/HK-HKPU-PU22MC870475/2022	EPI_ISL_14226960
2022-06-22	BA.2.2	hCoV-19/Hong Kong/HK-HKPU-PU22MC870476/2022	EPI_ISL_14226961
2022-06-22	BA.2.2	hCoV-19/Hong Kong/HK-HKPU-PU22MC870477/2022	EPI_ISL_14226962
2022-06-22	BA.2.2	hCoV-19/Hong Kong/HK-HKPU-PU22MC870478/2022	EPI_ISL_14226963
2022-06-22	BA.2.2	hCoV-19/Hong Kong/HK-HKPU-PU22MC870479/2022	EPI_ISL_14226964
2022-06-22	BA.2.2	hCoV-19/Hong Kong/HK-HKPU-PU22MC870481/2022	EPI_ISL_14226965
2022-06-22	BA.2.2	hCoV-19/Hong Kong/HK-HKPU-PU22MC870515/2022	EPI_ISL_14226966
2022-06-22	BA.2.2	hCoV-19/Hong Kong/HK-HKPU-PUN517823848/2022	EPI_ISL_15683946
2022-06-22	BA.2.12.1	hCoV-19/Hong Kong/HK-HKPU-PUN38331720A/2022	EPI_ISL_15684304
2022-06-22	BA.2.2	hCoV-19/Hong Kong/HK-HKPU-PUN383714608/2022	EPI_ISL_15684279
2022-06-22	BA.2.2	hCoV-19/Hong Kong/HK-HKPU-PUN383700623/2022	EPI_ISL_15684281
2022-06-22	BA.2.2	hCoV-19/Hong Kong/HK-HKPU-PUN685424904/2022	EPI_ISL_15683554
2022-06-22	BA.2.2	hCoV-19/Hong Kong/HK-HKPU-PUN685421840/2022	EPI_ISL_15683556
2022-06-22	BA.2.2	hCoV-19/Hong Kong/HK-HKPU-PUN519023326/2022	EPI_ISL_15683845
2022-06-22	BA.2.2	hCoV-19/Hong Kong/HK-HKPU-PUN519024438/2022	EPI_ISL_15683844
2022-06-22	BA.2.2	hCoV-19/Hong Kong/HK-HKPU-PUN51706792A/2022	EPI_ISL_15683986
2022-06-22	BA.2.2	hCoV-19/Hong Kong/HK-HKPU-PUN517067512/2022	EPI_ISL_15683987
2022-06-22	BA.2.2	hCoV-19/Hong Kong/HK-HKPU-PUN517067377/2022	EPI_ISL_15683988
2022-06-22	BA.2.2	hCoV-19/Hong Kong/HK-HKPU-PUN517065331/2022	EPI_ISL_15683990
2022-06-22	BA.2.2	hCoV-19/Hong Kong/HK-HKPU-PUN51706520A/2022	EPI_ISL_15683991
2022-06-22	BA.2.2	hCoV-19/Hong Kong/HK-HKPU-PUN517067199/2022	EPI_ISL_15683989
2022-06-22	BA.2.2	hCoV-19/Hong Kong/HK-HKPU-PUN510359283/2022	EPI_ISL_15684203
2022-06-22	BA.2.2	hCoV-19/Hong Kong/HK-HKPU-PUN510358589/2022	EPI_ISL_15684204
2022-06-22	BA.2.2	hCoV-19/Hong Kong/HK-HKPU-PUN510353277/2022	EPI_ISL_15684206
2022-06-22	BA.2.2	hCoV-19/Hong Kong/HK-HKPU-PUN513732783/2022	EPI_ISL_15684093
2022-06-22	BA.2.2	hCoV-19/Hong Kong/HK-HKPU-PUN515331220/2022	EPI_ISL_15684051
2022-06-22	BA.2.2	hCoV-19/Hong Kong/HK-HKPU-PUN517639583/2022	EPI_ISL_15683956
2022-06-22	BA.2.2	hCoV-19/Hong Kong/HK-HKPU-PUN685436759/2022	EPI_ISL_15683550
2022-06-22	BA.2.2	hCoV-19/Hong Kong/HK-HKPU-PUN684589721/2022	EPI_ISL_15683598
2022-06-22	BA.2.2	hCoV-19/Hong Kong/HK-HKPU-PUN513313780/2022	EPI_ISL_15684113
2022-06-22	BA.2.2	hCoV-19/Hong Kong/HK-HKPU-PUN514281297/2022	EPI_ISL_15684080
2022-06-22	BA.2.2	hCoV-19/Hong Kong/HK-HKPU-PUN510357558/2022	EPI_ISL_15684205
2022-06-22	BA.2.2	hCoV-19/Hong Kong/HK-HKPU-PUN51371730A/2022	EPI_ISL_15684095
2022-06-22	BA.2.2	hCoV-19/Hong Kong/HK-HKPU-PUN384733053/2022	EPI_ISL_15684235
2022-06-22	BA.2.2	hCoV-19/Hong Kong/HK-HKPU-PUN383371891/2022	EPI_ISL_15684296
2022-06-22	BA.2.2	hCoV-19/Hong Kong/HK-HKPU-PUN383402169/2022	EPI_ISL_15684291
2022-06-22	BA.2.2	hCoV-19/Hong Kong/HK-HKPU-PUN384409779/2022	EPI_ISL_15684257
2022-06-22	BA.2.2	hCoV-19/Hong Kong/HK-HKPU-PUN383360660/2022	EPI_ISL_15684302
2022-06-22	BA.2.2	hCoV-19/Hong Kong/HK-HKPU-PUN383385027/2022	EPI_ISL_15684293
2022-06-22	BA.2.2	hCoV-19/Hong Kong/HK-HKPU-PUN685421166/2022	EPI_ISL_15683557
2022-06-22	BA.2.2	hCoV-19/Hong Kong/HK-HKPU-PUN517080411/2022	EPI_ISL_15683984
2022-06-22	BA.2.2	hCoV-19/Hong Kong/HK-HKPU-PUN517069183/2022	EPI_ISL_15683985
2022-06-22	BA.5.2.3	hCoV-19/Hong Kong/HK-HKPU-PU22MC728425/2022	EPI_ISL_15680184
2022-06-23	BA.2.2	hCoV-19/Hong Kong/HK-HKPU-PU22TM716175/2022	EPI_ISL_14226842
2022-06-23	BA.2.2	hCoV-19/Hong Kong/HK-HKPU-PU22TM716196/2022	EPI_ISL_14226843
2022-06-23	BA.2.2	hCoV-19/Hong Kong/HK-HKPU-PU22TM716200/2022	EPI_ISL_14226844
2022-06-23	BA.2.2	hCoV-19/Hong Kong/HK-HKPU-PU22TM716204/2022	EPI_ISL_14226845
2022-06-23	BA.2.2	hCoV-19/Hong Kong/HK-HKPU-PU22TM716205/2022	EPI_ISL_14226846
2022-06-23	BA.2.2	hCoV-19/Hong Kong/HK-HKPU-PU22TM332558/2022	EPI_ISL_14226847
2022-06-23	BA.2.2	hCoV-19/Hong Kong/HK-HKPU-PU22TM332601/2022	EPI_ISL_14226848
2022-06-23	BA.2.2	hCoV-19/Hong Kong/HK-HKPU-PU22TM332622/2022	EPI_ISL_14226849
2022-06-23	BA.2.2	hCoV-19/Hong Kong/HK-HKPU-PU22TM332641/2022	EPI_ISL_14226929
2022-06-23	BA.2.2	hCoV-19/Hong Kong/HK-HKPU-PU22TM332669/2022	EPI_ISL_14226930
2022-06-23	BA.2.2	hCoV-19/Hong Kong/HK-HKPU-PU22TM332748/2022	EPI_ISL_14226931
2022-06-23	BA.2.2	hCoV-19/Hong Kong/HK-HKPU-PU22TM716216/2022	EPI_ISL_14226932
2022-06-23	BA.2.2	hCoV-19/Hong Kong/HK-HKPU-PU22TM332813/2022	EPI_ISL_14226933
2022-06-23	BA.2.2	hCoV-19/Hong Kong/HK-HKPU-PU22TM332814/2022	EPI_ISL_14226934
2022-06-23	BA.2.2	hCoV-19/Hong Kong/HK-HKPU-PU22TM332823/2022	EPI_ISL_14226935
2022-06-23	BA.2.2	hCoV-19/Hong Kong/HK-HKPU-PU22TM332859/2022	EPI_ISL_14226936
2022-06-23	BA.2.2	hCoV-19/Hong Kong/HK-HKPU-PU22TM332900/2022	EPI_ISL_14226937
2022-06-23	BA.2.2	hCoV-19/Hong Kong/HK-HKPU-PU22TM332920/2022	EPI_ISL_14226938
2022-06-23	BA.2.2	hCoV-19/Hong Kong/HK-HKPU-PU22TM332931/2022	EPI_ISL_14226939
2022-06-23	BA.2.2	hCoV-19/Hong Kong/HK-HKPU-PU22TM332966/2022	EPI_ISL_14226940
2022-06-23	BA.2.2	hCoV-19/Hong Kong/HK-HKPU-PU22TM333021/2022	EPI_ISL_14226941
2022-06-23	BA.2.2	hCoV-19/Hong Kong/HK-HKPU-PU22TM333030/2022	EPI_ISL_14226942
2022-06-23	BA.2.2	hCoV-19/Hong Kong/HK-HKPU-PU22TM333059/2022	EPI_ISL_14226943
2022-06-23	BA.2.2	hCoV-19/Hong Kong/HK-HKPU-PU22MC728668/2022	EPI_ISL_14226949
2022-06-23	BA.2.2	hCoV-19/Hong Kong/HK-HKPU-PU22MC728681/2022	EPI_ISL_14226951
2022-06-23	BA.2.2	hCoV-19/Hong Kong/HK-HKPU-PU22MB342032/2022	EPI_ISL_14226952
2022-06-23	BA.2.2	hCoV-19/Hong Kong/HK-HKPU-PU22MB342062/2022	EPI_ISL_14226953
2022-06-23	BA.2.2	hCoV-19/Hong Kong/HK-HKPU-PU22MB342072/2022	EPI_ISL_14226954
2022-06-23	BA.2.2	hCoV-19/Hong Kong/HK-HKPU-PU22MB342110/2022	EPI_ISL_14226955
2022-06-23	BA.2.2	hCoV-19/Hong Kong/HK-HKPU-PU22MC728821/2022	EPI_ISL_14226956
2022-06-23	BA.2.2	hCoV-19/Hong Kong/HK-HKPU-PUN517081965/2022	EPI_ISL_15683982
2022-06-23	BA.2.2	hCoV-19/Hong Kong/HK-HKPU-PUN517082074/2022	EPI_ISL_15683981
2022-06-23	BA.2.2	hCoV-19/Hong Kong/HK-HKPU-PUN519012693/2022	EPI_ISL_15684529
2022-06-23	BA.2.2	hCoV-19/Hong Kong/HK-HKPU-PUN383523691/2022	EPI_ISL_15684288
2022-06-23	BA.2.2	hCoV-19/Hong Kong/HK-HKPU-PUN383361071/2022	EPI_ISL_15684300
2022-06-23	BA.2.2	hCoV-19/Hong Kong/HK-HKPU-PUN383368459/2022	EPI_ISL_15684298
2022-06-23	BA.2.2	hCoV-19/Hong Kong/HK-HKPU-PUN685434144/2022	EPI_ISL_15683551
2022-06-23	BA.2.2	hCoV-19/Hong Kong/HK-HKPU-PUN684813397/2022	EPI_ISL_15683584
2022-06-23	BA.2.2	hCoV-19/Hong Kong/HK-HKPU-PUN514831459/2022	EPI_ISL_15684068
2022-06-23	BA.2.2	hCoV-19/Hong Kong/HK-HKPU-PUN517841242/2022	EPI_ISL_15683944
2022-06-23	BA.2.2	hCoV-19/Hong Kong/HK-HKPU-PUN517080950/2022	EPI_ISL_15684484
2022-06-23	BA.2.2	hCoV-19/Hong Kong/HK-HKPU-PUN511641039/2022	EPI_ISL_15684156
2022-06-23	BA.2.2	hCoV-19/Hong Kong/HK-HKPU-PUN511462045/2022	EPI_ISL_15684188
2022-06-23	BA.2.2	hCoV-19/Hong Kong/HK-HKPU-PUN511462053/2022	EPI_ISL_15684187
2022-06-23	BA.2.2	hCoV-19/Hong Kong/HK-HKPU-PUN513717806/2022	EPI_ISL_15684094
2022-06-23	BA.2.2	hCoV-19/Hong Kong/HK-HKPU-PUN513325355/2022	EPI_ISL_15684108
2022-06-23	BA.2.2	hCoV-19/Hong Kong/HK-HKPU-PUN51268663A/2022	EPI_ISL_15684132
2022-06-23	BA.2.2	hCoV-19/Hong Kong/HK-HKPU-PUN38336822A/2022	EPI_ISL_15684299
2022-06-23	BA.2.2	hCoV-19/Hong Kong/HK-HKPU-PUN517080942/2022	EPI_ISL_15683983
2022-06-23	BA.2.2	hCoV-19/Hong Kong/HK-HKPU-PUN514286698/2022	EPI_ISL_15684077
2022-06-23	BA.2.2	hCoV-19/Hong Kong/HK-HKPU-PUN521241750/2022	EPI_ISL_15683789
2022-06-23	BA.2.2	hCoV-19/Hong Kong/HK-HKPU-PUN520358441/2022	EPI_ISL_15683821
2022-06-23	BA.2.2	hCoV-19/Hong Kong/HK-HKPU-PUN519011573/2022	EPI_ISL_15683849
2022-06-23	BA.2.2	hCoV-19/Hong Kong/HK-HKPU-PUN383379477/2022	EPI_ISL_15684295
2022-06-23	BA.2.2	hCoV-19/Hong Kong/HK-HKPU-PUN383523063/2022	EPI_ISL_15684289
2022-06-23	BA.2.2	hCoV-19/Hong Kong/HK-HKPU-PUN383360431/2022	EPI_ISL_15684303
2022-06-23	BA.2.2	hCoV-19/Hong Kong/HK-HKPU-PUN383371786/2022	EPI_ISL_15684297
2022-06-23	BA.2.74	hCoV-19/Hong Kong/HK-HKPU-PUN684708178/2022	EPI_ISL_15683595
2022-06-23	BA.2.74	hCoV-19/Hong Kong/HK-HKPU-PUN684815012/2022	EPI_ISL_15683525
2022-06-23	BA.2.74	hCoV-19/Hong Kong/HK-HKPU-PUN685442538/2022	EPI_ISL_15683547
2022-06-23	BA.2.2	hCoV-19/Hong Kong/HK-HKPU-PUN684700061/2022	EPI_ISL_15683596
2022-06-23	BA.2.2	hCoV-19/Hong Kong/HK-HKPU-PUN517085529/2022	EPI_ISL_15683980
2022-06-23	BA.2.2	hCoV-19/Hong Kong/HK-HKPU-PUN520845911/2022	EPI_ISL_15683799
2022-06-24	BA.2.2	hCoV-19/Hong Kong/HK-HKPU-PUN517647160/2022	EPI_ISL_15683954
2022-06-24	BA.2.2	hCoV-19/Hong Kong/HK-HKPU-PUN517645451/2022	EPI_ISL_15683955
2022-06-24	BA.2.2	hCoV-19/Hong Kong/HK-HKPU-PUN517645257/2022	EPI_ISL_15684413
2022-06-24	BA.2.12.1	hCoV-19/Hong Kong/HK-HKPU-PUN520358212/2022	EPI_ISL_15683822
2022-06-24	BA.2.2	hCoV-19/Hong Kong/HK-HKPU-PUN520088495/2022	EPI_ISL_15684557
2022-06-24	BA.2.2	hCoV-19/Hong Kong/HK-HKPU-PUN383607933/2022	EPI_ISL_15684531
2022-06-24	BA.2.2	hCoV-19/Hong Kong/HK-HKPU-PUN684580481/2022	EPI_ISL_15684409
2022-06-24	BA.2.2	hCoV-19/Hong Kong/HK-HKPU-PUN517116041/2022	EPI_ISL_15683979
2022-06-24	BA.2.2	hCoV-19/Hong Kong/HK-HKPU-PUN513744927/2022	EPI_ISL_15684092
2022-06-24	BA.2.2	hCoV-19/Hong Kong/HK-HKPU-PUN520845113/2022	EPI_ISL_15683800
2022-06-25	BA.2.2	hCoV-19/Hong Kong/HK-HKPU-PUN519343525/2022	EPI_ISL_15683841
2022-06-25	BA.2.2	hCoV-19/Hong Kong/HK-HKPU-PUN511463548/2022	EPI_ISL_15684186
2022-06-25	BA.2.2	hCoV-19/Hong Kong/HK-HKPU-PUN511460085/2022	EPI_ISL_15684191
2022-06-25	BA.2.2	hCoV-19/Hong Kong/HK-HKPU-PUN511460239/2022	EPI_ISL_15684189
2022-06-25	BA.2.2	hCoV-19/Hong Kong/HK-HKPU-PUN511460190/2022	EPI_ISL_15684190
2022-06-25	BA.2.2	hCoV-19/Hong Kong/HK-HKPU-PUN511463815/2022	EPI_ISL_15684185
2022-06-25	BA.2.2	hCoV-19/Hong Kong/HK-HKPU-PUN511470250/2022	EPI_ISL_15684521
2022-06-25	BA.2.2	hCoV-19/Hong Kong/HK-HKPU-PUN520369311/2022	EPI_ISL_15683819
2022-06-25	BA.2.2	hCoV-19/Hong Kong/HK-HKPU-PUN513764928/2022	EPI_ISL_15684090
2022-06-25	BA.2.12.1	hCoV-19/Hong Kong/HK-HKPU-PUN52047123A/2022	EPI_ISL_15683815
2022-06-25	BA.2.2	hCoV-19/Hong Kong/HK-HKPU-PUN68544865A/2022	EPI_ISL_15683546
2022-06-25	BA.2.2	hCoV-19/Hong Kong/HK-HKPU-PUN517889717/2022	EPI_ISL_15683941
2022-06-25	BA.2.2	hCoV-19/Hong Kong/HK-HKPU-PUN514283206/2022	EPI_ISL_15684078
2022-06-25	BA.2.2	hCoV-19/Hong Kong/HK-HKPU-PUN514281874/2022	EPI_ISL_15684079
2022-06-25	BA.2.2	hCoV-19/Hong Kong/HK-HKPU-PUN511467411/2022	EPI_ISL_15684184
2022-06-25	BA.2.2	hCoV-19/Hong Kong/HK-HKPU-PUN510543378/2022	EPI_ISL_15684197
2022-06-25	BA.2.2	hCoV-19/Hong Kong/HK-HKPU-PUN510758315/2022	EPI_ISL_15684192
2022-06-25	BA.2.2	hCoV-19/Hong Kong/HK-HKPU-PUN514030960/2022	EPI_ISL_15684084
2022-06-25	BA.2.2	hCoV-19/Hong Kong/HK-HKPU-PUN514952728/2022	EPI_ISL_15684066
2022-06-25	BA.2.2	hCoV-19/Hong Kong/HK-HKPU-PUN519128039/2022	EPI_ISL_15683843
2022-06-25	BA.2.2	hCoV-19/Hong Kong/HK-HKPU-PUN38338697A/2022	EPI_ISL_15684292
2022-06-25	BA.2.2	hCoV-19/Hong Kong/HK-HKPU-PUN383360776/2022	EPI_ISL_15684301
2022-06-25	BA.2.2	hCoV-19/Hong Kong/HK-HKPU-PUN383382575/2022	EPI_ISL_15684294
2022-06-25	BA.2.2	hCoV-19/Hong Kong/HK-HKPU-PUN685048619/2022	EPI_ISL_15683568
2022-06-25	BA.2.2	hCoV-19/Hong Kong/HK-HKPU-PUN685048082/2022	EPI_ISL_15683569
2022-06-25	BA.2.2	hCoV-19/Hong Kong/HK-HKPU-PUN685040154/2022	EPI_ISL_15683571
2022-06-25	BA.2.2	hCoV-19/Hong Kong/HK-HKPU-PUN68355696A/2022	EPI_ISL_15683636
2022-06-25	BA.2.2	hCoV-19/Hong Kong/HK-HKPU-PUN685047183/2022	EPI_ISL_15683570
2022-06-25	BA.2.12.1	hCoV-19/Hong Kong/HK-HKPU-PUN51765924A/2022	EPI_ISL_15683951
2022-06-25	BA.2.2	hCoV-19/Hong Kong/HK-HKPU-PUN509144163/2022	EPI_ISL_15684207
2022-06-26	BA.2.2	hCoV-19/Hong Kong/HK-HKPU-PUN517885967/2022	EPI_ISL_15683942
2022-06-26	BA.2.2	hCoV-19/Hong Kong/HK-HKPU-PUN514033897/2022	EPI_ISL_15684083
2022-06-26	BA.2.2	hCoV-19/Hong Kong/HK-HKPU-PUN519011964/2022	EPI_ISL_15683848
2022-06-26	BA.2.12.1	hCoV-19/Hong Kong/HK-HKPU-PUN384642988/2022	EPI_ISL_15684238
2022-06-26	BA.2.2	hCoV-19/Hong Kong/HK-HKPU-PUN684346918/2022	EPI_ISL_15683603
2022-06-26	BA.2.2	hCoV-19/Hong Kong/HK-HKPU-PUN522250095/2022	EPI_ISL_15683735
2022-06-26	BA.2.2	hCoV-19/Hong Kong/HK-HKPU-PUN522256913/2022	EPI_ISL_15683733
2022-06-26	BA.2.2	hCoV-19/Hong Kong/HK-HKPU-PUN522256697/2022	EPI_ISL_15683734
2022-06-26	BA.2.2	hCoV-19/Hong Kong/HK-HKPU-PUN515014756/2022	EPI_ISL_15684064
2022-06-26	BA.2.2	hCoV-19/Hong Kong/HK-HKPU-PUN51053607A/2022	EPI_ISL_15684198
2022-06-26	BA.2.2	hCoV-19/Hong Kong/HK-HKPU-PUN516186542/2022	EPI_ISL_15684009
2022-06-26	BA.2.2	hCoV-19/Hong Kong/HK-HKPU-PUN516187395/2022	EPI_ISL_15684008
2022-06-26	BA.2.2	hCoV-19/Hong Kong/HK-HKPU-PUN515960724/2022	EPI_ISL_15684015
2022-06-26	BA.2.2	hCoV-19/Hong Kong/HK-HKPU-PUN520472554/2022	EPI_ISL_15683814
2022-06-26	BA.2.2	hCoV-19/Hong Kong/HK-HKPU-PUN685438182/2022	EPI_ISL_15683548
2022-06-26	BA.2.2	hCoV-19/Hong Kong/HK-HKPU-PUN514920168/2022	EPI_ISL_15684067
2022-06-26	BA.2.2	hCoV-19/Hong Kong/HK-HKPU-PUN510546318/2022	EPI_ISL_15684196
2022-06-26	BA.2.2	hCoV-19/Hong Kong/HK-HKPU-PUN515056769/2022	EPI_ISL_15684058
2022-06-26	BA.5.2	hCoV-19/Hong Kong/HK-HKPU-PUN512689469/2022	EPI_ISL_15684459
2022-06-26	BA.2.2	hCoV-19/Hong Kong/HK-HKPU-PUN514824835/2022	EPI_ISL_15684070
2022-06-26	BA.2.2	hCoV-19/Hong Kong/HK-HKPU-PUN514826900/2022	EPI_ISL_15684069
2022-06-26	BA.2.2	hCoV-19/Hong Kong/HK-HKPU-PUN520477327/2022	EPI_ISL_15683813
2022-06-26	BA.2.2	hCoV-19/Hong Kong/HK-HKPU-PUN51276777A/2022	EPI_ISL_15684130
2022-06-26	BA.2.2	hCoV-19/Hong Kong/HK-HKPU-PUN684344397/2022	EPI_ISL_15683604
2022-06-26	BA.2.2	hCoV-19/Hong Kong/HK-HKPU-PUN68543800A/2022	EPI_ISL_15683549
2022-06-26	BA.2.2	hCoV-19/Hong Kong/HK-HKPU-PUN516882042/2022	EPI_ISL_15683992
2022-06-26	BA.2.2	hCoV-19/Hong Kong/HK-HKPU-PUN516881992/2022	EPI_ISL_15683993
2022-06-27	BA.2.2	hCoV-19/Hong Kong/HK-HKPU-PUN519015374/2022	EPI_ISL_14226975
2022-06-27	BA.2.2	hCoV-19/Hong Kong/HK-HKPU-PUN685428292/2022	EPI_ISL_14226976
2022-06-27	BA.2.2	hCoV-19/Hong Kong/HK-HKPU-PUN514827818/2022	EPI_ISL_14226977
2022-06-27	BA.2.2	hCoV-19/Hong Kong/HK-HKPU-PUN521712826/2022	EPI_ISL_14226978
2022-06-27	BA.2.2	hCoV-19/Hong Kong/HK-HKPU-PUN520909766/2022	EPI_ISL_14226979
2022-06-27	BA.2.2	hCoV-19/Hong Kong/HK-HKPU-PUN520909456/2022	EPI_ISL_14226980
2022-06-27	BA.2.2	hCoV-19/Hong Kong/HK-HKPU-PUN517448516/2022	EPI_ISL_14226981
2022-06-27	BA.2.2	hCoV-19/Hong Kong/HK-HKPU-PUN516907843/2022	EPI_ISL_14226982
2022-06-27	BA.2.2	hCoV-19/Hong Kong/HK-HKPU-PUN516908203/2022	EPI_ISL_14226983
2022-06-27	BA.2.2	hCoV-19/Hong Kong/HK-HKPU-PUN512766331/2022	EPI_ISL_14226984
2022-06-27	BA.2.2	hCoV-19/Hong Kong/HK-HKPU-PUN684332402/2022	EPI_ISL_14226985
2022-06-27	BA.2.2	hCoV-19/Hong Kong/HK-HKPU-PUN520908131/2022	EPI_ISL_14226986
2022-06-27	BA.2.2	hCoV-19/Hong Kong/HK-HKPU-PUN520900017/2022	EPI_ISL_14226987
2022-06-27	BA.2.2	hCoV-19/Hong Kong/HK-HKPU-PUN518893041/2022	EPI_ISL_14226988
2022-06-27	BA.2.2	hCoV-19/Hong Kong/HK-HKPU-PUN518893092/2022	EPI_ISL_14226989
2022-06-27	BA.2.2	hCoV-19/Hong Kong/HK-HKPU-PUN510538080/2022	EPI_ISL_14226990
2022-06-27	BA.2.2	hCoV-19/Hong Kong/HK-HKPU-PUN519124904/2022	EPI_ISL_14226991
2022-06-27	BA.2.2	hCoV-19/Hong Kong/HK-HKPU-PUN520846756/2022	EPI_ISL_14226992
2022-06-27	BA.2.2	hCoV-19/Hong Kong/HK-HKPU-PUN51428699A/2022	EPI_ISL_14226993
2022-06-27	BA.2.2	hCoV-19/Hong Kong/HK-HKPU-PUN516877448/2022	EPI_ISL_14226994
2022-06-27	BA.2.2	hCoV-19/Hong Kong/HK-HKPU-PUN514032645/2022	EPI_ISL_14226995
2022-06-27	BA.2.2	hCoV-19/Hong Kong/HK-HKPU-PUN383799131/2022	EPI_ISL_14226996
2022-06-27	BA.2.2	hCoV-19/Hong Kong/HK-HKPU-PUN684330450/2022	EPI_ISL_14226997
2022-06-27	BA.2.2	hCoV-19/Hong Kong/HK-HKPU-PUN684332739/2022	EPI_ISL_14226998
2022-06-27	BA.2.2	hCoV-19/Hong Kong/HK-HKPU-PUN522258134/2022	EPI_ISL_14226999
2022-06-27	BA.2.2	hCoV-19/Hong Kong/HK-HKPU-PUN480663478/2022	EPI_ISL_14227000
2022-06-27	BA.2.2	hCoV-19/Hong Kong/HK-HKPU-PUN511748879/2022	EPI_ISL_14227001
2022-06-27	BA.2.12.1	hCoV-19/Hong Kong/HK-HKPU-MC871027/2022	EPI_ISL_17581852
2022-06-29	BA.2.2	hCoV-19/Hong Kong/HK-HKPU-PUN522255321/2022	EPI_ISL_14227002
2022-06-29	BA.2.2	hCoV-19/Hong Kong/HK-HKPU-PUN516287454/2022	EPI_ISL_14227003
2022-06-29	BA.5.2.26	hCoV-19/Hong Kong/HK-HKPU-PUN520901706/2022	EPI_ISL_14227004
2022-06-29	BA.2.2	hCoV-19/Hong Kong/HK-HKPU-PUN520901870/2022	EPI_ISL_14227005
2022-06-29	BA.2.2	hCoV-19/Hong Kong/HK-HKPU-PUN384550390/2022	EPI_ISL_14227006
2022-06-29	BA.2.2	hCoV-19/Hong Kong/HK-HKPU-PUN384380185/2022	EPI_ISL_14227007
2022-06-29	BA.2.2	hCoV-19/Hong Kong/HK-HKPU-PUN384550102/2022	EPI_ISL_14227008
2022-06-29	BA.2.2	hCoV-19/Hong Kong/HK-HKPU-PUN383392317/2022	EPI_ISL_14227009
2022-06-29	BA.2.2	hCoV-19/Hong Kong/HK-HKPU-PUN683980362/2022	EPI_ISL_14227010
2022-06-29	BA.2.2	hCoV-19/Hong Kong/HK-HKPU-PUN683971630/2022	EPI_ISL_14227011
2022-06-29	BA.2.2	hCoV-19/Hong Kong/HK-HKPU-PUN683989971/2022	EPI_ISL_14227012
2022-06-29	BA.2.2	hCoV-19/Hong Kong/HK-HKPU-PUN519341522/2022	EPI_ISL_14227013
2022-06-29	BA.2.2	hCoV-19/Hong Kong/HK-HKPU-PUN519346397/2022	EPI_ISL_14227014
2022-06-29	BA.2.2	hCoV-19/Hong Kong/HK-HKPU-PUN520901528/2022	EPI_ISL_14227015
2022-06-29	BA.2.2	hCoV-19/Hong Kong/HK-HKPU-PUN516280395/2022	EPI_ISL_14227016
2022-06-29	BA.2.2	hCoV-19/Hong Kong/HK-HKPU-PUN510528549/2022	EPI_ISL_14227017
2022-06-29	BA.2.2	hCoV-19/Hong Kong/HK-HKPU-PUN510740785/2022	EPI_ISL_14227018
2022-06-29	BA.2.2	hCoV-19/Hong Kong/HK-HKPU-PUN510740955/2022	EPI_ISL_14227019
2022-06-29	BA.2.2	hCoV-19/Hong Kong/HK-HKPU-PUN520367297/2022	EPI_ISL_14227020
2022-06-29	BA.2.2	hCoV-19/Hong Kong/HK-HKPU-PUN522549058/2022	EPI_ISL_14227021
2022-06-29	BA.2.2	hCoV-19/Hong Kong/HK-HKPU-PUN384553640/2022	EPI_ISL_14227022
2022-06-29	BA.2.2	hCoV-19/Hong Kong/HK-HKPU-PUN384411978/2022	EPI_ISL_14227023
2022-06-29	BA.2.2	hCoV-19/Hong Kong/HK-HKPU-PUN683985127/2022	EPI_ISL_14227024
2022-06-29	BA.2.2	hCoV-19/Hong Kong/HK-HKPU-PUN516345799/2022	EPI_ISL_14227025
2022-06-29	BA.2.2	hCoV-19/Hong Kong/HK-HKPU-PUN521716163/2022	EPI_ISL_14227026
2022-06-29	BA.2.2	hCoV-19/Hong Kong/HK-HKPU-PUN51049962A/2022	EPI_ISL_14227027
2022-06-29	BA.2.2	hCoV-19/Hong Kong/HK-HKPU-PUN521717100/2022	EPI_ISL_14227028
2022-06-29	BA.2.2	hCoV-19/Hong Kong/HK-HKPU-PUN510491467/2022	EPI_ISL_14227029
2022-06-29	BA.2.2	hCoV-19/Hong Kong/HK-HKPU-PUN510525108/2022	EPI_ISL_14227030
2022-06-29	BA.2.2	hCoV-19/Hong Kong/HK-HKPU-PUN510525086/2022	EPI_ISL_14227031
2022-06-29	BA.2.2	hCoV-19/Hong Kong/HK-HKPU-PUN510522702/2022	EPI_ISL_14227032
2022-06-29	BA.2.2	hCoV-19/Hong Kong/HK-HKPU-PUN51052702A/2022	EPI_ISL_14227033
2022-06-29	BA.2.2	hCoV-19/Hong Kong/HK-HKPU-PUN510523830/2022	EPI_ISL_14227034
2022-06-29	BA.2.2	hCoV-19/Hong Kong/HK-HKPU-PUN515050361/2022	EPI_ISL_14227035
2022-06-29	BA.2.2	hCoV-19/Hong Kong/HK-HKPU-PUN51739078A/2022	EPI_ISL_14227036
2022-06-29	BA.2.2	hCoV-19/Hong Kong/HK-HKPU-PUN384553675/2022	EPI_ISL_14227037
2022-06-29	BA.2.2	hCoV-19/Hong Kong/HK-HKPU-PUN384550080/2022	EPI_ISL_14227038
2022-06-29	BA.2.2	hCoV-19/Hong Kong/HK-HKPU-PUN384914694/2022	EPI_ISL_14227039
2022-06-29	BA.2.2	hCoV-19/Hong Kong/HK-HKPU-PUN68398158A/2022	EPI_ISL_14227040
2022-06-29	BA.2.2	hCoV-19/Hong Kong/HK-HKPU-PUN683987375/2022	EPI_ISL_14227041
2022-06-29	BA.2.2	hCoV-19/Hong Kong/HK-HKPU-PUN683975164/2022	EPI_ISL_14227042
2022-06-29	BA.2.2	hCoV-19/Hong Kong/HK-HKPU-PUN516286407/2022	EPI_ISL_14227043
2022-06-29	BA.2.2	hCoV-19/Hong Kong/HK-HKPU-PUN516341718/2022	EPI_ISL_14227044
2022-06-29	BA.2.2	hCoV-19/Hong Kong/HK-HKPU-PUN520476010/2022	EPI_ISL_14227045
2022-06-29	BA.2.12.1	hCoV-19/Hong Kong/HK-HKPU-PUN504985534/2022	EPI_ISL_14227046
2022-06-30	BA.2.2	hCoV-19/Hong Kong/HK-HKPU-PUN516280026/2022	EPI_ISL_14227047
2022-06-30	BA.2.2	hCoV-19/Hong Kong/HK-HKPU-PUN516285222/2022	EPI_ISL_14227048
2022-06-30	BA.2.2	hCoV-19/Hong Kong/HK-HKPU-PUN516329378/2022	EPI_ISL_14227049
2022-06-30	BA.2.2	hCoV-19/Hong Kong/HK-HKPU-PUN384670833/2022	EPI_ISL_14227050
2022-06-30	BA.2.2	hCoV-19/Hong Kong/HK-HKPU-PUN384913523/2022	EPI_ISL_14227051
2022-06-30	BA.2.2	hCoV-19/Hong Kong/HK-HKPU-PUN384643402/2022	EPI_ISL_14227052
2022-06-30	BA.2.2	hCoV-19/Hong Kong/HK-HKPU-PUN384644328/2022	EPI_ISL_14227053
2022-06-30	BA.2.2	hCoV-19/Hong Kong/HK-HKPU-PUN684348864/2022	EPI_ISL_14227054
2022-06-30	BA.2.2	hCoV-19/Hong Kong/HK-HKPU-PUN684344648/2022	EPI_ISL_14227055
2022-06-30	BA.5.2.1	hCoV-19/Hong Kong/HK-HKPU-PUN684348414/2022	EPI_ISL_14227056
2022-06-30	BA.2.2	hCoV-19/Hong Kong/HK-HKPU-PUN684345466/2022	EPI_ISL_14227057
2022-06-30	BA.2.2	hCoV-19/Hong Kong/HK-HKPU-PUN522542258/2022	EPI_ISL_14227058
2022-06-30	BA.2.2	hCoV-19/Hong Kong/HK-HKPU-PUN522545400/2022	EPI_ISL_14227059
2022-06-30	BA.2.2	hCoV-19/Hong Kong/HK-HKPU-PUN522541898/2022	EPI_ISL_14227060
2022-06-30	BA.2.2	hCoV-19/Hong Kong/HK-HKPU-PUN516283777/2022	EPI_ISL_14227061
2022-06-30	BA.2.2	hCoV-19/Hong Kong/HK-HKPU-PUN516328681/2022	EPI_ISL_14227062
2022-06-30	BA.2.2	hCoV-19/Hong Kong/HK-HKPU-PUN516283874/2022	EPI_ISL_14227063
2022-06-30	BA.2.2	hCoV-19/Hong Kong/HK-HKPU-PUN510520734/2022	EPI_ISL_14227064
2022-06-30	BA.5.2	hCoV-19/Hong Kong/HK-HKPU-PUN515961364/2022	EPI_ISL_14227065
2022-06-30	BA.2.2	hCoV-19/Hong Kong/HK-HKPU-PUN515963057/2022	EPI_ISL_14227066
2022-06-30	BA.2.2	hCoV-19/Hong Kong/HK-HKPU-PUN510490800/2022	EPI_ISL_14227067
2022-06-30	BA.2.2	hCoV-19/Hong Kong/HK-HKPU-PUN384913213/2022	EPI_ISL_14227068
2022-06-30	BA.2.2	hCoV-19/Hong Kong/HK-HKPU-PUN384641477/2022	EPI_ISL_14227069
2022-06-30	BA.2.2	hCoV-19/Hong Kong/HK-HKPU-PUN684344745/2022	EPI_ISL_14227070
2022-06-30	BA.2.2	hCoV-19/Hong Kong/HK-HKPU-PUN509055527/2022	EPI_ISL_14227071
2022-06-30	BA.2.2	hCoV-19/Hong Kong/HK-HKPU-PUN507189461/2022	EPI_ISL_14227072
2022-06-30	BA.2.2	hCoV-19/Hong Kong/HK-HKPU-PUN511654157/2022	EPI_ISL_14227073
2022-06-30	BA.2.2	hCoV-19/Hong Kong/HK-HKPU-PUN511580218/2022	EPI_ISL_14227074
2022-06-30	BA.2.2	hCoV-19/Hong Kong/HK-HKPU-PUN511588936/2022	EPI_ISL_14227075
2022-06-30	BA.2.2	hCoV-19/Hong Kong/HK-HKPU-PUN512763731/2022	EPI_ISL_14227076
2022-06-30	BA.2.2	hCoV-19/Hong Kong/HK-HKPU-PUN512752713/2022	EPI_ISL_14227077
2022-06-30	BA.2.2	hCoV-19/Hong Kong/HK-HKPU-PUN684323330/2022	EPI_ISL_14227078
2022-06-30	BA.2.2	hCoV-19/Hong Kong/HK-HKPU-PUN503916865/2022	EPI_ISL_14227079
2022-06-30	BA.2.2	hCoV-19/Hong Kong/HK-HKPU-PUN503917470/2022	EPI_ISL_14227080
2022-06-30	BA.2.2	hCoV-19/Hong Kong/HK-HKPU-PUN516282045/2022	EPI_ISL_14227081
2022-06-30	BA.2.2	hCoV-19/Hong Kong/HK-HKPU-PUN516343990/2022	EPI_ISL_14227082
2022-06-30	BA.2.2	hCoV-19/Hong Kong/HK-HKPU-PUN516329238/2022	EPI_ISL_14227083
2022-06-30	BA.2.2	hCoV-19/Hong Kong/HK-HKPU-PUN516281987/2022	EPI_ISL_14227084
2022-06-30	BA.2.12.1	hCoV-19/Hong Kong/HK-HKPU-PUN516322101/2022	EPI_ISL_14227085
2022-06-30	BA.2.2	hCoV-19/Hong Kong/HK-HKPU-PUN522263154/2022	EPI_ISL_14227086
2022-07-01	BA.2.2	hCoV-19/Hong Kong/HK-HKPU-PUN383914739/2022	EPI_ISL_14227087
2022-07-01	BA.2.12.1	hCoV-19/Hong Kong/HK-HKPU-PUN383891712/2022	EPI_ISL_14227088
2022-07-01	BA.2.2	hCoV-19/Hong Kong/HK-HKPU-PUN684345997/2022	EPI_ISL_14227089
2022-07-01	BA.2.2	hCoV-19/Hong Kong/HK-HKPU-PUN68543487A/2022	EPI_ISL_14227090
2022-07-01	BA.2.2	hCoV-19/Hong Kong/HK-HKPU-PUN685422545/2022	EPI_ISL_14227091
2022-07-01	BA.2.2	hCoV-19/Hong Kong/HK-HKPU-PUN685433814/2022	EPI_ISL_14227092
2022-07-01	BA.2.2	hCoV-19/Hong Kong/HK-HKPU-PUN385052734/2022	EPI_ISL_14227093
2022-07-01	BA.2.2	hCoV-19/Hong Kong/HK-HKPU-PUN384384296/2022	EPI_ISL_14227094
2022-07-01	BA.2.2	hCoV-19/Hong Kong/HK-HKPU-PUN685434306/2022	EPI_ISL_14227095
2022-07-01	BA.2.2	hCoV-19/Hong Kong/HK-HKPU-PUN68504172A/2022	EPI_ISL_14227096
2022-07-01	BA.2.2	hCoV-19/Hong Kong/HK-HKPU-PUN513812027/2022	EPI_ISL_14227097
2022-07-01	BA.2.2	hCoV-19/Hong Kong/HK-HKPU-PUN513767250/2022	EPI_ISL_14227098
2022-07-01	BA.2.2	hCoV-19/Hong Kong/HK-HKPU-PUN503916938/2022	EPI_ISL_14227099
2022-07-01	BA.2.2	hCoV-19/Hong Kong/HK-HKPU-PUN384480201/2022	EPI_ISL_14227100
2022-07-01	BA.2.2	hCoV-19/Hong Kong/HK-HKPU-PUN38491631A/2022	EPI_ISL_14227101
2022-07-01	BA.2.2	hCoV-19/Hong Kong/HK-HKPU-PUN38491581A/2022	EPI_ISL_17581738
2022-07-01	BA.2.2	hCoV-19/Hong Kong/HK-HKPU-PUN28185267A/2022	EPI_ISL_17581163
2022-07-01	BA.2.2	hCoV-19/Hong Kong/HK-HKPU-PUN480824692/2022	EPI_ISL_17581826
2022-07-01	BA.5.6	hCoV-19/Hong Kong/HK-HKPU-MC871550/2022	EPI_ISL_17581293
2022-07-02	BA.2.2	hCoV-19/Hong Kong/HK-HKPU-PUN684326127/2022	EPI_ISL_17581827
2022-07-02	BA.2.2	hCoV-19/Hong Kong/HK-HKPU-PUN684326585/2022	EPI_ISL_17581828
2022-07-02	BA.4.1	hCoV-19/Hong Kong/HK-HKPU-MC871634/2022	EPI_ISL_17581233
2022-07-03	BA.2.2	hCoV-19/Hong Kong/HK-HKPU-PUN516023112/2022	EPI_ISL_17581829
2022-07-03	BA.2.2	hCoV-19/Hong Kong/HK-HKPU-PUN383919927/2022	EPI_ISL_17581830
2022-07-03	BA.2.2	hCoV-19/Hong Kong/HK-HKPU-PUN383901998/2022	EPI_ISL_17581831
2022-07-03	BA.2.2	hCoV-19/Hong Kong/HK-HKPU-PUN385045096/2022	EPI_ISL_17581832
2022-07-03	BA.2.2	hCoV-19/Hong Kong/HK-HKPU-PUN385056306/2022	EPI_ISL_17581833
2022-07-03	BF.1	hCoV-19/Hong Kong/HK-HKPU-PUN385055881/2022	EPI_ISL_17581292
2022-07-03	BA.2.2	hCoV-19/Hong Kong/HK-HKPU-PUN684325872/2022	EPI_ISL_17581834
2022-07-03	BA.2.2	hCoV-19/Hong Kong/HK-HKPU-PUN683593849/2022	EPI_ISL_17581835
2022-07-03	BA.2.2	hCoV-19/Hong Kong/HK-HKPU-PUN683593350/2022	EPI_ISL_17581836
2022-07-03	BA.2.2	hCoV-19/Hong Kong/HK-HKPU-PUN683599693/2022	EPI_ISL_17581837
2022-07-03	BA.2.2	hCoV-19/Hong Kong/HK-HKPU-PUN512088651/2022	EPI_ISL_17581838
2022-07-03	BA.2.2	hCoV-19/Hong Kong/HK-HKPU-PUN512756131/2022	EPI_ISL_17581839
2022-07-03	BA.2.2	hCoV-19/Hong Kong/HK-HKPU-PUN385055849/2022	EPI_ISL_17581840
2022-07-03	BA.2.2	hCoV-19/Hong Kong/HK-HKPU-PUN385096448/2022	EPI_ISL_17581841
2022-07-03	BA.2.2	hCoV-19/Hong Kong/HK-HKPU-PUN515613382/2022	EPI_ISL_17581842
2022-07-03	BA.2.2	hCoV-19/Hong Kong/HK-HKPU-PUN515612211/2022	EPI_ISL_17581843
2022-07-03	BA.2.2	hCoV-19/Hong Kong/HK-HKPU-PUN520474018/2022	EPI_ISL_17581844
2022-07-03	BA.2.2	hCoV-19/Hong Kong/HK-HKPU-PUN683598824/2022	EPI_ISL_17581845
2022-07-03	BA.2.2	hCoV-19/Hong Kong/HK-HKPU-PUN684604445/2022	EPI_ISL_17581846
2022-07-03	BA.2.2	hCoV-19/Hong Kong/HK-HKPU-PUN683599421/2022	EPI_ISL_17581847
2022-07-03	BA.2.2	hCoV-19/Hong Kong/HK-HKPU-PUN683598689/2022	EPI_ISL_17581848
2022-07-03	BA.2.2	hCoV-19/Hong Kong/HK-HKPU-PUN68460903A/2022	EPI_ISL_17581849
2022-07-03	BA.2.2	hCoV-19/Hong Kong/HK-HKPU-PUN684603929/2022	EPI_ISL_17581850
2022-07-03	BA.2.2	hCoV-19/Hong Kong/HK-HKPU-PUN684604488/2022	EPI_ISL_17581851
2022-07-03	BA.2.2	hCoV-19/Hong Kong/HK-HKPU-PUN683596392/2022	EPI_ISL_14261024
2022-07-03	BA.2.2	hCoV-19/Hong Kong/HK-HKPU-PUN683597569/2022	EPI_ISL_14261025
2022-07-03	BA.2.2	hCoV-19/Hong Kong/HK-HKPU-PUN684603341/2022	EPI_ISL_14261026
2022-07-03	BA.2.2	hCoV-19/Hong Kong/HK-HKPU-PUN684609609/2022	EPI_ISL_14261027
2022-07-03	BA.2.2	hCoV-19/Hong Kong/HK-HKPU-PUN513818793/2022	EPI_ISL_14261028
2022-07-03	BA.2.2	hCoV-19/Hong Kong/HK-HKPU-PUN520367181/2022	EPI_ISL_14261029
2022-07-03	BA.2.2	hCoV-19/Hong Kong/HK-HKPU-PUN513767544/2022	EPI_ISL_14261030
2022-07-03	BA.2.2	hCoV-19/Hong Kong/HK-HKPU-PUN683595221/2022	EPI_ISL_14261031
2022-07-03	BA.2.2	hCoV-19/Hong Kong/HK-HKPU-PUN68460075A/2022	EPI_ISL_14261032
2022-07-03	BA.2.2	hCoV-19/Hong Kong/HK-HKPU-PUN683969210/2022	EPI_ISL_14261033
2022-07-03	BA.2.2	hCoV-19/Hong Kong/HK-HKPU-PUN683988010/2022	EPI_ISL_14261034
2022-07-03	BA.2.2	hCoV-19/Hong Kong/HK-HKPU-PUN520377217/2022	EPI_ISL_14261035
2022-07-03	BA.2.2	hCoV-19/Hong Kong/HK-HKPU-PUN515612696/2022	EPI_ISL_14261036
2022-07-03	BA.5.1	hCoV-19/Hong Kong/HK-HKPU-MC871700/2022	EPI_ISL_17581294
2022-07-03	BF.1	hCoV-19/Hong Kong/HK-HKPU-MC871751/2022	EPI_ISL_17581150
2022-07-04	BA.2.2	hCoV-19/Hong Kong/HK-HKPU-PUN51634380A/2022	EPI_ISL_14261037
2022-07-04	BA.2.2	hCoV-19/Hong Kong/HK-HKPU-PUN516343486/2022	EPI_ISL_14261038
2022-07-04	BA.2.2	hCoV-19/Hong Kong/HK-HKPU-PUN516342013/2022	EPI_ISL_14261039
2022-07-04	BA.2.2	hCoV-19/Hong Kong/HK-HKPU-PUN521821528/2022	EPI_ISL_14261040
2022-07-04	BA.2.2	hCoV-19/Hong Kong/HK-HKPU-PUN51561253A/2022	EPI_ISL_14261041
2022-07-04	BA.2.2	hCoV-19/Hong Kong/HK-HKPU-PUN384855728/2022	EPI_ISL_14261042
2022-07-04	BA.2.2	hCoV-19/Hong Kong/HK-HKPU-PUN68358162A/2022	EPI_ISL_14261043
2022-07-04	BA.2.2	hCoV-19/Hong Kong/HK-HKPU-PUN684604143/2022	EPI_ISL_14261044
2022-07-04	BA.2.2	hCoV-19/Hong Kong/HK-HKPU-PUN521711552/2022	EPI_ISL_14261045
2022-07-04	BA.2.2	hCoV-19/Hong Kong/HK-HKPU-PUN513764235/2022	EPI_ISL_14261046
2022-07-04	BA.2.2	hCoV-19/Hong Kong/HK-HKPU-PUN520369397/2022	EPI_ISL_14261047
2022-07-04	BA.2.2	hCoV-19/Hong Kong/HK-HKPU-PUN521717216/2022	EPI_ISL_14261048
2022-07-04	BA.2.2	hCoV-19/Hong Kong/HK-HKPU-PUN513817347/2022	EPI_ISL_14261049
2022-07-04	BA.2.2	hCoV-19/Hong Kong/HK-HKPU-PUN510713087/2022	EPI_ISL_14261050
2022-07-04	BA.2.2	hCoV-19/Hong Kong/HK-HKPU-PUN516280069/2022	EPI_ISL_14261051
2022-07-04	BA.2.2	hCoV-19/Hong Kong/HK-HKPU-PUN520903717/2022	EPI_ISL_14261052
2022-07-04	BA.2.2	hCoV-19/Hong Kong/HK-HKPU-PUN516347252/2022	EPI_ISL_14261053
2022-07-04	BA.2.2	hCoV-19/Hong Kong/HK-HKPU-PUN511588707/2022	EPI_ISL_14261054
2022-07-04	BA.2.2	hCoV-19/Hong Kong/HK-HKPU-PUN51158261A/2022	EPI_ISL_14261055
2022-07-04	BA.2.2	hCoV-19/Hong Kong/HK-HKPU-PUN511585945/2022	EPI_ISL_14261056
2022-07-04	BA.2.2	hCoV-19/Hong Kong/HK-HKPU-PUN510523563/2022	EPI_ISL_14261057
2022-07-04	BA.2.2	hCoV-19/Hong Kong/HK-HKPU-PUN510526120/2022	EPI_ISL_14261058
2022-07-04	BA.2.2	hCoV-19/Hong Kong/HK-HKPU-PUN511589525/2022	EPI_ISL_14261059
2022-07-04	BA.2.2	hCoV-19/Hong Kong/HK-HKPU-PUN511658497/2022	EPI_ISL_14261060
2022-07-04	BA.2.2	hCoV-19/Hong Kong/HK-HKPU-PUN511658136/2022	EPI_ISL_14261061
2022-07-04	BA.2.2	hCoV-19/Hong Kong/HK-HKPU-PUN51889045A/2022	EPI_ISL_14261062
2022-07-04	BA.2.2	hCoV-19/Hong Kong/HK-HKPU-PUN515790268/2022	EPI_ISL_14261063
2022-07-04	BA.2.2	hCoV-19/Hong Kong/HK-HKPU-PUN504452080/2022	EPI_ISL_14261064
2022-07-04	BA.2.2	hCoV-19/Hong Kong/HK-HKPU-PUN507189763/2022	EPI_ISL_15684210
2022-07-04	BA.2.2	hCoV-19/Hong Kong/HK-HKPU-PUN509054660/2022	EPI_ISL_15684208
2022-07-04	BA.2.2	hCoV-19/Hong Kong/HK-HKPU-PUN521723984/2022	EPI_ISL_15683762
2022-07-04	BA.2.2	hCoV-19/Hong Kong/HK-HKPU-PUN521724263/2022	EPI_ISL_15683761
2022-07-04	BA.2.2	hCoV-19/Hong Kong/HK-HKPU-PUN510493273/2022	EPI_ISL_15684416
2022-07-04	BA.2.2	hCoV-19/Hong Kong/HK-HKPU-PUN520363615/2022	EPI_ISL_15683820
2022-07-04	BA.2.2	hCoV-19/Hong Kong/HK-HKPU-PUN38511098A/2022	EPI_ISL_15684417
2022-07-04	BA.2.2	hCoV-19/Hong Kong/HK-HKPU-PUN683982942/2022	EPI_ISL_15683612
2022-07-04	BA.2.2	hCoV-19/Hong Kong/HK-HKPU-PUN68359103A/2022	EPI_ISL_15684533
2022-07-04	BA.2.2	hCoV-19/Hong Kong/HK-HKPU-PUN516289708/2022	EPI_ISL_15684003
2022-07-04	BA.2.2	hCoV-19/Hong Kong/HK-HKPU-PUN516349190/2022	EPI_ISL_15683996
2022-07-04	BA.2.2	hCoV-19/Hong Kong/HK-HKPU-PUN522159624/2022	EPI_ISL_15683737
2022-07-04	BA.2.2	hCoV-19/Hong Kong/HK-HKPU-PUN522157087/2022	EPI_ISL_15683742
2022-07-04	BA.2.2	hCoV-19/Hong Kong/HK-HKPU-PUN522158040/2022	EPI_ISL_15683740
2022-07-04	BA.2.2	hCoV-19/Hong Kong/HK-HKPU-PUN511589541/2022	EPI_ISL_15684159
2022-07-04	BA.2.2	hCoV-19/Hong Kong/HK-HKPU-PUN511588383/2022	EPI_ISL_15684160
2022-07-04	BA.2.2	hCoV-19/Hong Kong/HK-HKPU-PUN51165503A/2022	EPI_ISL_15684154
2022-07-04	BA.2.2	hCoV-19/Hong Kong/HK-HKPU-PUN511587638/2022	EPI_ISL_15684161
2022-07-04	BA.2.2	hCoV-19/Hong Kong/HK-HKPU-PUN515047646/2022	EPI_ISL_15684060
2022-07-04	BA.2.2	hCoV-19/Hong Kong/HK-HKPU-PUN515051848/2022	EPI_ISL_15684059
2022-07-04	BA.2.2	hCoV-19/Hong Kong/HK-HKPU-PUN518918435/2022	EPI_ISL_15683855
2022-07-04	BA.2.2	hCoV-19/Hong Kong/HK-HKPU-PUN510492862/2022	EPI_ISL_15684202
2022-07-04	BA.2.2	hCoV-19/Hong Kong/HK-HKPU-PUN510493281/2022	EPI_ISL_15684201
2022-07-04	BA.2.2	hCoV-19/Hong Kong/HK-HKPU-PUN51049377A/2022	EPI_ISL_15684200
2022-07-04	BA.2.2	hCoV-19/Hong Kong/HK-HKPU-PUN510494784/2022	EPI_ISL_15684199
2022-07-04	BA.2.2	hCoV-19/Hong Kong/HK-HKPU-PUN384855248/2022	EPI_ISL_15684227
2022-07-04	BA.2.2	hCoV-19/Hong Kong/HK-HKPU-PUN384713257/2022	EPI_ISL_15684236
2022-07-04	BA.2.2	hCoV-19/Hong Kong/HK-HKPU-PUN384213122/2022	EPI_ISL_15684267
2022-07-04	BA.2.2	hCoV-19/Hong Kong/HK-HKPU-PUN384214498/2022	EPI_ISL_15684265
2022-07-04	BA.2.2	hCoV-19/Hong Kong/HK-HKPU-PUN683973552/2022	EPI_ISL_15683617
2022-07-04	BA.2.2	hCoV-19/Hong Kong/HK-HKPU-PUN683983787/2022	EPI_ISL_15683609
2022-07-04	BA.2.2	hCoV-19/Hong Kong/HK-HKPU-PUN516342684/2022	EPI_ISL_15683997
2022-07-04	BA.2.2	hCoV-19/Hong Kong/HK-HKPU-PUN517903485/2022	EPI_ISL_15683937
2022-07-04	BA.2.2	hCoV-19/Hong Kong/HK-HKPU-PUN281838049/2022	EPI_ISL_15684544
2022-07-04	BA.5.6	hCoV-19/Hong Kong/HK-HKPU-MC871820/2022	EPI_ISL_17581295
2022-07-05	BA.2.2	hCoV-19/Hong Kong/HK-HKPU-PUN383897192/2022	EPI_ISL_15684276
2022-07-05	BA.2.2	hCoV-19/Hong Kong/HK-HKPU-PUN384212967/2022	EPI_ISL_15684268
2022-07-05	BA.2.2	hCoV-19/Hong Kong/HK-HKPU-PUN384411463/2022	EPI_ISL_15684256
2022-07-05	BA.2.2	hCoV-19/Hong Kong/HK-HKPU-PUN384213599/2022	EPI_ISL_15684266
2022-07-05	BA.2.2	hCoV-19/Hong Kong/HK-HKPU-PUN683964030/2022	EPI_ISL_15683620
2022-07-05	BA.2.2	hCoV-19/Hong Kong/HK-HKPU-PUN683965525/2022	EPI_ISL_15683618
2022-07-05	BA.2.2	hCoV-19/Hong Kong/HK-HKPU-PUN683983140/2022	EPI_ISL_15683610
2022-07-05	BA.2.2	hCoV-19/Hong Kong/HK-HKPU-PUN683592907/2022	EPI_ISL_15683622
2022-07-05	BA.2.2	hCoV-19/Hong Kong/HK-HKPU-PUN683984651/2022	EPI_ISL_15683608
2022-07-05	BA.2.2	hCoV-19/Hong Kong/HK-HKPU-PUN519022400/2022	EPI_ISL_15683846
2022-07-05	BA.2.2	hCoV-19/Hong Kong/HK-HKPU-PUN519021935/2022	EPI_ISL_15683847
2022-07-05	BA.2.12.1	hCoV-19/Hong Kong/HK-HKPU-PUN519566877/2022	EPI_ISL_15683834
2022-07-05	BA.2.2	hCoV-19/Hong Kong/HK-HKPU-PUN517901911/2022	EPI_ISL_15683939
2022-07-05	BA.2.2	hCoV-19/Hong Kong/HK-HKPU-PUN515795049/2022	EPI_ISL_15684027
2022-07-05	BA.2.2	hCoV-19/Hong Kong/HK-HKPU-PUN518919792/2022	EPI_ISL_15683852
2022-07-05	BA.2.2	hCoV-19/Hong Kong/HK-HKPU-PUN521823288/2022	EPI_ISL_15683760
2022-07-05	BA.2.2	hCoV-19/Hong Kong/HK-HKPU-PUN518919474/2022	EPI_ISL_15683853
2022-07-05	BA.2.12.1	hCoV-19/Hong Kong/HK-HKPU-PUN521826112/2022	EPI_ISL_15683759
2022-07-05	BA.2.2	hCoV-19/Hong Kong/HK-HKPU-PUN520356813/2022	EPI_ISL_15683823
2022-07-05	BA.2.2	hCoV-19/Hong Kong/HK-HKPU-PUN510737954/2022	EPI_ISL_15684193
2022-07-05	BA.2.2	hCoV-19/Hong Kong/HK-HKPU-PUN383989593/2022	EPI_ISL_15684273
2022-07-05	BA.2.2	hCoV-19/Hong Kong/HK-HKPU-PUN385052793/2022	EPI_ISL_15684219
2022-07-05	BA.2.2	hCoV-19/Hong Kong/HK-HKPU-PUN384555341/2022	EPI_ISL_15684248
2022-07-05	BA.2.2	hCoV-19/Hong Kong/HK-HKPU-PUN683593024/2022	EPI_ISL_15684526
2022-07-05	BA.2.2	hCoV-19/Hong Kong/HK-HKPU-PUN52215360A/2022	EPI_ISL_15683744
2022-07-05	BA.2.2	hCoV-19/Hong Kong/HK-HKPU-PUN522151313/2022	EPI_ISL_15683747
2022-07-05	BA.2.2	hCoV-19/Hong Kong/HK-HKPU-PUN51329266A/2022	EPI_ISL_15684125
2022-07-05	BA.2.2	hCoV-19/Hong Kong/HK-HKPU-PUN521129616/2022	EPI_ISL_15683794
2022-07-05	BA.2.2	hCoV-19/Hong Kong/HK-HKPU-PUN52215214A/2022	EPI_ISL_15683746
2022-07-05	BA.2.2	hCoV-19/Hong Kong/HK-HKPU-PUN522152255/2022	EPI_ISL_15683745
2022-07-05	BA.2.2	hCoV-19/Hong Kong/HK-HKPU-PUN511583357/2022	EPI_ISL_15684163
2022-07-05	BA.2.2	hCoV-19/Hong Kong/HK-HKPU-PUN511580749/2022	EPI_ISL_15684164
2022-07-05	BA.2.2	hCoV-19/Hong Kong/HK-HKPU-PUN511586038/2022	EPI_ISL_15684162
2022-07-05	BA.2.2	hCoV-19/Hong Kong/HK-HKPU-PUN51158048A/2022	EPI_ISL_15684165
2022-07-05	BA.2.2	hCoV-19/Hong Kong/HK-HKPU-PUN515790993/2022	EPI_ISL_15684029
2022-07-05	BA.2.2	hCoV-19/Hong Kong/HK-HKPU-PUN515043136/2022	EPI_ISL_15684061
2022-07-05	BA.2.2	hCoV-19/Hong Kong/HK-HKPU-PUN515794808/2022	EPI_ISL_15684028
2022-07-05	BA.2.2	hCoV-19/Hong Kong/HK-HKPU-PUN510737903/2022	EPI_ISL_15684194
2022-07-05	BA.2.2	hCoV-19/Hong Kong/HK-HKPU-PUN520355795/2022	EPI_ISL_15683824
2022-07-05	BA.2.2	hCoV-19/Hong Kong/HK-HKPU-PUN383989879/2022	EPI_ISL_15684272
2022-07-05	BA.2.12.1	hCoV-19/Hong Kong/HK-HKPU-PUN383989259/2022	EPI_ISL_15684275
2022-07-05	BA.2.2	hCoV-19/Hong Kong/HK-HKPU-PUN384216946/2022	EPI_ISL_15684264
2022-07-05	BA.2.2	hCoV-19/Hong Kong/HK-HKPU-PUN683983086/2022	EPI_ISL_15683611
2022-07-05	BA.2.2	hCoV-19/Hong Kong/HK-HKPU-PUN683580496/2022	EPI_ISL_15683630
2022-07-05	BA.2.2	hCoV-19/Hong Kong/HK-HKPU-PUN683591900/2022	EPI_ISL_15683623
2022-07-05	BA.2.2	hCoV-19/Hong Kong/HK-HKPU-PUN683585609/2022	EPI_ISL_15683628
2022-07-05	BA.2.2	hCoV-19/Hong Kong/HK-HKPU-PUN513295235/2022	EPI_ISL_15684121
2022-07-05	BA.2.2	hCoV-19/Hong Kong/HK-HKPU-PUN513291450/2022	EPI_ISL_15684126
2022-07-05	BA.2.2	hCoV-19/Hong Kong/HK-HKPU-PUN513292678/2022	EPI_ISL_15684124
2022-07-05	BA.2.2	hCoV-19/Hong Kong/HK-HKPU-PUN281838162/2022	EPI_ISL_15684306
2022-07-05	BA.2.2	hCoV-19/Hong Kong/HK-HKPU-PUN281328784/2022	EPI_ISL_15684307
2022-07-06	BA.2.2	hCoV-19/Hong Kong/HK-HKPU-PUN513298048/2022	EPI_ISL_15684117
2022-07-06	BA.2.2	hCoV-19/Hong Kong/HK-HKPU-PUN513296258/2022	EPI_ISL_15684120
2022-07-06	BA.2.2	hCoV-19/Hong Kong/HK-HKPU-PUN520609916/2022	EPI_ISL_15683810
2022-07-06	BA.2.2	hCoV-19/Hong Kong/HK-HKPU-PUN521438562/2022	EPI_ISL_15683766
2022-07-06	BA.2.2	hCoV-19/Hong Kong/HK-HKPU-PUN383989577/2022	EPI_ISL_15684274
2022-07-06	BA.2.2	hCoV-19/Hong Kong/HK-HKPU-PUN384657764/2022	EPI_ISL_15684237
2022-07-06	BA.2.12.1	hCoV-19/Hong Kong/HK-HKPU-PUN683977523/2022	EPI_ISL_15683614
2022-07-06	BA.2.12.1	hCoV-19/Hong Kong/HK-HKPU-PUN683580046/2022	EPI_ISL_15683631
2022-07-06	BA.2.2	hCoV-19/Hong Kong/HK-HKPU-PUN683455047/2022	EPI_ISL_15683644
2022-07-06	BA.2.2	hCoV-19/Hong Kong/HK-HKPU-PUN522604059/2022	EPI_ISL_15683718
2022-07-06	BA.2.12.1	hCoV-19/Hong Kong/HK-HKPU-PUN522607988/2022	EPI_ISL_15683715
2022-07-06	BA.2.2	hCoV-19/Hong Kong/HK-HKPU-PUN513294972/2022	EPI_ISL_15684122
2022-07-06	BA.2.2	hCoV-19/Hong Kong/HK-HKPU-PUN513297378/2022	EPI_ISL_15684118
2022-07-06	BA.2.2	hCoV-19/Hong Kong/HK-HKPU-PUN518887262/2022	EPI_ISL_15683866
2022-07-06	BA.2.2	hCoV-19/Hong Kong/HK-HKPU-PUN518888684/2022	EPI_ISL_15683865
2022-07-06	BA.2.2	hCoV-19/Hong Kong/HK-HKPU-PUN518883321/2022	EPI_ISL_15683868
2022-07-06	BA.2.2	hCoV-19/Hong Kong/HK-HKPU-PUN512554660/2022	EPI_ISL_15684145
2022-07-06	BA.2.2	hCoV-19/Hong Kong/HK-HKPU-PUN512554334/2022	EPI_ISL_15684146
2022-07-06	BA.2.2	hCoV-19/Hong Kong/HK-HKPU-PUN520457121/2022	EPI_ISL_15683817
2022-07-06	BA.2.2	hCoV-19/Hong Kong/HK-HKPU-PUN520459280/2022	EPI_ISL_15683816
2022-07-06	BA.2.2	hCoV-19/Hong Kong/HK-HKPU-PUN51377771A/2022	EPI_ISL_15684086
2022-07-06	BA.2.2	hCoV-19/Hong Kong/HK-HKPU-PUN506405349/2022	EPI_ISL_15684212
2022-07-06	BA.2.2	hCoV-19/Hong Kong/HK-HKPU-PUN507208326/2022	EPI_ISL_15684209
2022-07-06	BA.2.2	hCoV-19/Hong Kong/HK-HKPU-PUN522155777/2022	EPI_ISL_15683743
2022-07-06	BA.2.2	hCoV-19/Hong Kong/HK-HKPU-PUN506408240/2022	EPI_ISL_15684211
2022-07-06	BA.2.2	hCoV-19/Hong Kong/HK-HKPU-PUN519346990/2022	EPI_ISL_15683840
2022-07-06	BA.2.2	hCoV-19/Hong Kong/HK-HKPU-PUN522608720/2022	EPI_ISL_15683714
2022-07-06	BA.2.12.1	hCoV-19/Hong Kong/HK-HKPU-PUN522605543/2022	EPI_ISL_15683717
2022-07-06	BA.2.2	hCoV-19/Hong Kong/HK-HKPU-PUN521169960/2022	EPI_ISL_15683793
2022-07-06	BA.2.2	hCoV-19/Hong Kong/HK-HKPU-PUN685377302/2022	EPI_ISL_15683561
2022-07-06	BA.2.2	hCoV-19/Hong Kong/HK-HKPU-PUN685376063/2022	EPI_ISL_15683562
2022-07-06	BA.2.2	hCoV-19/Hong Kong/HK-HKPU-PUN68347579A/2022	EPI_ISL_15683638
2022-07-06	BA.2.2	hCoV-19/Hong Kong/HK-HKPU-PUN683587741/2022	EPI_ISL_15683625
2022-07-06	BA.2.2	hCoV-19/Hong Kong/HK-HKPU-PUN521391280/2022	EPI_ISL_15683774
2022-07-06	BA.2.2	hCoV-19/Hong Kong/HK-HKPU-PUN521127508/2022	EPI_ISL_15683796
2022-07-06	BA.2.2	hCoV-19/Hong Kong/HK-HKPU-PUN521393941/2022	EPI_ISL_15683771
2022-07-06	BA.2.2	hCoV-19/Hong Kong/HK-HKPU-PUN518898485/2022	EPI_ISL_15683863
2022-07-06	BA.2.2	hCoV-19/Hong Kong/HK-HKPU-PUN51888378A/2022	EPI_ISL_15683867
2022-07-06	BA.2.2	hCoV-19/Hong Kong/HK-HKPU-PUN518882449/2022	EPI_ISL_15683869
2022-07-06	BA.2.2	hCoV-19/Hong Kong/HK-HKPU-PUN512555462/2022	EPI_ISL_15684144
2022-07-06	BA.2.2	hCoV-19/Hong Kong/HK-HKPU-PUN520610116/2022	EPI_ISL_15683809
2022-07-06	BA.2.2	hCoV-19/Hong Kong/HK-HKPU-PUN513621752/2022	EPI_ISL_15684414
2022-07-06	BA.2.2	hCoV-19/Hong Kong/HK-HKPU-PUN521965406/2022	EPI_ISL_15683753
2022-07-06	BA.2.2	hCoV-19/Hong Kong/HK-HKPU-PUN519827107/2022	EPI_ISL_15683832
2022-07-06	BA.2.2	hCoV-19/Hong Kong/HK-HKPU-PUN519822075/2022	EPI_ISL_15683833
2022-07-06	BA.2.2	hCoV-19/Hong Kong/HK-HKPU-PUN684478989/2022	EPI_ISL_15683601
2022-07-06	BA.2.2	hCoV-19/Hong Kong/HK-HKPU-PUN684477397/2022	EPI_ISL_15683602
2022-07-06	BA.2.2	hCoV-19/Hong Kong/HK-HKPU-PUN683965509/2022	EPI_ISL_15683619
2022-07-06	BA.2.2	hCoV-19/Hong Kong/HK-HKPU-PUN683575255/2022	EPI_ISL_15684411
2022-07-06	BA.2.12.1	hCoV-19/Hong Kong/HK-HKPU-PUN521122565/2022	EPI_ISL_15683798
2022-07-06	BA.2.2	hCoV-19/Hong Kong/HK-HKPU-PUN513297009/2022	EPI_ISL_15684119
2022-07-06	BA.2.2	hCoV-19/Hong Kong/HK-HKPU-PUN513775210/2022	EPI_ISL_15684088
2022-07-06	BA.2.2	hCoV-19/Hong Kong/HK-HKPU-PUN281603254/2022	EPI_ISL_15684519
2022-07-07	BA.2.2	hCoV-19/Hong Kong/HK-HKPU-PUN513294182/2022	EPI_ISL_15684415
2022-07-07	BA.2.2	hCoV-19/Hong Kong/HK-HKPU-PUN521125432/2022	EPI_ISL_15683797
2022-07-07	BA.2.2	hCoV-19/Hong Kong/HK-HKPU-PUN513293089/2022	EPI_ISL_15684123
2022-07-07	BA.2.2	hCoV-19/Hong Kong/HK-HKPU-PUN521128520/2022	EPI_ISL_15683795
2022-07-07	BA.2.2	hCoV-19/Hong Kong/HK-HKPU-PUN521964205/2022	EPI_ISL_15683754
2022-07-07	BA.2.2	hCoV-19/Hong Kong/HK-HKPU-PUN383451712/2022	EPI_ISL_15684290
2022-07-07	BA.2.2	hCoV-19/Hong Kong/HK-HKPU-PUN683570814/2022	EPI_ISL_15683634
2022-07-07	BA.2.2	hCoV-19/Hong Kong/HK-HKPU-PUN685379003/2022	EPI_ISL_15683560
2022-07-07	BA.2.2	hCoV-19/Hong Kong/HK-HKPU-PUN521392716/2022	EPI_ISL_15683773
2022-07-07	BA.2.2	hCoV-19/Hong Kong/HK-HKPU-PUN521392910/2022	EPI_ISL_15683772
2022-07-07	BA.2.2	hCoV-19/Hong Kong/HK-HKPU-PUN512558143/2022	EPI_ISL_15684143
2022-07-07	BA.2.2	hCoV-19/Hong Kong/HK-HKPU-PUN512552323/2022	EPI_ISL_15684150
2022-07-07	BA.2.2	hCoV-19/Hong Kong/HK-HKPU-PUN512552358/2022	EPI_ISL_15684149
2022-07-07	BA.2.2	hCoV-19/Hong Kong/HK-HKPU-PUN515759166/2022	EPI_ISL_15684030
2022-07-07	BA.2.2	hCoV-19/Hong Kong/HK-HKPU-PUN515758550/2022	EPI_ISL_15684031
2022-07-07	BA.2.2	hCoV-19/Hong Kong/HK-HKPU-PUN515757961/2022	EPI_ISL_15684032
2022-07-07	BA.2.2	hCoV-19/Hong Kong/HK-HKPU-PUN515742085/2022	EPI_ISL_15684033
2022-07-07	BA.2.2	hCoV-19/Hong Kong/HK-HKPU-PUN515412972/2022	EPI_ISL_15684047
2022-07-07	BA.2.2	hCoV-19/Hong Kong/HK-HKPU-PUN517435503/2022	EPI_ISL_15683969
2022-07-07	BA.2.2	hCoV-19/Hong Kong/HK-HKPU-PUN517435538/2022	EPI_ISL_15683968
2022-07-07	BA.2.2	hCoV-19/Hong Kong/HK-HKPU-PUN519893371/2022	EPI_ISL_15683830
2022-07-07	BA.2.2	hCoV-19/Hong Kong/HK-HKPU-PUN52260623A/2022	EPI_ISL_15683716
2022-07-07	BA.2.2	hCoV-19/Hong Kong/HK-HKPU-PUN384509684/2022	EPI_ISL_15684253
2022-07-07	BA.5.2	hCoV-19/Hong Kong/HK-HKPU-PUN384319214/2022	EPI_ISL_15684461
2022-07-07	BA.2.2	hCoV-19/Hong Kong/HK-HKPU-PUN683570342/2022	EPI_ISL_15684556
2022-07-07	BA.2.2	hCoV-19/Hong Kong/HK-HKPU-PUN683573937/2022	EPI_ISL_15683632
2022-07-07	BA.2.2	hCoV-19/Hong Kong/HK-HKPU-PUN683572116/2022	EPI_ISL_15683633
2022-07-07	BA.2.2	hCoV-19/Hong Kong/HK-HKPU-PUN683570423/2022	EPI_ISL_15683635
2022-07-07	BA.2.2	hCoV-19/Hong Kong/HK-HKPU-PUN516320265/2022	EPI_ISL_15684001
[truncated: 2,686 more rows]
